# Supplementary material for: Improving protein complex prediction by reconstructing a high-confidence protein-protein interaction network of Escherichia coli from different physical interaction data sources
Source: PubMed Central journal article supplement (PMC5209909; doi:10.1186/s12859-016-1422-x), 2017-01-03
Supplement: 12859_2016_1422_MOESM1_ESM.pdf [file 12859_2016_1422_MOESM1_ESM.pdf]

## SUPPLEMENTARY MATERIALS

# Reconstructing a high-confidence protein-protein interaction network of *Escherichia coli* from different physical interaction data sources improves protein complex predictions

Shirin Taghipour, Peyman Zarrineh, Mohammad Ganjtabesh\* and Abbas Nowzari-Dalini

## Module detection

### 1 Detecting co-expression modules

Expression data was obtained from the microarray compendium of *E. coli* by Lemmens et al. [1]. For this aim, a weighted co-expression network was constructed. Then, Pearson correlations measured in the expression patterns of microarray experiments are taken as the weights of undirected connections between every pair of genes. By using 0.6 as a cut-off, an unweighted co-expression network was derived. OSLOM clustering method [2] was used to detect co-expression modules from this network.

### 2 Detecting co-functionality modules

Functional information as Gene Ontology (GO) terms for *E. coli* was downloaded from the AmiGO database [3]. Only biological process domain was used to define gene pairs similarity and built co-functionality network. To extract a functional similarity network, the GO terms associated to each gene are treated as binary variables: 1 if the gene participates in a given function and 0 otherwise. By considering all the functional terms and keeping an established order, a vector  $v_i$  per gene can be constructed detailing the functional information of gene  $i$ . The cosine similarity of two of these vectors  $v_i$  and  $v_j$  is used as a metric, accounting for genes  $i$  and  $j$  overlap in functionality:

$$Sim(g_i, g_j) = \frac{v_i \cdot v_j}{\|v_i\| \cdot \|v_j\|}$$

Here the size of vectors is equal to nonempty GO terms in *E. coli* (GO terms that at least one gene has assigned to it). Many genes are not well annotated or just annotated for very general function (GO term at top of the GO hierarchy), and their corresponding vectors contain many zeros. In this case, their similarity becomes 1 if another gene is also annotated for such

general function, while the general functional classes are not very informative. For this reason, we used the dot product over the vectors without any normalization. In this way, those genes that are annotated for GO terms at lower GO hierarchy (more informative functional classes) are more likely to have higher similarity in co-functionality network.

A weighted co-functionality network was then built by assembling all the gene-gene dyadic similarities. OSLOM clustering method [2] was used to detect co-functionality modules from this network.

### 3 Detecting co-regulation modules

The *E. coli* regulatory network was downloaded from RegulonDB database [4]. First the PageRank value [5] of each regulator in the regulatory network was calculated as a measure to assess the importance of the regulator. Then, the co-regulation of all gene pairs were calculated by using the PageRank values of their common regulators. This co-regulation similarity for genes  $i$  and  $j$  is defined as follows:

$$Sim(g_i, g_j) = \sum_{t=1}^n \frac{regulation\_type(R_t)}{PageRank(R_t)},$$

where  $n$  is the number of common regulators between genes and *regulation\_type* is equal to 1 if the common regulator  $R_t$  of genes  $g_i$  and  $g_j$  activates or suppresses both genes, and  $-1$  otherwise. After constructing weighted co-regulation network, OSLOM clustering method [2] was used to detect co-regulation modules from this network. The full description of these networks construction can be found in: <https://sites.google.com/site/peymanzarrinehresearch/cross-net>.

#### References

1. Lemmens K, De Bie T, Dhollander T, De Keersmaecker SC, Thijs IM, Schoofs G and Marchal K. (2009). DISTILLER: a data integration framework to reveal condition dependency of complex regulons in *Escherichia coli*. *Genome Biol*, **10**, R27.

\*Correspondence: mgtabesh@ut.ac.ir

Full list of author information is available at the end of the article

2. Lancichinetti A, Fortunato S and Kertész J. (2009). Detecting the overlapping and hierarchical community structure in complex networks. *New Journal of Physics*, **11**, 033015.
3. Carbon S, Ireland A, Mungall CJ, Shu S, Marshall B, Lewis S and *et al.* (2009) AmiGO: online access to ontology and annotation data, *Bioinformatics*, **25**,288-289.
4. Gama-Castro S, Salgado H, Santos-Zavaleta A, Ledezma-Tejeda D, Muñoz-Rascado L, García-Sotelo JS, Alquicira-Hernández K, Martínez-Flores I, Pannier L, Castro-Mondragón JA, Medina-Rivera A, Solano-Lira H, Bonavides-Martínez C, Pérez-Rueda E, Alquicira-Hernández S, Porrón-Sotelo L, López-Fuentes A, Hernández-Koutoucheva A, Moral-Chávez VD, Rinaldi F and Collado-Vides J. (2016). RegulonDB version 9.0: high-level integration of gene regulation, coexpression, motif clustering and beyond. *Nucleic Acids Res*, **44**, (D1): D133-43, doi: 10.1093/nar/gkv1156.
5. Brin S and Page L. (1998). The Anatomy of a Large-Scale Hypertextual Web Search Engine. *Seventh International World-Wide Web Conference (WWW 1998)*, April 14-18, Brisbane, Australia.

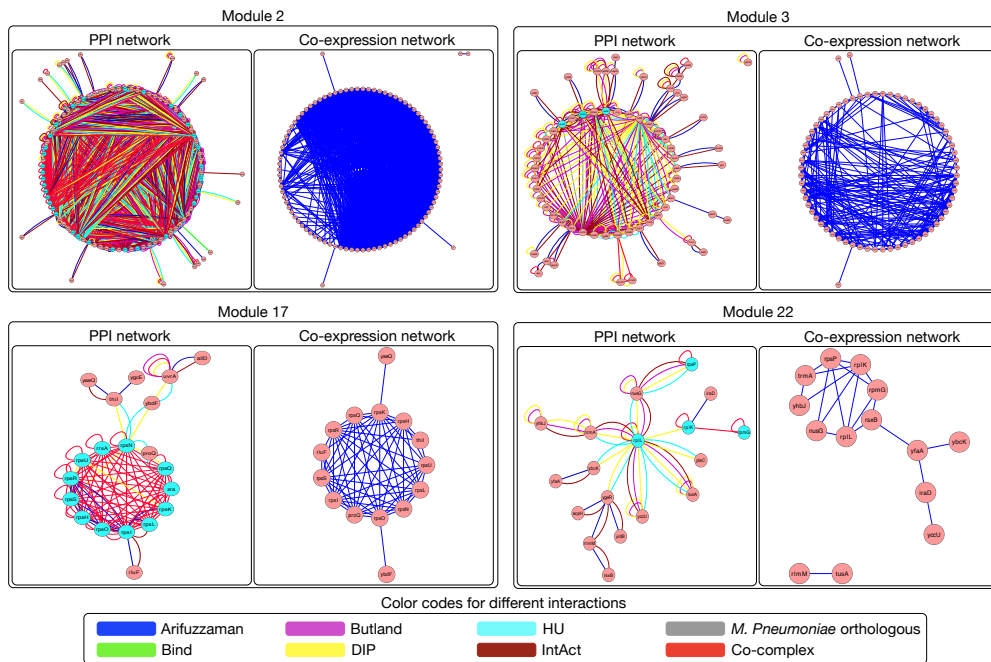

**Figure S1 Ribosomal modules.** Ribosomal complex is essential for RNA translation. Ribosomal proteins has been detected in four large PPI modules 2, 3, 17, and 22. Module 2 also include RNase P complex and Degradosome complex. Module 3 contains TU complex elongation facton. As it can be seen in this figure, many of the proteins and protein complexes which have found in these four modules are co-expressed with ribosomal proteins and our literature mining through EcoCyc database reveals that many of these proteins interacts with ribosome. Ribosomal proteins are marked with different color.

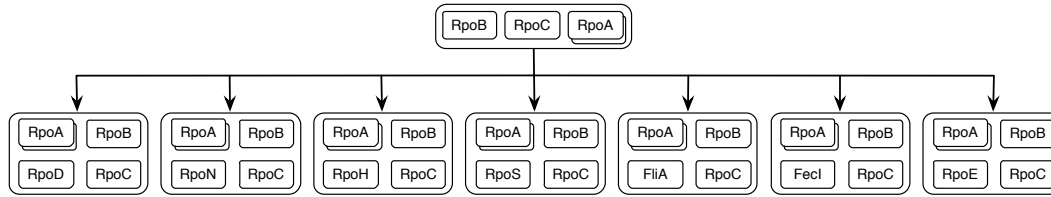

(a) RNA polymerase complexes derived from EcoCyc

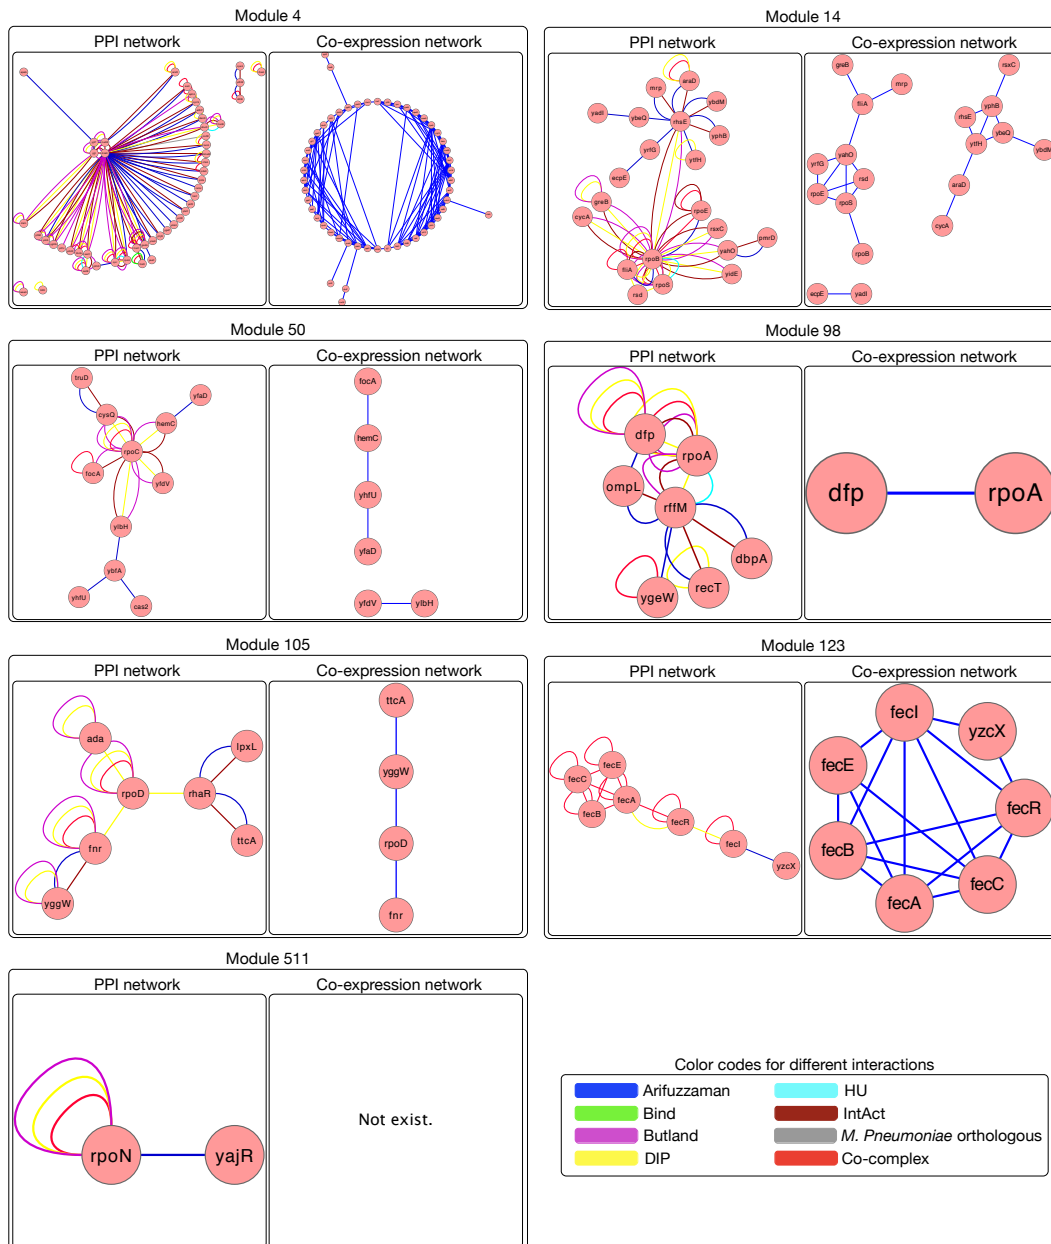

(b) Detected PPI modules containing RNA polymerase proteins

**Figure S2 RNA polymerase.** RNA polymerase is essential for initiation of gene transcription in Bacteria. (a) Seven different kinds of RNA polymerase complexes exist in *E. coli*. For the constitution all these seven complexes first [(RpoB)(RpoC)(RpoA)<sub>2</sub>] complex must be built. Each one of the seven RNA polymerase complexes contain a specific protein which interact with [(RpoB)(RpoC)(RpoA)<sub>2</sub>] complex. (b) RNA polymerase related proteins have been scattered in seven different modules (module 4, 14, 50, 98, 105, 123, 511).

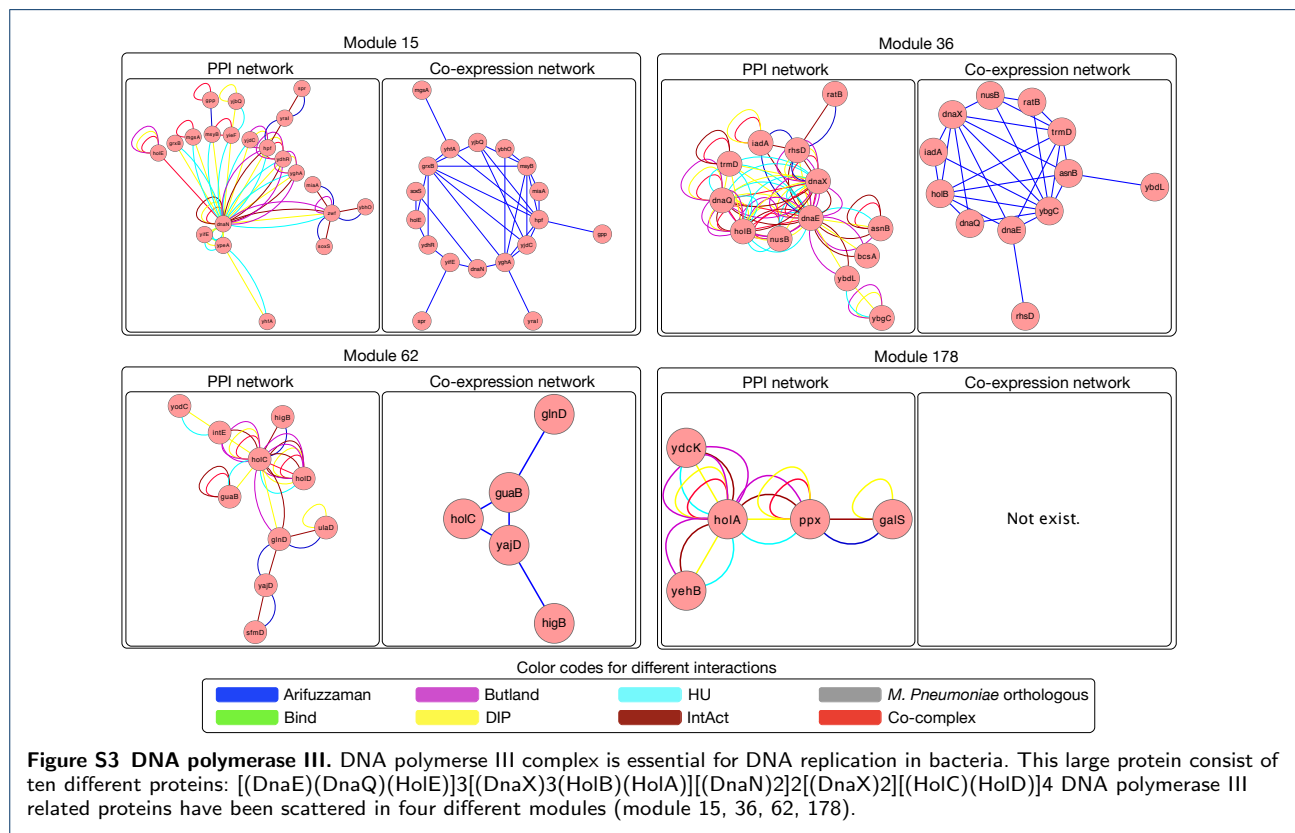

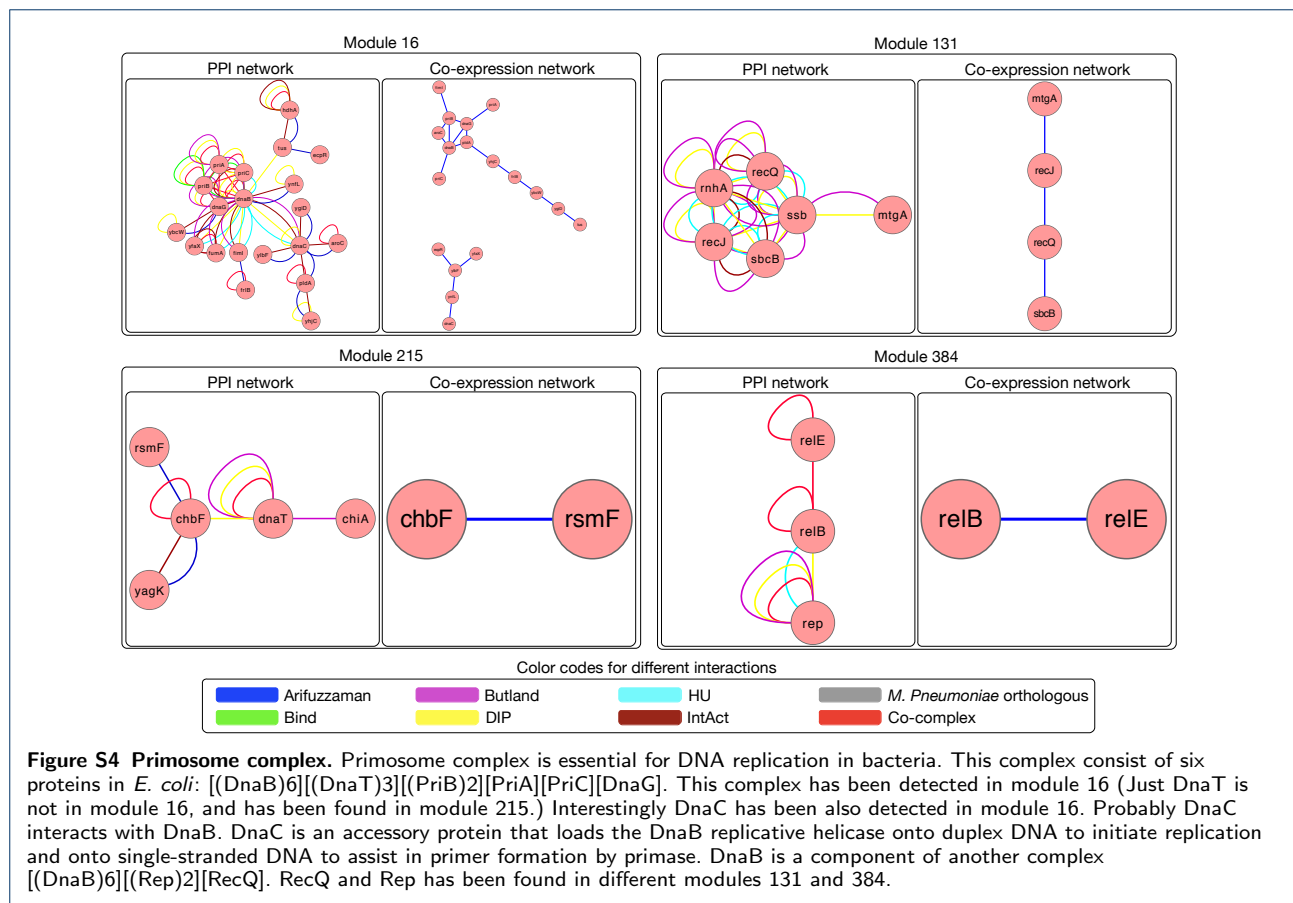

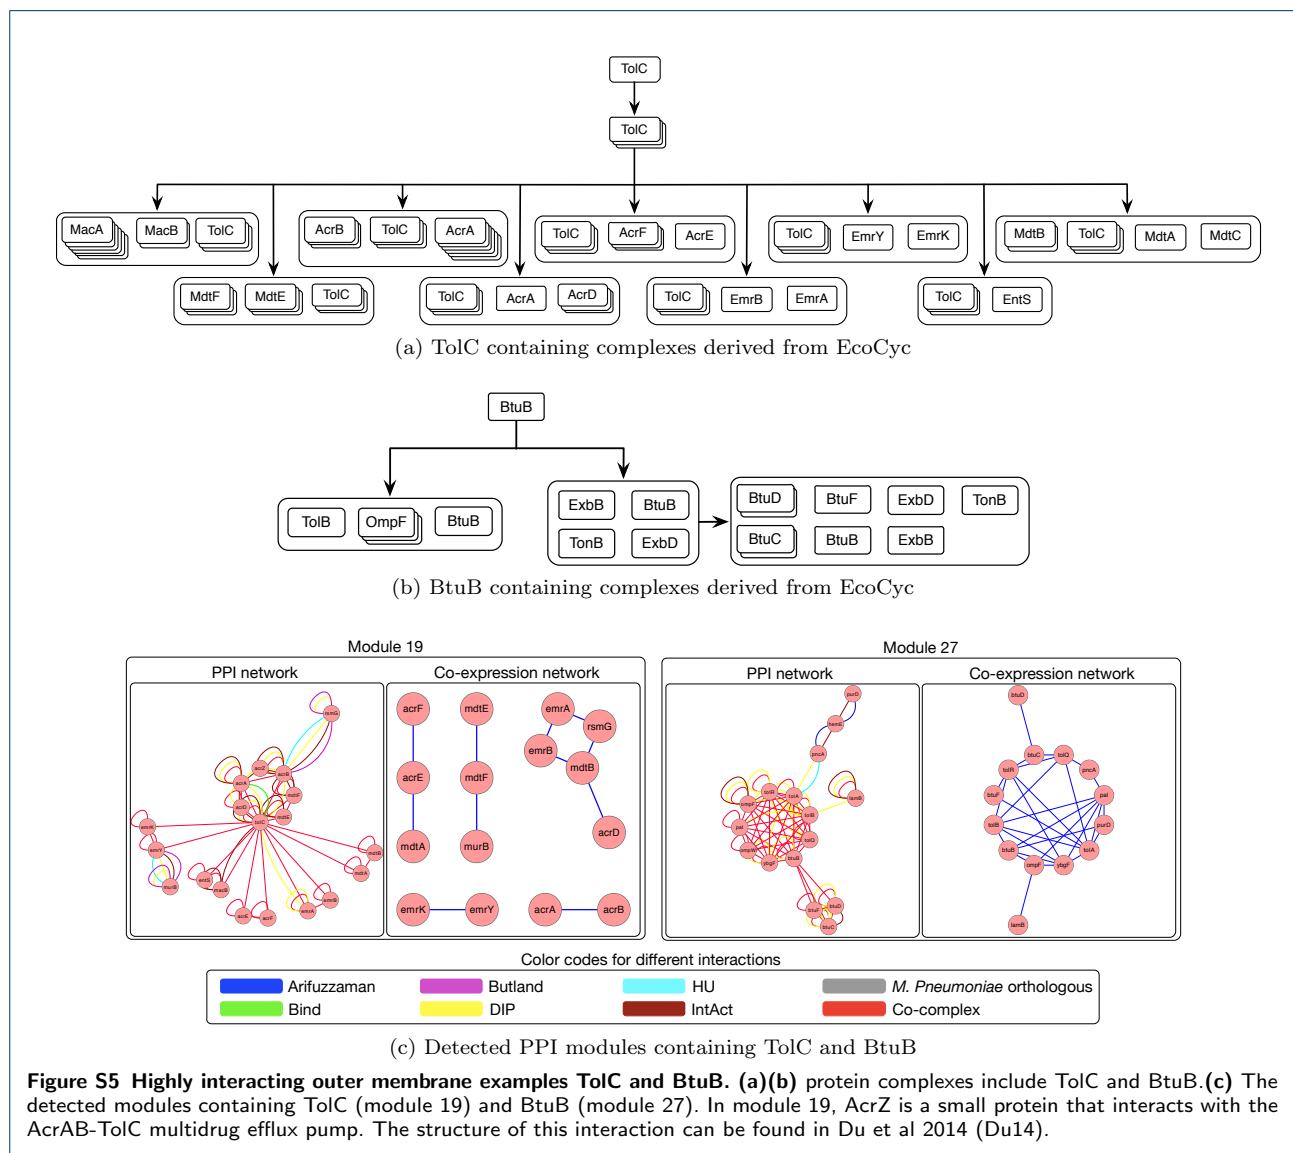

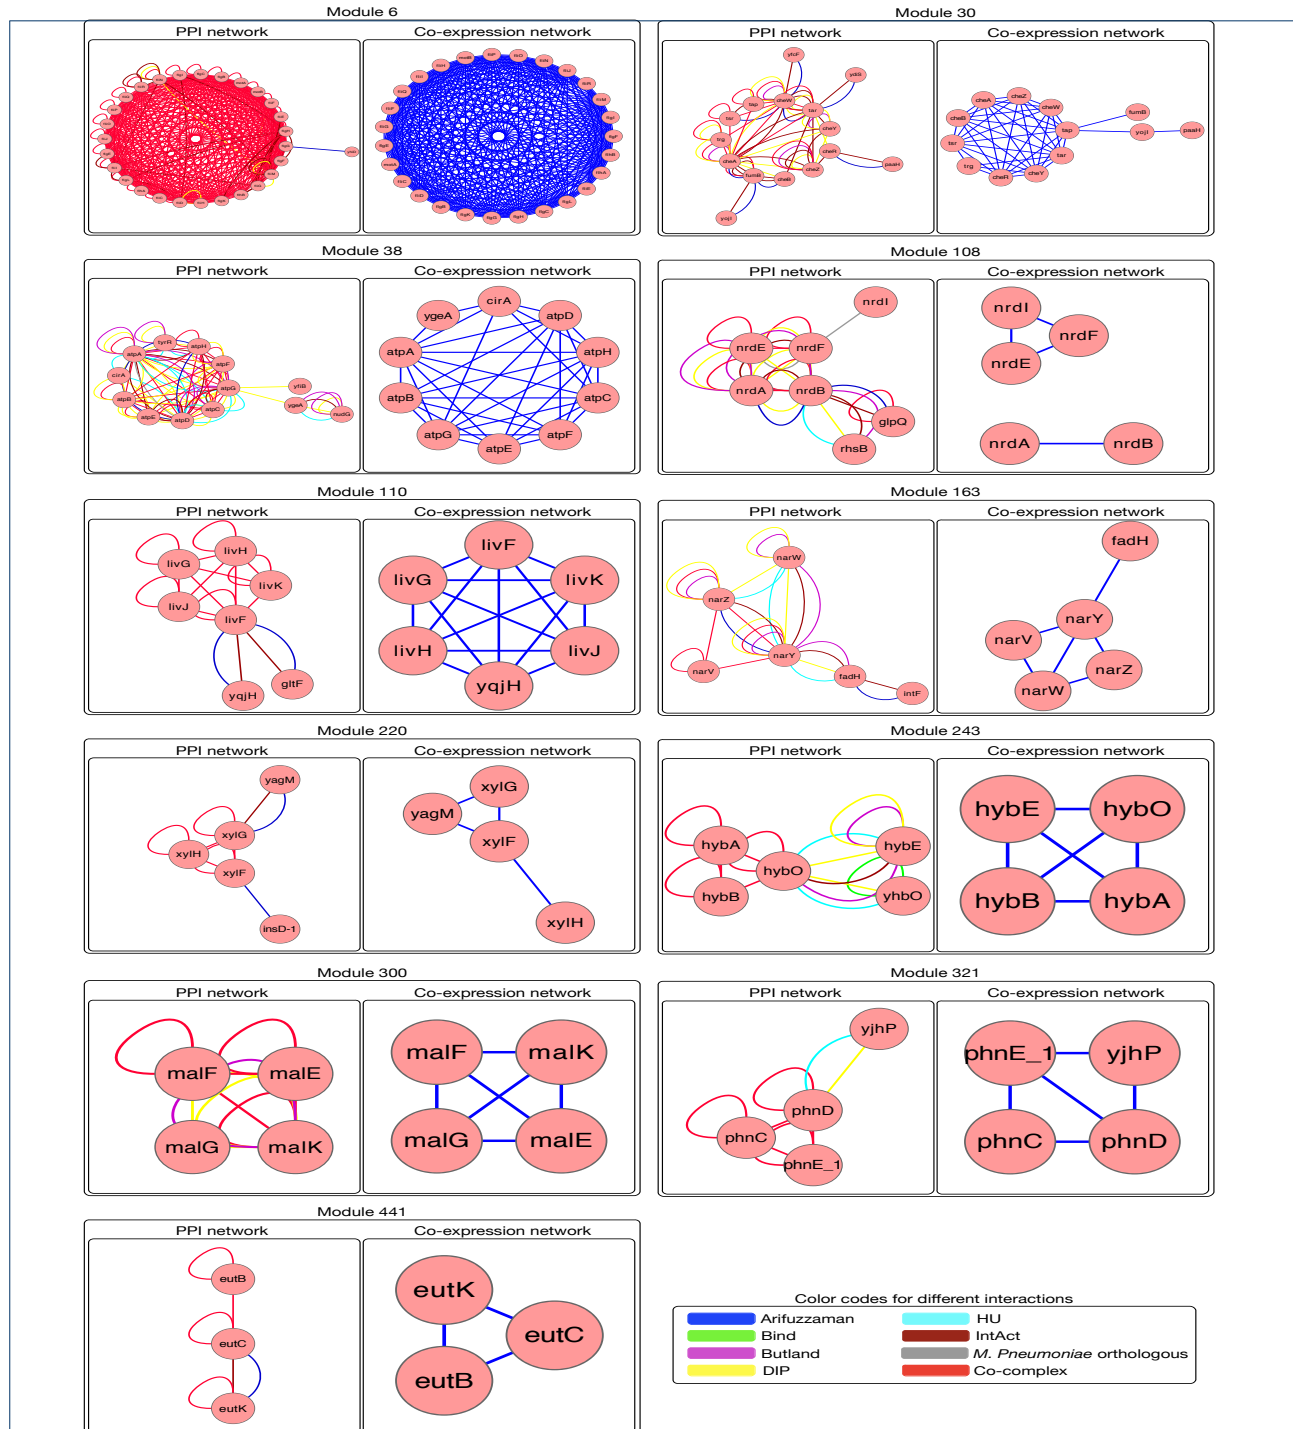

**Figure S6** Detected modules with a single complex as their cores. **Module 6 and 30 Flagella example:** In module 6 yhiD does not co-expressed with other Flagellar proteins and not interact. In module 30, CheY, CheZ, CheR, CheB has flagella related function and are highly co-expressed with other flagella genes. They will probably interact and form complex. **Module 38 Transporter ATP synthase / thiamin triphosphate synthase complex:** Outer membrane protein CirA highly co-expressed with this complex and probably interacts with as predicted by Hu et al 2009. YgeA is another outer membrane protein which shows some co-expression with the complex and has potential to interact. **Module 108 ribonucleotide complexes:** This module contains two protein complexes [(NrdA)2(nrdB)2] and [(NrdE)2(nrdF)2]. These two homologous complexes are not co-expressed and probably never interact. nrdI gene is in the same operon with nrdE and nrdF genes (nrdHIEF operon). NrdI probably interacts [(NrdE) 2(nrdF)2] complex. **D. amino acid transport example:** LivFGHMJ and LivFGHMK are two ATP-dependent high-affinity branched-chain amino acid transport systems including two different complexes: [LivF][LivG][LivH][LivM][LivJ] and [LivK][LivM][LivH][LivG][LivF]. YqjH has potential to interact with these complexes as it also co-expressed with their genes. **Module 163 Transporter nitrate reductase Z complex:** Protein NarW probably interacts with [NarY][NarZ][NarV] complex as narW gene is in the same operon (NarZYWV operon) with other genes, constituting this protein complex. FadH has also potential to interact with the complex as previously predicted by Hu et al 2009. **Module 220 xylose ABC transporter complex:** YagM protein has the potential to interact with The complex [XylG]2[XylH]2[XylF] and also co-expressed with it. **Module 243 hydrogenase 2 complex.** hybE and hybO are in the same operon (hybOABCEFG operon) with genes constituting hydrogenase 2 complex [HybA][HybB][HybO][HybC], and probably interact with the complex. **Module 300 maltose ABC complex:** MalG is part of the complex [MalK]2[MalF][MalG][MalE]. **Module 321 phosphonate ABC transporter complex:** membrane protein YjhP has the potential to interact with the phosphonate ABC transporter complex [PhnC]2[PhnE]2[PhnD] as it also co-expressed with the complex constituting genes. **Module 441 ethanolamine ammonia-lyase complex:** EutK may interact with ethanolamine ammonia-lyase complex [EutB]6[EutC]6 as all genes are located in a single operon (eutBCLKR operon).



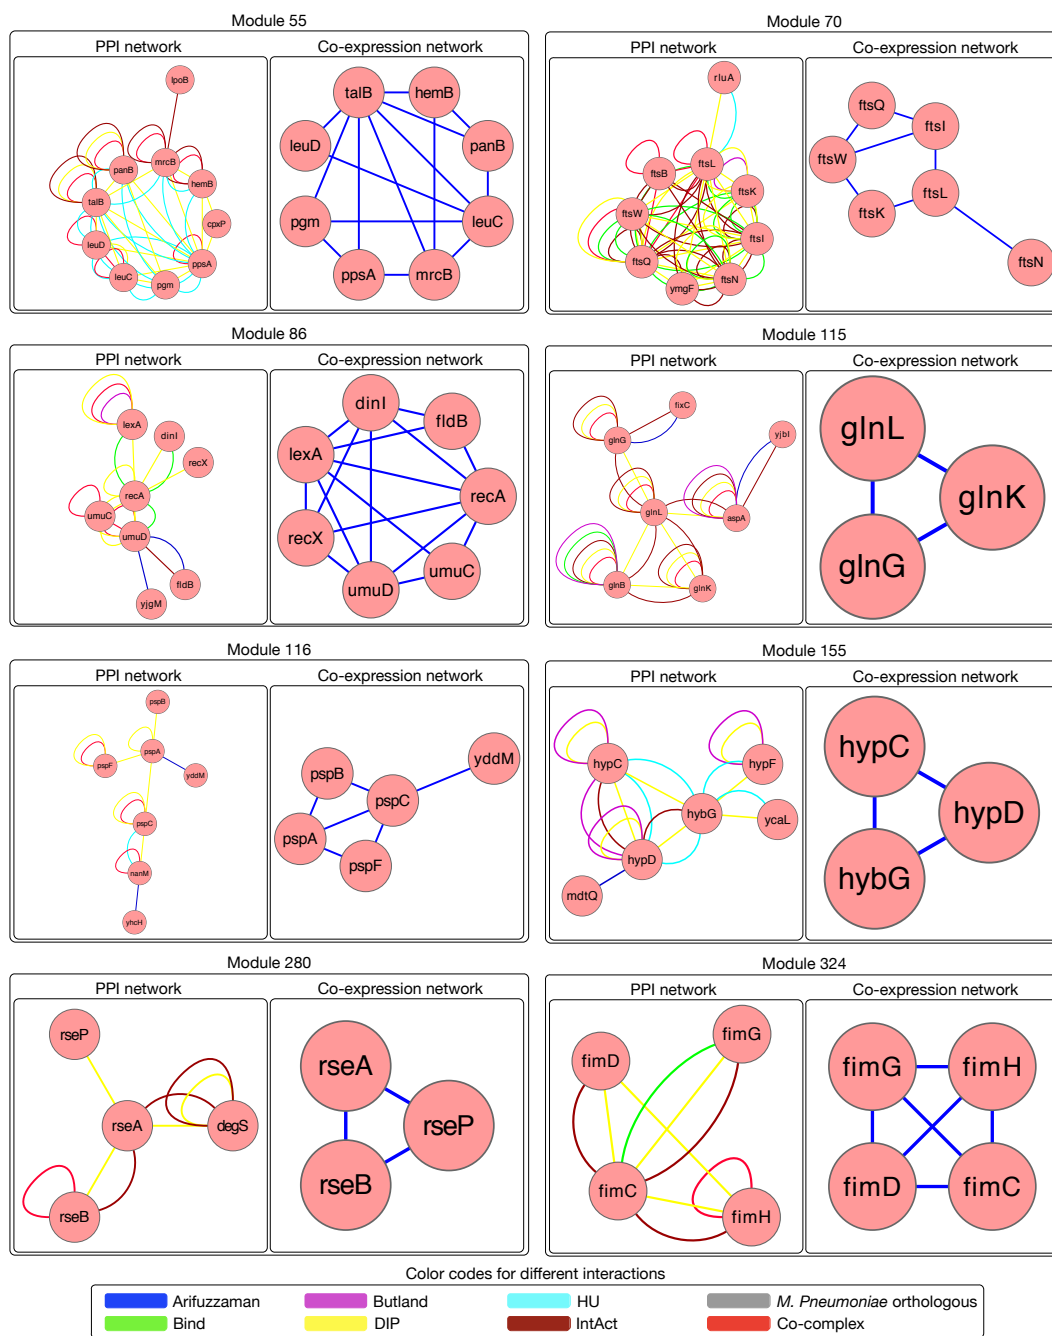

**Figure S7** Detected modules as possible new complexes. **Module 55:** This module was previously predicted by Hu et al 2009. They predicted that highly co-expressed and interacting proteins PanB, MrcB, LeuD, TalB, PpsA, Pgm, LeuC can make a complex. We predict that HemB is part of this complex as it highly interact with other proteins and co-expressed with them. cpxP may also interacts although it does not show co-expression with other genes. **Module 70:** This Module consists of highly interacting and co-expressed proteins with the function related to cell division. **Module 86:** SOS response related proteins that are highly interacting, co-expressed, and regulated by LexA transcription factor. **Module 115:** Nitrogen fixation related proteins including transcriptions factor and kinase proteins. **Module 116:** Highly interacting phage shock proteins from psp operon. They probably form a complex. **Module 155:** Recently HypCD complex involved in hydrogenase maturation = [HypD][HypC] have been purified which is required for biosynthesis of Fe(CN)<sub>2</sub>CO cofactor. It is possible that more proteins interact in this module. A similar module has been predicted by Hu et al 2009. **Module 280:** From EcoCyc literature: RseB interacts RseA (the anti-sigma factor that inhibits sigma E). DegS and RseP catalyze proteolytic cleavage of RseA while RseB binds to the RseA and prevents DegS from cleaving RseA. **Module 324 Pilus assembly:** The complete description of the complex available in Literature Geibel et al 2013.

Table S1: **Central proteins in detected modules.** Module number of modules with central protein(s) are listed in the first column. The total number of protein in the module and the central proteins are written in the second and third columns, respectively. Number of connections of each central protein, function of the central protein and essentiality of the central protein are appeared in the fourth, fifth, and sixth column respectively. In the last column Y and N means essentiality and non-essentiality of the central proteins, respectively. The data derived from Baba et al 2006. Some central proteins marked as P in the last column, these proteins are either conditionally essential or essential some strains of *E. coli*. The partially essential proteins are deduced through literature mining from EcoCyc database.

| Module number | Total number of coding genes inside the module | Central protein(s) | Number of connection for central protein(s) | Function of the central protein(s)                      | Essentiality |
|---------------|------------------------------------------------|--------------------|---------------------------------------------|---------------------------------------------------------|--------------|
| 1             | 180                                            | GroL               | 137                                         | Chaperone protein                                       | Y            |
| 1             | 180                                            | Dld                | 5                                           | Membrane Protein                                        | N            |
| 2             | 99                                             | RplA               | 58                                          | Ribosomal protein                                       | N            |
| 2             | 99                                             | RplB               | 60                                          | Ribosomal protein                                       | Y            |
| 2             | 99                                             | RplC               | 56                                          | Ribosomal protein                                       | Y            |
| 2             | 99                                             | RplD               | 58                                          | Ribosomal protein                                       | Y            |
| 2             | 99                                             | RplI               | 45                                          | Ribosomal protein                                       | N            |
| 2             | 99                                             | RplM               | 54                                          | Ribosomal protein                                       | Y            |
| 2             | 99                                             | RplO               | 43                                          | Ribosomal protein                                       | Y            |
| 2             | 99                                             | rplP               | 42                                          | Ribosomal protein                                       | Y            |
| 2             | 99                                             | RplQ               | 51                                          | Ribosomal protein                                       | Y            |
| 2             | 99                                             | RplT               | 44                                          | Ribosomal protein                                       | Y            |
| 2             | 99                                             | RplU               | 49                                          | Ribosomal protein                                       | Y            |
| 2             | 99                                             | RplV               | 53                                          | Ribosomal protein                                       | Y            |
| 2             | 99                                             | RplX               | 47                                          | Ribosomal protein                                       | Y            |
| 2             | 99                                             | RpmB               | 56                                          | Ribosomal protein                                       | Y            |
| 2             | 99                                             | RluB               | 44                                          | RNA modification / 23S rRNA pseudouridine 2605 synthase | N            |
| 3             | 69                                             | DnaJ               | 9                                           | Chaperone protein                                       | N            |
| 3             | 69                                             | MreB               | 10                                          | Cell division / Cytoskeleton protein                    | Y            |
| 3             | 69                                             | RpsB               | 13                                          | Ribosomal protein                                       | Y            |
| 3             | 69                                             | RpsE               | 10                                          | Ribosomal protein                                       | Y            |
| 3             | 69                                             | RpsG               | 9                                           | Ribosomal protein                                       | Y            |
| 3             | 69                                             | TufA               | 33                                          | elongation factor Tu                                    | -            |
| 3             | 69                                             | TufB               | 32                                          | elongation factor Tu                                    | -            |
| 4             | 53                                             | DnaK               | 34                                          | Chaperone protein                                       | N            |
| 5             | 49                                             | NadE               | 33                                          | de novo biosynthesis and salvage of NAD+ enzyme         | Y            |
| 5             | 49                                             | FusA               | 9                                           | Elongation factor G                                     | Y            |
| 7             | 27                                             | SecA               | 18                                          | Secretion protein                                       | Y            |
| 7             | 27                                             | SecB               | 10                                          | Chaperone/secretion protein                             | N            |
| 8             | 25                                             | CspC               | 10                                          | RNA or single stranded DNA binding protein              | N            |
| 8             | 25                                             | RhlE               | 5                                           | Ribosome-associated factor                              | N            |
| 9             | 25                                             | RfaD               | 11                                          | Membrane protein                                        | N            |

Continued on next page

Table S1: **Central proteins in detected modules.** Module number of modules with central protein(s) are listed in the first column. The total number of protein in the module and the central proteins are written in the second and third columns, respectively. Number of connections of each central protein, function of the central protein and essentiality of the central protein are appeared in the fourth, fifth, and sixth column respectively. In the last column Y and N means essentiality and non-essentiality of the central proteins, respectively. The data derived from Baba *et al* 2006. Some central proteins marked as P in the last column, these proteins are either conditionally essential or essential some strains of *E. coli*. The partially essential proteins are deduced through literature mining from EcoCyc database. (Continued from previous page)

| Module number | Total number of coding genes inside the module | Central protein(s) | Number of connection for central protein(s) | Function of the central protein(s)                    | Essentiality |
|---------------|------------------------------------------------|--------------------|---------------------------------------------|-------------------------------------------------------|--------------|
| 9             | 25                                             | RimJ               | 6                                           | ribosomal-protein-S5-alanine acetyltransferase enzyme | N- N         |
| 10            | 25                                             | GroS               | 16                                          | Chaperone protein                                     | Y            |
| 11            | 23                                             | WbbK               | 10                                          | Membrane protein                                      | N            |
| 12            | 23                                             | RcsB               | 12                                          | Kinase activity                                       | N            |
| 12            | 23                                             | GfcD               | 6                                           | Membrane protein                                      | N            |
| 13            | 23                                             | YbgI               | 6                                           | Metal-binding protein                                 | N            |
| 13            | 23                                             | PdxB               | 4                                           | Erythronate-4-phosphate dehydrogenase enzyme          | P            |
| 13            | 23                                             | YcgG               | 9                                           | Membrane protein                                      | N            |
| 14            | 21                                             | RpoB               | 10                                          | RNA polymerase                                        | Y            |
| 14            | 21                                             | RhsE               | 8                                           | Self proteolysis                                      | N            |
| 15            | 21                                             | DnaN               | 12                                          | DNA polymerase III                                    | Y            |
| 16            | 20                                             | DnaB               | 10                                          | Primosome protein                                     | Y            |
| 18            | 19                                             | MetN               | 7                                           | Membrane protein                                      | N            |
| 18            | 19                                             | YhjB               | 6                                           | Kinase activity                                       | N            |
| 19            | 19                                             | TolC               | 15                                          | Membrane protein                                      | N            |
| 20            | 18                                             | AcpP               | 10                                          | interact with 12 different <i>E. coli</i> enzymes     | Y            |
| 21            | 18                                             | SlyD               | 10                                          | Chaperone protein                                     | P            |
| 21            | 18                                             | UlaF               | 6                                           | L-ribulose 5-phosphate 4-epimerase enzyme             | N            |
| 22            | 18                                             | RplL               | 8                                           | Ribosomal protein                                     | Y            |
| 22            | 18                                             | YgeR               | 4                                           | Membrane protein                                      | N            |
| 23            | 18                                             | FrdA               | 9                                           | Membrane protein                                      | N            |
| 23            | 18                                             | HemG               | 6                                           | Membrane protein                                      | Y            |
| 24            | 17                                             | GcvP               | 10                                          | Glycine decarboxylase enzyme                          | N            |
| 25            | 17                                             | MrcA               | 4                                           | Cell division/ Membrane protein                       | N            |
| 25            | 17                                             | OsmC               | 4                                           | osmotically inducible peroxiredoxin enzyme            | N            |
| 26            | 16                                             | PurR               | 5                                           | Transcription factor                                  | N            |
| 26            | 16                                             | KdgR               | 8                                           | Transcription factor                                  | N            |
| 28            | 16                                             | YjtD               | 6                                           | rRNA methyltransferase                                | N            |
| 28            | 16                                             | ClpB               | 8                                           | Chaperone protein                                     | N            |
| 29            | 16                                             | IbpA               | 8                                           | Chaperone protein                                     | N            |
| 30            | 15                                             | CheA               | 9                                           | Kinase activity                                       | N            |

Continued on next page

Table S1: **Central proteins in detected modules.** Module number of modules with central protein(s) are listed in the first column. The total number of protein in the module and the central proteins are written in the second and third columns, respectively. Number of connections of each central protein, function of the central protein and essentiality of the central protein are appeared in the fourth, fifth, and sixth column respectively. In the last column Y and N means essentiality and non-essentiality of the central proteins, respectively. The data derived from Baba et al 2006. Some central proteins marked as P in the last column, these proteins are either conditionally essential or essential some strains of *E. coli*. The partially essential proteins are deduced through literature mining from EcoCyc database. (Continued from previous page)

| Module number | Total number of coding genes inside the module | Central protein(s) | Number of connection for central protein(s) | Function of the central protein(s)                                   | Essentiality |
|---------------|------------------------------------------------|--------------------|---------------------------------------------|----------------------------------------------------------------------|--------------|
| 30            | 15                                             | Tar                | 7                                           | Kinase activity/Membrane protein                                     | N            |
| 31            | 15                                             | ProA               | 5                                           | Kinase activity                                                      | P            |
| 31            | 15                                             | SfsA               | 4                                           | Transcription factor                                                 | N            |
| 31            | 15                                             | YehT               | 5                                           | Kinase activity                                                      | N            |
| 32            | 15                                             | Tig                | 11                                          | Chaperone protein                                                    | N            |
| 33            | 15                                             | LysS               | 8                                           | tRNA synthetase                                                      | N            |
| 33            | 15                                             | RhaS               | 4                                           | Transcription factor                                                 | N            |
| 34            | 14                                             | NapC               | 12                                          | Membrane protein                                                     | N            |
| 36            | 13                                             | DnaE               | 10                                          | DNA polymerase protein                                               | Y            |
| 37            | 13                                             | FkpB               | 8                                           | Chaperone protein                                                    | N            |
| 37            | 13                                             | IntA               | 9                                           | CP4-57 prophage; integrase                                           | N            |
| 40            | 13                                             | YbhK               | 6                                           | Predicted transferase with NAD(P)-binding Rossmann-fold domain       | N            |
| 41            | 13                                             | ParE               | 8                                           | Topoisomerase protein                                                | Y            |
| 42            | 12                                             | PheA               | 6                                           | Chorismate mutase / prephenate dehydratase enzyme                    | P            |
| 42            | 12                                             | PrfA               | 5                                           | Translation/ Release of the growing polypeptide chain at stop codons | Y            |
| 43            | 12                                             | DsbA               | 9                                           | Chaperone protein                                                    | N            |
| 44            | 12                                             | SucC               | 5                                           | Succinyl-CoA synthetase protein                                      | N            |
| 45            | 12                                             | YgaM               | 5                                           | Membrane protein                                                     | N            |
| 46            | 11                                             | SdhA               | 10                                          | Membrane protein                                                     | N            |
| 47            | 11                                             | YdhX               | 4                                           | Membrane protein                                                     | N            |
| 48            | 11                                             | DusC               | 6                                           | tRNA synthetase                                                      | N            |
| 49            | 11                                             | EutQ               | 4                                           | Uncharacterized protein                                              | N            |
| 49            | 11                                             | IspA               | 5                                           | Geranyl diphosphate synthase / farnesyl diphosphate synthase enzyme  | Y            |
| 50            | 11                                             | RpoC               | 5                                           | RNA polymerase protein                                               | Y            |
| 51            | 11                                             | Crr                | 7                                           | Kinase activity/ Membrane protein                                    | P            |
| 53            | 10                                             | SelD               | 4                                           | Kinase activity                                                      | N            |
| 53            | 10                                             | Rpe                | 4                                           | Ribulose-5-phosphate 3-epimerase enzyme                              | N            |
| 54            | 10                                             | PmbA               | 5                                           | Chaperone protein                                                    | N            |
| 55            | 10                                             | PpsA               | 8                                           | Kinase activity                                                      | N            |
| 56            | 10                                             | AceE               | 7                                           | Membrane protein                                                     | N            |
| 57            | 10                                             | TatE               | 7                                           | Membrane protein                                                     | N            |

Continued on next page

Table S1: **Central proteins in detected modules.** Module number of modules with central protein(s) are listed in the first column. The total number of protein in the module and the central proteins are written in the second and third columns, respectively. Number of connections of each central protein, function of the central protein and essentiality of the central protein are appeared in the fourth, fifth, and sixth column respectively. In the last column Y and N means essentiality and non-essentiality of the central proteins, respectively. The data derived from Baba et al 2006. Some central proteins marked as P in the last column, these proteins are either conditionally essential or essential some strains of *E. coli*. The partially essential proteins are deduced through literature mining from EcoCyc database. (Continued from previous page)

| Module number | Total number of coding genes inside the module | Central protein(s) | Number of connection for central protein(s) | Function of the central protein(s)                                                                                     | Essentiality |
|---------------|------------------------------------------------|--------------------|---------------------------------------------|------------------------------------------------------------------------------------------------------------------------|--------------|
| 58            | 10                                             | IscU               | 6                                           | Chaperone protein                                                                                                      | N            |
| 59            | 10                                             | YdfG               | 7                                           | 3-hydroxy acid dehydrogenase enzyme                                                                                    | N            |
| 61            | 10                                             | ClpP               | 8                                           | proteases, cleavage of compounds/<br>Membrane protein                                                                  | N            |
| 62            | 10                                             | HolC               | 5                                           | DNA polymerase III                                                                                                     | N            |
| 63            | 10                                             | ChbA               | 8                                           | Phosphotransferase Systems (PEP-dependent PTS)                                                                         | N            |
| 65            | 9                                              | HslU               | 6                                           | Chaperone protein                                                                                                      | N            |
| 66            | 9                                              | DeaD               | 4                                           | Ribosomal protein                                                                                                      | N            |
| 67            | 9                                              | RibD               | 5                                           | Fused diaminohydroxyphosphoribosylaminopyrimidine deaminase / 5-amino-6-(5-phosphoribosylamino)uracil reductase enzyme | Y            |
| 68            | 9                                              | YdfZ               | 4                                           | Uncharacterized protein                                                                                                | N            |
| 71            | 9                                              | YgfK               | 5                                           | Uncharacterized protein                                                                                                | N            |
| 72            | 9                                              | HsdM               | 5                                           | Methylation                                                                                                            | N            |
| 73            | 9                                              | Atl                | 4                                           | DNA repair                                                                                                             | N            |
| 74            | 9                                              | GabT               | 5                                           | 4-aminobutyrate aminotransferase enzyme                                                                                | N            |
| 75            | 9                                              | LepA               | 4                                           | elongation factor 4                                                                                                    | N            |
| 75            | 9                                              | PsuG               | 4                                           | predicted pseudouridine 5'-phosphate glycosidase                                                                       | N            |
| 76            | 8                                              | LysU               | 5                                           | tRNA synthetase                                                                                                        | N            |
| 77            | 8                                              | PepD               | 7                                           | proteolysis                                                                                                            | N            |
| 79            | 8                                              | YghW               | 6                                           | Uncharacterized protein                                                                                                | N            |
| 81            | 8                                              | BluR               | 4                                           | Transcription factor                                                                                                   | N            |
| 82            | 8                                              | CusR               | 4                                           | Kinase activity                                                                                                        | N            |
| 82            | 8                                              | CusS               | 4                                           | Kinase activity                                                                                                        | N            |
| 83            | 8                                              | LpxD               | 5                                           | UDP-3-O-(R-3-hydroxymyristoyl)-glucosamine N-acyltransferase enzyme                                                    | Y            |
| 85            | 8                                              | YkfJ               | 4                                           | Uncharacterized protein                                                                                                | N            |
| 86            | 8                                              | RecA               | 5                                           | SOS response                                                                                                           | N            |
| 88            | 8                                              | FolA               | 5                                           | dihydrofolate reductase enzyme                                                                                         | Y            |
| 90            | 8                                              | TypA               | 6                                           | Ribosomal protein                                                                                                      | N            |
| 91            | 8                                              | MazE               | 5                                           | toxin-antitoxin system                                                                                                 | N            |

Continued on next page

Table S1: **Central proteins in detected modules.** Module number of modules with central protein(s) are listed in the first column. The total number of protein in the module and the central proteins are written in the second and third columns, respectively. Number of connections of each central protein, function of the central protein and essentiality of the central protein are appeared in the fourth, fifth, and sixth column respectively. In the last column Y and N means essentiality and non-essentiality of the central proteins, respectively. The data derived from Baba et al 2006. Some central proteins marked as P in the last column, these proteins are either conditionally essential or essential some strains of *E. coli*. The partially essential proteins are deduced through literature mining from EcoCyc database. (Continued from previous page)

| Module number | Total number of coding genes inside the module | Central protein(s) | Number of connection for central protein(s) | Function of the central protein(s)             | Essentiality |
|---------------|------------------------------------------------|--------------------|---------------------------------------------|------------------------------------------------|--------------|
| 93            | 8                                              | RsfS               | 4                                           | ribosomal silencing factor                     | N            |
| 94            | 7                                              | GalF               | 4                                           | redicted uridylyltransferase subunit with GalU | N            |
| 95            | 7                                              | TopB               | 4                                           | DNA topoisomerase III                          | N            |
| 96            | 7                                              | HtpG               | 5                                           | Chaperone protein                              | N            |
| 98            | 7                                              | RffM               | 5                                           | surface antigens                               | N            |
| 99            | 7                                              | RlmN               | 6                                           | rRNA methyltransferase/tRNA methyltransferase  | N            |
| 100           | 7                                              | UlaR               | 4                                           | Transcription factor                           | N            |
| 103           | 7                                              | ThrS               | 4                                           | tRNA synthetase                                | Y            |
| 104           | 7                                              | GltA               | 4                                           | citrate synthase enzyme                        | P            |
| 106           | 7                                              | YfbN               | 4                                           | Uncharacterized protein                        | N            |
| 109           | 7                                              | AlIE               | 4                                           | S-ureidoglycine aminohydrolase enzyme          | N            |
| 111           | 7                                              | DhaM               | 4                                           | Kinase activity                                | N            |
| 112           | 7                                              | MtlD               | 5                                           | mannitol-1-phosphate 5-dehydrogenase enzyme    | N            |
| 113           | 7                                              | YebC               | 5                                           | Uncharacterized protein                        | N            |
| 116           | 7                                              | PspA               | 4                                           | Prophage and phage related                     | N            |
| 118           | 7                                              | TrpA               | 4                                           | tryptophan synthase enzyme                     | P            |
| 119           | 7                                              | OmpR               | 4                                           | Transcription factor                           | N            |
| 120           | 7                                              | TalA               | 5                                           | transaldolase A enzyme                         | N            |
| 121           | 7                                              | DapD               | 6                                           | tetrahydrodipicolinate succinylase enzyme      | Y            |
| 122           | 7                                              | fau                | 5                                           | Ligase activity                                | N            |
| 124           | 6                                              | YhcC               | 4                                           | Uncharacterized protein                        | N            |
| 128           | 6                                              | YibA               | 4                                           | predicted lyase containing HEAT-repeat         | N            |
| 132           | 6                                              | SerS               | 4                                           | tRNA synthetase                                | Y            |
| 136           | 6                                              | GlpD               | 5                                           | Membrane protein                               | P            |
| 137           | 6                                              | IscS               | 4                                           | tRNA synthetase                                | P            |
| 141           | 6                                              | YmfD               | 4                                           | Uncharacterized protein                        | N            |
| 144           | 6                                              | YggD               | 5                                           | Uncharacterized protein                        | N            |
| 149           | 6                                              | YaiA               | 4                                           | Uncharacterized protein                        | N            |
| 151           | 6                                              | TrpE               | 5                                           | Lyase activity                                 | P            |
| 154           | 6                                              | RfbD               | 4                                           | surface antigens                               | N            |

Continued on next page

Table S1: **Central proteins in detected modules.** Module number of modules with central protein(s) are listed in the first column. The total number of protein in the module and the central proteins are written in the second and third columns, respectively. Number of connections of each central protein, function of the central protein and essentiality of the central protein are appeared in the fourth, fifth, and sixth column respectively. In the last column Y and N means essentiality and non-essentiality of the central proteins, respectively. The data derived from Baba et al 2006. Some central proteins marked as P in the last column, these proteins are either conditionally essential or essential some strains of *E. coli*. The partially essential proteins are deduced through literature mining from EcoCyc database. (Continued from previous page)

| Module number | Total number of coding genes inside the module | Central protein(s) | Number of connection for central protein(s) | Function of the central protein(s)                         | Essentiality |
|---------------|------------------------------------------------|--------------------|---------------------------------------------|------------------------------------------------------------|--------------|
| 156           | 6                                              | PrmA               | 5                                           | Methylation                                                | N            |
| 157           | 6                                              | BglG               | 4                                           | Kinase activity                                            | N            |
| 159           | 6                                              | FtsE               | 5                                           | Membrane protein                                           | Y            |
| 160           | 6                                              | YciA               | 5                                           | acyl-CoA thioesterase enzyme                               | N            |
| 161           | 6                                              | MqsR               | 5                                           | toxin-antitoxin system                                     | N            |
| 166           | 6                                              | YqjG               | 4                                           | S-glutathionyl-(chloro)hydroquinone reductase enzyme       | N            |
| 167           | 6                                              | RsgA               | 5                                           | Ribosomal protein                                          | N            |
| 169           | 6                                              | NrdD               | 5                                           | ribonucleoside-triphosphate reductase enzyme               | N            |
| 176           | 5                                              | RplW               | 4                                           | Ribosomal protein                                          | Y            |
| 179           | 5                                              | Blc                | 4                                           | Membrane protein                                           | N            |
| 181           | 5                                              | YkgC               | 4                                           | hypochlorite stress response                               | N            |
| 182           | 5                                              | YciH               | 4                                           | Ribosomal protein                                          | N            |
| 186           | 5                                              | MetL               | 3                                           | Kinase activity                                            | P            |
| 190           | 5                                              | YbaB               | 4                                           | DNA-binding protein                                        | N            |
| 191           | 5                                              | YccS               | 4                                           | Membrane protein                                           | N            |
| 192           | 5                                              | KdsB               | 4                                           | 3-deoxy-D-manno-octulosonate cytidyltransferase enzyme     | Y            |
| 202           | 5                                              | GlmS               | 4                                           | L-glutamine:D-fructose-6-phosphate aminotransferase enzyme | Y            |
| 205           | 5                                              | HyaE               | 4                                           | Chaperone protein                                          | N            |
| 219           | 5                                              | RcbA               | 4                                           | Prophage and phage related                                 | N            |
| 224           | 5                                              | RarA               | 4                                           | recombination factor                                       | N            |
| 226           | 5                                              | TtdR               | 4                                           | Transcription factor                                       | N            |
| 233           | 5                                              | FklB               | 4                                           | Chaperone protein                                          | N            |
| 234           | 5                                              | RluD               | 4                                           | Ribosomal protein                                          | N            |
| 235           | 5                                              | YoaH               | 4                                           | Uncharacterized protein                                    | N            |
| 240           | 5                                              | EutD               | 4                                           | phosphate acetyltransferase enzyme                         | N            |

Table S2: **Protein complexes constituting from more than one kind of protein (hetero-oligomer) and the detected PPI module(s) entailing their proteins.**

| Protein Complex                                                 | Detected PPI Module |
|-----------------------------------------------------------------|---------------------|
| &gamma;-glutamyl kinase-GP-reductase multienzyme complex        | 31                  |
| 2,3-diketo-L-gulonate:Na<sup></sup> + </sup> symporter          | 604                 |
| 2-dehydro-3-deoxyphosphoheptonate aldolase                      | 1                   |
| 2-oxoglutarate dehydrogenase complex                            | 269, 78             |
| 3-phenylpropionate dioxygenase system                           | 327                 |
| 4-amino-4-deoxychorismate synthase                              | 143                 |
| 50S ribosomal protein complex L8                                | 2, 22               |
| <I>Eco</I>KI restriction-modification system                    | 72                  |
| <I>N</I>-acetyl-D-galactosamine PTS transporter                 | 496                 |
| <i>p</i>-aminobenzoyl-glutamate hydrolase                       | 472                 |
| <i>para</i>-aminobenzoate synthase multi-enzyme complex         | 143                 |
| acetoacetyl-CoA transferase                                     | 399                 |
| acetohydroxybutanoate synthase / acetolactate synthase          | 170                 |
| acetolactate synthase / acetohydroxybutanoate synthase          | 326, 492            |
| acetyl-CoA carboxylase                                          | 2, 343, 65          |
| acetyl-CoA carboxyltransferase                                  | 2, 343              |
| AcrAB-TolC multidrug efflux transport system                    | 19                  |
| AcrAD-TolC multidrug efflux transport system                    | 19                  |
| AcrEF-TolC multidrug efflux transport system                    | 19                  |
| aerobic fatty acid oxidation complex                            | 262                 |
| aldehyde dehydrogenase                                          | 325                 |
| aliphatic sulfonate ABC transporter                             | 467                 |
| alkylhydroperoxide reductase                                    | 259, 200            |
| anaerobic fatty acid oxidation complex                          | 180                 |
| anaerobic nucleoside-triphosphate reductase activating system   | 169                 |
| anthranilate synthase                                           | 151                 |
| arabinose ABC transporter                                       | 385                 |
| arginine ABC transporter                                        | 87                  |
| aspartate kinase / homoserine dehydrogenase                     | 186                 |
| aspartate transcarbamylase                                      | 578                 |
| ATP synthase                                                    | 38                  |
| ATP synthase F<sub>0</sub> complex                              | 38                  |
| ATP synthase F<sub>1</sub> complex                              | 38                  |
| autoinducer-2 ABC transporter                                   | 125                 |
| bifunctional CysEK cysteine biosynthesis complex                | 538                 |
| branched chain amino acid ABC transporter                       | 110                 |
| capsular polysaccharide export apparatus                        | 583                 |
| carbamoyl phosphate synthetase                                  | 51, 225             |
| CcmCDE protoheme IX reservoir complex                           | 60                  |
| CcmEFGH holocytochrome <I>c</I> synthetase                      | 60                  |
| chemotaxis signaling complex - aspartate sensing                | 30                  |
| chemotaxis signaling complex - dipeptide sensing                | 30                  |
| chemotaxis signaling complex - ribose/galactose/glucose sensing | 30                  |
| chemotaxis signaling complex - serine sensing                   | 30                  |
| chitobiose / cellobiose PTS permease                            | 63                  |
| ChpB-ChpS complex                                               | 524                 |

Continued on next page



Table S2: **Protein complexes constituting from one kind of protein, and the detected PPI module(s) entailing their proteins (Continued from previous page)**

| <b>Protein Complex</b>                                                      | <b>Detected PPI Module</b> |
|-----------------------------------------------------------------------------|----------------------------|
| citrate lyase, inactive                                                     | 211                        |
| ClpAP                                                                       | 61, 296                    |
| ClpAXP                                                                      | 61, 296, 25                |
| ClpXP                                                                       | 61, 25                     |
| Colicin S4 Transport System                                                 | 27                         |
| complex involved in modification of tRNA                                    | 316, 139                   |
| connecting fragment of NADH dehydrogenase I                                 | 35                         |
| copper / silver efflux transport system                                     | 318                        |
| CRISPR-associated complex for antiviral defense                             | 221                        |
| curli secretion and assembly complex                                        | 423                        |
| cytochrome <i>bd</i> -I terminal oxidase                                    | 425                        |
| cytochrome <i>bd</i> -II terminal oxidase                                   | 504                        |
| cytochrome <i>bo</i> terminal oxidase                                       | 272                        |
| D-allose ABC transporter                                                    | 206                        |
| degradosome                                                                 | 87, 2, 259                 |
| dihydroxyacetone kinase                                                     | 111, 543                   |
| dimethyl sulfoxide reductase                                                | 426                        |
| DinJ-YafQ antitoxin/toxin complex and DNA-binding transcriptional repressor | 347                        |
| dipeptide ABC transporter                                                   | 294                        |
| DNA gyrase                                                                  | 195                        |
| DNA polymerase III, $\psi$ - $\chi$ ; subunit                               | 62                         |
| DNA polymerase III, core enzyme                                             | 36, 15                     |
| DNA polymerase III, holoenzyme                                              | 36, 15, 178, 62            |
| DNA polymerase III, preinitiation complex                                   | 36, 178                    |
| DNA polymerase V                                                            | 86                         |
| DnaJ/DnaK/GrpE                                                              | 3, 4, 418                  |
| DosC-DosP complex                                                           | 548                        |
| dTDP-L-rhamnose synthetase                                                  | 154                        |
| EfeU/EfeO/EfeB ferrous iron transporter; cryptic                            | 390                        |
| EmrAB-TolC multidrug efflux transport system                                | 19                         |
| EmrKY-TolC multidrug efflux transport system                                | 19                         |
| entericidin toxin-antitoxin complex                                         | 552                        |
| Enterobacterial Common Antigen Biosynthesis Protein Complex                 | 319                        |
| enterobactin synthase multienzyme complex                                   | 359                        |
| EntS-TolC Enterobactin Efflux Transport System                              | 19                         |
| ethanolamine ammonia-lyase                                                  | 441                        |
| evolved $\beta$ -D-galactosidase                                            | 551                        |
| exonuclease VII                                                             | 189                        |
| FecAR Signal Transduction System                                            | 123                        |
| ferric citrate outer membrane transport complex                             | 123, 273                   |
| ferric coprogen outer membrane transport complex                            | 117, 273                   |
| ferric coprogen transport system                                            | 117                        |
| ferric dicitrate ABC transporter                                            | 123                        |
| ferric dicitrate transport system                                           | 123                        |
| ferric enterobactin ABC transporter                                         | 218                        |
| ferric enterobactin outer membrane transport complex                        | 273, 218                   |
| ferric enterobactin transport system                                        | 218                        |

Continued on next page

Table S2: **Protein complexes constituting from one kind of protein, and the detected PPI module(s) entailing their proteins (Continued from previous page)**

| <b>Protein Complex</b>                                                      | <b>Detected PPI Module</b> |
|-----------------------------------------------------------------------------|----------------------------|
| ferrichrome outer membrane transport complex                                | 273, 117                   |
| ferrichrome transport system                                                | 117                        |
| fimbrial complex                                                            | 411, 324                   |
| Flagellar Export Apparatus                                                  | 6                          |
| Flagellar Motor Complex                                                     | 6                          |
| Flagellar Motor Switch Complex                                              | 6                          |
| Flagellum                                                                   | 6                          |
| FlhDC DNA-binding transcriptional dual regulator                            | 230                        |
| formate dehydrogenase-N                                                     | 252                        |
| formate dehydrogenase-O                                                     | 305                        |
| formate dependent nitrite reductase                                         | 171                        |
| formate hydrogenlyase complex                                               | 150                        |
| fructose PTS permease                                                       | 563                        |
| FtsE/FtsX ABC transporter                                                   | 159, 253                   |
| FtsLBQ cell division complex                                                | 70                         |
| fumarate reductase                                                          | 23                         |
| GadE-RcsB DNA binding transcriptional activator                             | 12                         |
| galactitol PTS permease                                                     | 193                        |
| galactofuranose / galactopyranose ABC transporter                           | 127                        |
| galactosamine PTS permease - cryptic                                        | 146                        |
| galactose ABC transporter                                                   | 456                        |
| GatR DNA-binding transcriptional repressor                                  | 567                        |
| glucitol/sorbitol PTS permease                                              | 468                        |
| glucose PTS permease                                                        | 403, 51                    |
| glutamate / aspartate ABC transporter                                       | 303                        |
| glutamate synthase                                                          | 396                        |
| glutamine ABC transporter                                                   | 270                        |
| glutathione / L-cysteine efflux transporter CydDC                           | 236                        |
| glutathione ABC transporter                                                 | 332                        |
| glycerol-3-phosphate / glycerol-2-phosphate ABC transporter                 | 338, 624                   |
| glycerol-3-phosphate-dehydrogenase, anaerobic                               | 288                        |
| glycine betaine / proline ABC transporter                                   | 312                        |
| glycine cleavage system                                                     | 78, 24                     |
| glycolate oxidase                                                           | 394                        |
| glycyl-tRNA synthetase                                                      | 195, 29                    |
| GroEL-GroES chaperonin complex                                              | 1, 10                      |
| Grx4-BolA complex                                                           | 404                        |
| GspC-O secretion complex                                                    | 460                        |
| HflB, integral membrane ATP-dependent zinc metallopeptidase                 | 361                        |
| HipB-HipA antitoxin/toxin complex and DNA-binding transcriptional repressor | 81                         |
| histidine ABC transporter                                                   | 89                         |
| HslVU protease                                                              | 65, 129                    |
| HU DNA-binding transcriptional dual regulator                               | 362, 274                   |
| hydrogenase 1                                                               | 383                        |
| hydrogenase 2                                                               | 243, 623                   |
| hydrogenase 3                                                               | 150                        |

Continued on next page

Table S2: **Protein complexes constituting from one kind of protein, and the detected PPI module(s) entailing their proteins (Continued from previous page)**

| <b>Protein Complex</b>                                                        | <b>Detected PPI Module</b> |
|-------------------------------------------------------------------------------|----------------------------|
| hydrogenase 4                                                                 | 39                         |
| hydroxylated aromatic carboxylic acid efflux transporter                      | 124                        |
| HypA-HypB heterodimer                                                         | 530                        |
| IHF DNA-binding transcriptional dual regulator                                | 362, 461                   |
| imidazole glycerol phosphate synthase                                         | 570                        |
| iron (III) hydroxamate ABC transporter                                        | 117                        |
| isopropylmalate isomerase                                                     | 55                         |
| K<sup></sup> + </sup> transporting ATPase                                     | 174                        |
| L-ascorbate PTS permease                                                      | 271                        |
| L-methionine / D-methionine ABC transporter                                   | 18, 152                    |
| L-tartrate dehydratase                                                        | 330                        |
| L-valine efflux transporter                                                   | 600                        |
| leucine ABC transporter                                                       | 110                        |
| LolCDE ABC lipoprotein transporter                                            | 406                        |
| longitudinal peptidoglycan synthesis/chromosome segregation-directing complex | 3                          |
| LptABCDFG ABC transporter                                                     | 172                        |
| lysine / arginine / ornithine ABC transporter                                 | 89                         |
| MacAB-TolC macrolide efflux transport system                                  | 19, 400                    |
| malate dehydrogenase                                                          | 298                        |
| MalT-MalK                                                                     | 493, 300                   |
| maltose / glucose PTS permease                                                | 51                         |
| maltose ABC transporter                                                       | 300                        |
| mannitol PTS permease - cryptic                                               | 419                        |
| mannose PTS permease                                                          | 429                        |
| MazE-MazF antitoxin/toxin complex and DNA-binding transcriptional repressor   | 91                         |
| McrBC restriction endonuclease                                                | 532                        |
| MdtABC-TolC multidrug efflux transport system                                 | 19                         |
| MdtEF-TolC multidrug efflux transport system                                  | 19                         |
| methylphosphonate degradation complex                                         | 52                         |
| molybdate ABC transporter                                                     | 372                        |
| molybdopterin synthase                                                        | 196                        |
| MqsA-MqsR antitoxin/toxin complex and DNA-binding transcriptional repressor   | 161                        |
| MukBEF complex                                                                | 251                        |
| MukEF complex                                                                 | 251                        |
| murein tripeptide ABC transporter OppBCDFMppA                                 | 445                        |
| MutHLS complex, methyl-directed mismatch repair                               | 528, 216                   |
| N-acetylmuramic acid PTS permease                                             | 51                         |
| NADH:ubiquinone oxidoreductase I                                              | 35                         |
| nickel ABC transporter                                                        | 3                          |
| nitrate reductase A                                                           | 92                         |
| nitrate reductase Z                                                           | 163                        |
| nitrite reductase                                                             | 590                        |
| NusB-NusE complex                                                             | 488, 36                    |
| outer membrane lipopolysaccharide transport and assembly complex              | 208                        |

Continued on next page

Table S2: **Protein complexes constituting from one kind of protein, and the detected PPI module(s) entailing their proteins (Continued from previous page)**

| <b>Protein Complex</b>                                                      | <b>Detected PPI Module</b> |
|-----------------------------------------------------------------------------|----------------------------|
| Outer Membrane Protein Assembly Complex                                     | 142                        |
| peptide ABC transporter OppABCDF                                            | 445, 434                   |
| peptide ABC transporter SapABCDF                                            | 299                        |
| peptide ABC transporter YejABEF                                             | 434                        |
| periplasmic nitrate reductase                                               | 34                         |
| phenylalanyl-tRNA synthetase                                                | 405, 291                   |
| phosphate ABC transporter                                                   | 307                        |
| phospholipid ABC transporter                                                | 239                        |
| phosphonate ABC transporter                                                 | 321                        |
| predicted carbon-phosphorous lyase complex                                  | 52                         |
| predicted xanthine dehydrogenase                                            | 596, 339                   |
| primosome                                                                   | 16, 215                    |
| PrIF-YhaV antitoxin-toxin complex                                           | 320                        |
| protoheme IX ABC transporter                                                | 60                         |
| PTS permease - unknown specificity                                          | 64                         |
| putative selenate reductase                                                 | 237                        |
| putrescine / spermidine ABC transporter                                     | 457                        |
| putrescine ABC transporter                                                  | 84                         |
| pyridine nucleotide transhydrogenase                                        | 281                        |
| pyruvate dehydrogenase                                                      | 78, 56                     |
| RcsAB DNA-binding transcriptional dual regulator                            | 12, 2                      |
| RcsB-BglJ DNA-binding transcriptional activator                             | 12                         |
| RecBCD                                                                      | 56                         |
| RecFOR complex                                                              | 162                        |
| RelB-RelE antitoxin/toxin complex and DNA-binding transcriptional repressor | 384                        |
| resolvasome                                                                 | 10                         |
| ribonucleoside diphosphate reductase 1                                      | 108                        |
| ribonucleoside-diphosphate reductase 2                                      | 108                        |
| ribose ABC transporter                                                      | 335                        |
| ring 1,2-phenylacetyl-CoA epoxidase                                         | 199                        |
| RNA polymerase sigma 19                                                     | 98, 50, 14, 123            |
| RNA polymerase sigma 24                                                     | 98, 50, 14                 |
| RNA polymerase sigma 28                                                     | 14, 98, 50                 |
| RNA polymerase sigma 32                                                     | 98, 50, 14, 4              |
| RNA polymerase sigma 38                                                     | 98, 50, 14                 |
| RNA polymerase sigma 54                                                     | 98, 50, 14, 511            |
| RNA polymerase sigma 70                                                     | 98, 50, 14, 105            |
| RNA polymerase, core enzyme                                                 | 98, 50, 14                 |
| RnlA-RnlB toxin-antitoxin complex                                           | 356                        |
| SdsRQP multidrug efflux system                                              | 341                        |
| Sec Translocation Complex                                                   | 7                          |
| SecD-SecE-YajC-YidC Secretion Complex                                       | 7                          |
| SecYEG translocase                                                          | 7                          |
| soluble NADH dehydrogenase fragment                                         | 35                         |
| spermidine efflux transporter                                               | 581                        |
| succinate dehydrogenase                                                     | 46                         |
| succinyl-CoA synthetase                                                     | 44                         |

Continued on next page

Table S2: Protein complexes constituting from one kind of protein, and the detected PPI module(s) entailing their proteins (Continued from previous page)

| Protein Complex                                                                             | Detected PPI Module |
|---------------------------------------------------------------------------------------------|---------------------|
| SufBC <sub>2</sub> D Fe-S cluster scaffold complex                                          | 379                 |
| sulfate / thiosulfate / selenate / selenite ABC transporter CysAUWSbp                       | 290                 |
| sulfate / thiosulfate / selenite / selenate ABC transporter CysAUWCysP                      | 290                 |
| sulfate adenylyltransferase                                                                 | 427                 |
| sulfite reductase                                                                           | 51                  |
| sulfur transfer protein complex                                                             | 412                 |
| tagatose-1,6-bisphosphate aldolase 1                                                        | 283                 |
| tagatose-1,6-bisphosphate aldolase 2                                                        | 3                   |
| TatABCE protein export complex                                                              | 57                  |
| taurine ABC transporter                                                                     | 459                 |
| The Colicin A Import System                                                                 | 27                  |
| The Tol-Pal Cell Envelope Complex                                                           | 27                  |
| thiamin ABC transporter                                                                     | 114                 |
| thiazole synthase                                                                           | 1                   |
| TonB energy transducing system                                                              | 273                 |
| topoisomerase IV                                                                            | 41, 355             |
| translocation and assembly module                                                           | 322                 |
| trehalose PTS permease                                                                      | 51                  |
| trimer complex of formate dehydrogenase-N $\alpha$ ;, $\beta$ ;, and $\gamma$ ;<br>subunits | 252                 |
| trimethylamine N-oxide reductase I                                                          | 463, 311            |
| trimethylamine N-oxide reductase III                                                        | 527, 588            |
| tryptophan synthase                                                                         | 118                 |
| undecaprenyl-phosphate- $\alpha$ ;-L-Ara4N flippase                                         | 293                 |
| UvrABC Nucleotide Excision Repair Complex                                                   | 344, 17, 480, 244   |
| vitamin B12 outer membrane transport complex                                                | 27, 273             |
| vitamin B12 transport system                                                                | 27                  |
| vitamin B <sub>12</sub> ABC transporter                                                     | 27                  |
| xanthine dehydrogenase                                                                      | 213                 |
| Xer site-specific recombination system                                                      | 494                 |
| xylose ABC transporter                                                                      | 220                 |
| YadG/YadH ABC transporter                                                                   | 11                  |
| YbbA/YbbP ABC transporter                                                                   | 573                 |
| YbhF/YbhR/YbhS ABC transporter                                                              | 350                 |
| YcjN/YcjO/YcjP ABC transporter                                                              | 470                 |
| YdcS/YdcT/YdcV/YdcU ABC transporter                                                         | 317                 |
| YddO/YddP/YddQ/YddR/YddS ABC transporter                                                    | 207                 |
| YefM-YoeB antitoxin/toxin complex and DNA-binding transcriptional repres-<br>sor            | 241                 |
| YehW/YehX/YehY/YehZ ABC transporter                                                         | 302                 |
| YhdW/YhdX/YhdY/YhdZ ABC transporter                                                         | 250                 |
| YnjC/YnjD ABC transporter                                                                   | 587                 |
| YphD/YphE/YphF ABC transporter                                                              | 367                 |
| Zn <sup>2+</sup> ABC transporter                                                            | 257                 |

Table S3: **Locus tag and gene id of detected protein interaction in Y2H data.** Locus tag and gene name of interacting proteins are listed in the first four columns. The existence of the interaction in other PPI networks is shown in the fifth column. The sixth and seventh column highlights whether the interacting proteins has been detected in a PPI module and whether one of the proteins is a central protein in a PPI module.

| Locus tag1 | Locus tag2 | Gene1 | Gene2 | Existing in other data sources | Id of a detected module | Central protein |
|------------|------------|-------|-------|--------------------------------|-------------------------|-----------------|
| b0004      | b0044      | thrC  | fixX  | No                             | -                       |                 |
| b0008      | b0071      | talB  | leuD  | Yes                            | 55                      |                 |
| b0029      | b3262      | ispH  | yhdJ  | No                             | 1                       |                 |
| b0030      | b3021      | rihC  | mqsA  | No                             | -                       |                 |
| b0032      | b2181      | carA  | yejG  | No                             | -                       |                 |
| b0033      | b0032      | carB  | carA  | Yes                            | -                       |                 |
| b0037      | b0037      | caiC  | caiC  | No                             | 158                     |                 |
| b0042      | b0041      | fixB  | fixA  | No                             | -                       |                 |
| b0042      | b2988      | fixB  | gss   | No                             | 102                     |                 |
| b0042      | b3910      | fixB  | yiiM  | No                             | 102                     |                 |
| b0048      | b0044      | folA  | fixX  | No                             | -                       | FolA            |
| b0048      | b1566      | folA  | flxA  | No                             | -                       | FolA            |
| b0048      | b1575      | folA  | dicB  | No                             | -                       | FolA            |
| b0048      | b0424      | folA  | yajL  | No                             | -                       | FolA            |
| b0048      | b1831      | folA  | proQ  | No                             | -                       | FolA            |
| b0048      | b3825      | folA  | pldB  | No                             | -                       | FolA            |
| b0049      | b2022      | apaH  | hisB  | Yes                            | 25                      |                 |
| b0052      | b0044      | pdxA  | fixX  | Yes                            | 331                     |                 |
| b0052      | b1593      | pdxA  | ynfK  | No                             | -                       |                 |
| b4659      | b3560      | yabP  | glyQ  | No                             | -                       |                 |
| b4659      | b4181      | yabP  | yjfl  | No                             | -                       |                 |
| b4659      | b4379      | yabP  | yjjW  | No                             | -                       |                 |
| b4659      | b2714      | yabP  | ascG  | No                             | -                       |                 |
| b0064      | b3128      | araC  | garD  | No                             | -                       |                 |
| b0071      | b0071      | leuD  | leuD  | Yes                            | 55                      |                 |
| b0071      | b0072      | leuD  | leuC  | Yes                            | 55                      |                 |
| b0077      | b0077      | ilvI  | ilvI  | Yes                            | 326                     |                 |
| b0077      | b3021      | ilvI  | mqsA  | No                             | -                       |                 |
| b0078      | b0077      | ilvH  | ilvI  | Yes                            | -                       |                 |
| b0080      | b4171      | cra   | miaA  | No                             | -                       |                 |
| b0085      | b4505      | murE  | insX  | No                             | -                       |                 |
| b0085      | b0328      | murE  | yahN  | No                             | -                       |                 |
| b0085      | b1366      | murE  | ydaY  | Yes                            | -                       |                 |
| b0085      | b2004      | murE  | cbeA  | No                             | -                       |                 |
| b0085      | b2980      | murE  | glcC  | No                             | -                       |                 |
| b0085      | b3488      | murE  | yhiJ  | No                             | -                       |                 |
| b0086      | b0086      | murF  | murF  | Yes                            | 334                     |                 |
| b0088      | b0088      | murD  | murD  | Yes                            | 185                     |                 |
| b0088      | b0095      | murD  | ftsZ  | No                             | -                       |                 |
| b0088      | b0096      | murD  | lpxC  | No                             | -                       |                 |
| b0090      | b2581      | murG  | yfiF  | Yes                            | -                       |                 |
| b0091      | b0084      | murC  | ftsI  | No                             | -                       |                 |

Continued on next page

Table S3: **Locus tag and gene id of detected protein interaction in Y2H data.** Locus tag and gene name of interacting proteins are listed in the first four columns. The existence of the interaction in other PPI networks is shown in the fifth column. The sixth and seventh column highlights whether the interacting proteins has been detected in a PPI module and whether one of the proteins is a central protein in a PPI module. (Continued from previous page)

| <b>Locus tag1</b> | <b>Locus tag2</b> | <b>Gene1</b> | <b>Gene2</b> | <b>Existing in other data sources</b> | <b>Id of a detected module</b> | <b>Central protein</b> |
|-------------------|-------------------|--------------|--------------|---------------------------------------|--------------------------------|------------------------|
| b0091             | b1351             | murC         | racC         | No                                    | -                              |                        |
| b0091             | b1566             | murC         | flxA         | No                                    | -                              |                        |
| b0092             | b2012             | ddlB         | yeeD         | No                                    | -                              |                        |
| b0093             | b0095             | ftsQ         | ftsZ         | No                                    | -                              |                        |
| b0093             | b1960             | ftsQ         | vsr          | No                                    | -                              |                        |
| b0093             | b3933             | ftsQ         | ftsN         | Yes                                   | 70                             |                        |
| b0093             | b1391             | ftsQ         | paaD         | No                                    | -                              |                        |
| b0094             | b3448             | ftsA         | yhhA         | Yes                                   | 253                            |                        |
| b0099             | b0099             | mutT         | mutT         | Yes                                   | 473                            |                        |
| b0104             | b0237             | guaC         | pepD         | Yes                                   | 77                             | PepD                   |
| b0111             | b3021             | ampE         | mqsA         | No                                    | -                              |                        |
| b0113             | b4367             | pdhR         | fhuF         | No                                    | -                              |                        |
| b0115             | b0116             | aceF         | lpd          | Yes                                   | 78                             |                        |
| b0121             | b3262             | speE         | yhdJ         | No                                    | -                              |                        |
| b0130             | b3773             | yadE         | ilvY         | No                                    | -                              |                        |
| b0133             | b2299             | panC         | yfcD         | Yes                                   | -                              |                        |
| b0145             | b1831             | dksA         | proQ         | No                                    | -                              |                        |
| b0154             | b2980             | hemL         | glcC         | No                                    | -                              |                        |
| b0154             | b3021             | hemL         | mqsA         | No                                    | -                              |                        |
| b0159             | b1916             | mtn          | sdiA         | No                                    | -                              |                        |
| b0166             | b1566             | dapD         | flxA         | No                                    | -                              | DapD                   |
| b0171             | b1566             | pyrH         | flxA         | No                                    | -                              |                        |
| b0172             | b0172             | frr          | frr          | Yes                                   | 11                             |                        |
| b0172             | b1324             | frr          | tpx          | No                                    | 11                             |                        |
| b0172             | b2597             | frr          | raiA         | No                                    | 11                             |                        |
| b0172             | b2957             | frr          | ansB         | No                                    | 11                             |                        |
| b0172             | b4045             | frr          | yjbJ         | No                                    | 11                             |                        |
| b0172             | b1108             | frr          | ycfP         | No                                    | 11                             |                        |
| b0182             | b1566             | lpxB         | flxA         | No                                    | -                              |                        |
| b0182             | b3021             | lpxB         | mqsA         | No                                    | -                              |                        |
| b0182             | b3946             | lpxB         | fsaB         | No                                    | -                              |                        |
| b0182             | b1105             | lpxB         | lpoB         | No                                    | -                              |                        |
| b0182             | b3554             | lpxB         | viaF         | No                                    | -                              |                        |
| b0182             | b3010             | lpxB         | yqhC         | No                                    | -                              |                        |
| b0184             | b0215             | dnaE         | dnaQ         | Yes                                   | 36                             | DnaE                   |
| b0185             | b0185             | accA         | accA         | Yes                                   | 2                              |                        |
| b0185             | b1126             | accA         | potA         | No                                    | -                              |                        |
| b0185             | b2316             | accA         | accD         | Yes                                   | -                              |                        |
| b0188             | b0188             | tilS         | tilS         | No                                    | 12                             |                        |
| b0188             | b1831             | tilS         | proQ         | No                                    | -                              |                        |
| b0200             | b1462             | gmhB         | yddH         | No                                    | -                              |                        |
| b0200             | b1717             | gmhB         | rpmI         | No                                    | -                              |                        |

Continued on next page

Table S3: **Locus tag and gene id of detected protein interaction in Y2H data.** Locus tag and gene name of interacting proteins are listed in the first four columns. The existence of the interaction in other PPI networks is shown in the fifth column. The sixth and seventh column highlights whether the interacting proteins has been detected in a PPI module and whether one of the proteins is a central protein in a PPI module. (Continued from previous page)

| <b>Locus tag1</b> | <b>Locus tag2</b> | <b>Gene1</b> | <b>Gene2</b> | <b>Existing in other data sources</b> | <b>Id of a detected module</b> | <b>Central protein</b> |
|-------------------|-------------------|--------------|--------------|---------------------------------------|--------------------------------|------------------------|
| b0200             | b2696             | gmhB         | csrA         | No                                    | -                              |                        |
| b0215             | b0215             | dnaQ         | dnaQ         | Yes                                   | 36                             |                        |
| b0226             | b0226             | dinJ         | dinJ         | Yes                                   | 347                            |                        |
| b0237             | b0237             | pepD         | pepD         | Yes                                   | 77                             | PepD                   |
| b0240             | b2741             | crl          | rpoS         | No                                    | -                              |                        |
| b0243             | b0146             | proA         | sfsA         | Yes                                   | 31                             | ProA, SfsA             |
| b0243             | b0243             | proA         | proA         | Yes                                   | 31                             | ProA                   |
| b0243             | b2422             | proA         | cysA         | Yes                                   | -                              | ProA                   |
| b0243             | b2125             | proA         | yehT         | Yes                                   | 31                             | ProA, YehT             |
| b0261             | b0044             | mmuM         | fixX         | No                                    | -                              |                        |
| b0261             | b0199             | mmuM         | metN         | No                                    | -                              | MetN                   |
| b0261             | b3043             | mmuM         | ygiL         | No                                    | -                              |                        |
| b0291             | b2584             | ecpC         | pka          | No                                    | -                              |                        |
| b0325             | b2012             | yahK         | yeeD         | No                                    | -                              |                        |
| b0337             | b0337             | codA         | codA         | Yes                                   | 229                            |                        |
| b0348             | b0044             | mhpB         | fixX         | No                                    | -                              |                        |
| b0348             | b0095             | mhpB         | ftsZ         | No                                    | -                              |                        |
| b0348             | b0172             | mhpB         | frr          | No                                    | -                              |                        |
| b0348             | b1156             | mhpB         | tfaE         | No                                    | -                              |                        |
| b0348             | b2713             | mhpB         | hydN         | No                                    | -                              |                        |
| b0348             | b4502             | mhpB         | yeiW         | No                                    | -                              |                        |
| b0348             | b4342             | mhpB         | yjiT         | No                                    | -                              |                        |
| b0351             | b0044             | mhpF         | fixX         | No                                    | -                              |                        |
| b0351             | b0199             | mhpF         | metN         | No                                    | -                              | MetN                   |
| b0351             | b4505             | mhpF         | insX         | No                                    | -                              |                        |
| b0351             | b1176             | mhpF         | minC         | No                                    | -                              |                        |
| b0351             | b2147             | mhpF         | preA         | No                                    | -                              |                        |
| b0351             | b2907             | mhpF         | ubiH         | No                                    | -                              |                        |
| b0351             | b2980             | mhpF         | glcC         | No                                    | -                              |                        |
| b0351             | b2997             | mhpF         | hybO         | No                                    | -                              |                        |
| b0351             | b0946             | mhpF         | zapC         | No                                    | -                              |                        |
| b0351             | b4502             | mhpF         | yeiW         | No                                    | -                              |                        |
| b0351             | b3262             | mhpF         | yhdJ         | No                                    | -                              |                        |
| b0351             | ∅                 | mhpF         | ∅            | No                                    | -                              |                        |
| b0351             | b4342             | mhpF         | yjiT         | No                                    | -                              |                        |
| b0352             | b1264             | mhpE         | trpE         | No                                    | -                              | TrpE                   |
| b0356             | b0356             | frmA         | frmA         | Yes                                   | 37                             |                        |
| b0381             | b0095             | ddlA         | ftsZ         | No                                    | -                              |                        |
| b0386             | b1831             | proC         | proQ         | No                                    | -                              |                        |
| b0387             | b0044             | yaiI         | fixX         | No                                    | -                              |                        |
| b0387             | b0618             | yaiI         | citC         | No                                    | -                              |                        |
| b0387             | b1176             | yaiI         | minC         | No                                    | -                              |                        |

Continued on next page



Table S3: **Locus tag and gene id of detected protein interaction in Y2H data.** Locus tag and gene name of interacting proteins are listed in the first four columns. The existence of the interaction in other PPI networks is shown in the fifth column. The sixth and seventh column highlights whether the interacting proteins has been detected in a PPI module and whether one of the proteins is a central protein in a PPI module. (Continued from previous page)

| <b>Locus tag1</b> | <b>Locus tag2</b> | <b>Gene1</b> | <b>Gene2</b> | <b>Existing in other data sources</b> | <b>Id of a detected module</b> | <b>Central protein</b> |
|-------------------|-------------------|--------------|--------------|---------------------------------------|--------------------------------|------------------------|
| b0387             | b1689             | yaiI         | ydiL         | No                                    | -                              |                        |
| b0387             | b4379             | yaiI         | yjjW         | No                                    | -                              |                        |
| b0389             | b0199             | yaiA         | metN         | No                                    | -                              | MetN, YaiA             |
| b0389             | b4505             | yaiA         | insX         | No                                    | -                              | YaiA                   |
| b0389             | b1156             | yaiA         | tfaE         | No                                    | -                              | YaiA                   |
| b0389             | b1176             | yaiA         | minC         | No                                    | -                              | YaiA                   |
| b0389             | b2980             | yaiA         | glcC         | No                                    | -                              | YaiA                   |
| b0391             | b0044             | yaiE         | fixX         | No                                    | -                              |                        |
| b0391             | b2440             | yaiE         | eutC         | No                                    | -                              |                        |
| b0391             | b3021             | yaiE         | mqsA         | No                                    | -                              |                        |
| b0391             | b3043             | yaiE         | ygiL         | No                                    | -                              |                        |
| b0391             | b4379             | yaiE         | yjjW         | No                                    | -                              |                        |
| b0391             | b4587             | yaiE         | insN         | No                                    | -                              |                        |
| b0391             | b1831             | yaiE         | proQ         | No                                    | -                              |                        |
| b0391             | b4502             | yaiE         | yeiW         | No                                    | -                              |                        |
| b0391             | b3871             | yaiE         | typA         | No                                    | -                              | TypA                   |
| b0399             | b0321             | phoB         | yahG         | No                                    | -                              |                        |
| b0408             | b1713             | secD         | pheT         | Yes                                   | -                              |                        |
| b0413             | b0413             | nrdR         | nrdR         | Yes                                   | 114                            |                        |
| b0414             | b0044             | ribD         | fixX         | No                                    | -                              | RibD                   |
| b0414             | b0414             | ribD         | ribD         | Yes                                   | 67                             | RibD                   |
| b0414             | b1566             | ribD         | flxA         | No                                    | -                              | RibD                   |
| b0414             | b1575             | ribD         | dicB         | No                                    | -                              | RibD                   |
| b0417             | b0223             | thiL         | yafJ         | No                                    | -                              |                        |
| b0417             | b0398             | thiL         | sbcD         | No                                    | -                              |                        |
| b0417             | b1566             | thiL         | flxA         | No                                    | -                              |                        |
| b0417             | b1575             | thiL         | dicB         | No                                    | -                              |                        |
| b0417             | b2012             | thiL         | yeeD         | No                                    | -                              |                        |
| b0417             | b3043             | thiL         | ygiL         | No                                    | -                              |                        |
| b0417             | b1361             | thiL         | ydaW         | No                                    | -                              |                        |
| b0421             | b0421             | ispA         | ispA         | Yes                                   | 49                             | IspA                   |
| b0421             | b1849             | ispA         | purT         | Yes                                   | 49                             | IspA                   |
| b0431             | b0600             | cyoB         | ybdL         | No                                    | -                              |                        |
| b0437             | b0437             | clpP         | clpP         | Yes                                   | 61                             | ClpP                   |
| b0438             | b0438             | clpX         | clpX         | Yes                                   | 25                             |                        |
| b0440             | b4367             | hupB         | fhuF         | No                                    | -                              |                        |
| b0456             | b3825             | ybaA         | pldb         | No                                    | -                              |                        |
| b0463             | b0463             | acrA         | acrA         | Yes                                   | 19                             |                        |
| b0464             | b0464             | acrR         | acrR         | No                                    | 136                            |                        |
| b0467             | b0560             | priC         | nohD         | No                                    | -                              |                        |
| b0467             | b0775             | priC         | bioB         | No                                    | -                              |                        |
| b0467             | b1394             | priC         | paaG         | No                                    | -                              |                        |

Continued on next page

Table S3: **Locus tag and gene id of detected protein interaction in Y2H data.** Locus tag and gene name of interacting proteins are listed in the first four columns. The existence of the interaction in other PPI networks is shown in the fifth column. The sixth and seventh column highlights whether the interacting proteins has been detected in a PPI module and whether one of the proteins is a central protein in a PPI module. (Continued from previous page)

| <b>Locus tag1</b> | <b>Locus tag2</b> | <b>Gene1</b> | <b>Gene2</b> | <b>Existing in other data sources</b> | <b>Id of a detected module</b> | <b>Central protein</b> |
|-------------------|-------------------|--------------|--------------|---------------------------------------|--------------------------------|------------------------|
| b0467             | b2980             | priC         | glcC         | No                                    | -                              |                        |
| b0467             | b3773             | priC         | ilvY         | No                                    | -                              |                        |
| b0467             | b4052             | priC         | dnaB         | Yes                                   | 16                             | DnaB                   |
| b0467             | b0644             | priC         | ybeQ         | No                                    | -                              |                        |
| b0467             | b1117             | priC         | lolD         | No                                    | -                              |                        |
| b0467             | b2714             | priC         | ascG         | No                                    | -                              |                        |
| b0467             | b3357             | priC         | crp          | No                                    | -                              |                        |
| b0470             | b0184             | dnaX         | dnaE         | Yes                                   | 36                             | DnaE                   |
| b0470             | b0470             | dnaX         | dnaX         | Yes                                   | 36                             |                        |
| b0470             | b4259             | dnaX         | holC         | Yes                                   | -                              | HolC                   |
| b0470             | b4372             | dnaX         | holD         | Yes                                   | -                              |                        |
| b0473             | b0473             | htpG         | htpG         | Yes                                   | 96                             | HtpG                   |
| b0473             | b0946             | htpG         | zapC         | Yes                                   | 96                             | HtpG                   |
| b0474             | b0600             | adk          | ybdL         | Yes                                   | -                              |                        |
| b0475             | b2440             | hemH         | eutC         | No                                    | -                              |                        |
| b0477             | b0477             | gsk          | gsk          | Yes                                   | 40                             |                        |
| b0490             | b0029             | ybbL         | ispH         | No                                    | 1                              |                        |
| b0490             | b0490             | ybbL         | ybbL         | Yes                                   | 1                              |                        |
| b0504             | b0516             | allS         | allC         | No                                    | -                              |                        |
| b0506             | b0037             | allR         | caiC         | No                                    | -                              |                        |
| b0506             | b0506             | allR         | allR         | Yes                                   | 284                            |                        |
| b0508             | b0044             | hyi          | fixX         | No                                    | -                              |                        |
| b0508             | b0199             | hyi          | metN         | No                                    | -                              | MetN                   |
| b0508             | b0719             | hyi          | ybgD         | No                                    | -                              |                        |
| b0508             | b2012             | hyi          | yeeD         | No                                    | -                              |                        |
| b0508             | b3043             | hyi          | ygiL         | No                                    | -                              |                        |
| b0509             | b0172             | glxR         | frr          | No                                    | -                              |                        |
| b0509             | b0199             | glxR         | metN         | No                                    | -                              | MetN                   |
| b0509             | b2012             | glxR         | yeeD         | No                                    | -                              |                        |
| b0509             | b3043             | glxR         | ygiL         | No                                    | -                              |                        |
| b0525             | b0700             | ppiB         | rhcC         | Yes                                   | 201                            |                        |
| b0551             | b4367             | quuD         | fhuF         | No                                    | -                              |                        |
| b0568             | b0568             | nfrA         | nfrA         | No                                    | 59                             |                        |
| b0586             | b0044             | entF         | fixX         | No                                    | -                              |                        |
| b0586             | b3936             | entF         | rpmE         | No                                    | -                              |                        |
| b0586             | b4342             | entF         | yjiT         | No                                    | -                              |                        |
| b0588             | b0311             | fepC         | betA         | No                                    | -                              |                        |
| b0588             | b0588             | fepC         | fepC         | Yes                                   | 218                            |                        |
| b0594             | b0199             | entE         | metN         | No                                    | -                              | MetN                   |
| b0594             | b0871             | entE         | poxB         | No                                    | -                              |                        |
| b0594             | b1462             | entE         | yddH         | No                                    | -                              |                        |
| b0594             | b1698             | entE         | ydiR         | No                                    | -                              |                        |

Continued on next page

Table S3: **Locus tag and gene id of detected protein interaction in Y2H data.** Locus tag and gene name of interacting proteins are listed in the first four columns. The existence of the interaction in other PPI networks is shown in the fifth column. The sixth and seventh column highlights whether the interacting proteins has been detected in a PPI module and whether one of the proteins is a central protein in a PPI module. (Continued from previous page)

| <b>Locus tag1</b> | <b>Locus tag2</b> | <b>Gene1</b> | <b>Gene2</b> | <b>Existing in other data sources</b> | <b>Id of a detected module</b> | <b>Central protein</b> |
|-------------------|-------------------|--------------|--------------|---------------------------------------|--------------------------------|------------------------|
| b0595             | b2173             | entB         | yeiR         | No                                    | -                              |                        |
| b0595             | b2980             | entB         | glcC         | No                                    | -                              |                        |
| b0595             | b0946             | entB         | zapC         | No                                    | -                              |                        |
| b0596             | b0172             | entA         | frr          | No                                    | -                              |                        |
| b0596             | b0199             | entA         | metN         | No                                    | -                              | MetN                   |
| b0596             | b2897             | entA         | cptB         | No                                    | -                              |                        |
| b0599             | b0044             | ybdH         | fixX         | No                                    | -                              |                        |
| b0599             | b0095             | ybdH         | ftsZ         | No                                    | -                              |                        |
| b0599             | b0172             | ybdH         | frr          | No                                    | -                              |                        |
| b0599             | b0599             | ybdH         | ybdH         | No                                    | 439                            |                        |
| b0599             | b1156             | ybdH         | tfaE         | No                                    | -                              |                        |
| b0599             | b2713             | ybdH         | hydN         | No                                    | -                              |                        |
| b0599             | b4502             | ybdH         | yeiW         | No                                    | -                              |                        |
| b0600             | b0044             | ybdL         | fixX         | No                                    | -                              |                        |
| b0600             | b0199             | ybdL         | metN         | No                                    | -                              | MetN                   |
| b0600             | b0600             | ybdL         | ybdL         | No                                    | 36                             |                        |
| b0600             | b2242             | ybdL         | glpB         | No                                    | -                              |                        |
| b0600             | b4502             | ybdL         | yeiW         | No                                    | -                              |                        |
| b0601             | b0464             | ybdM         | acrR         | No                                    | -                              |                        |
| b0601             | b0601             | ybdM         | ybdM         | No                                    | 14                             |                        |
| b0601             | b2713             | ybdM         | hydN         | No                                    | -                              |                        |
| b0601             | b2869             | ybdM         | ygeV         | No                                    | -                              |                        |
| b0601             | b0644             | ybdM         | ybeQ         | No                                    | 14                             |                        |
| b0601             | b0872             | ybdM         | hcr          | No                                    | -                              |                        |
| b0601             | b2714             | ybdM         | ascG         | No                                    | -                              |                        |
| b0602             | b0601             | ybdN         | ybdM         | No                                    | -                              |                        |
| b0603             | b3262             | ybdO         | yhdJ         | No                                    | -                              |                        |
| b0605             | b0172             | ahpC         | frr          | No                                    | -                              |                        |
| b0605             | b0605             | ahpC         | ahpC         | Yes                                   | 259                            |                        |
| b0605             | b1096             | ahpC         | pabC         | No                                    | -                              |                        |
| b0610             | b0199             | rnk          | metN         | No                                    | -                              | MetN                   |
| b0610             | b0601             | rnk          | ybdM         | No                                    | -                              |                        |
| b0610             | b0889             | rnk          | lrp          | No                                    | -                              |                        |
| b0610             | b2980             | rnk          | glcC         | No                                    | -                              |                        |
| b0610             | b3262             | rnk          | yhdJ         | No                                    | -                              |                        |
| b0614             | b4505             | citX         | insX         | No                                    | -                              |                        |
| b0614             | b2980             | citX         | glcC         | No                                    | 1                              |                        |
| b0614             | b3992             | citX         | thiF         | No                                    | 1                              |                        |
| b0616             | b4505             | citE         | insX         | No                                    | -                              |                        |
| b0616             | b0889             | citE         | lrp          | No                                    | -                              |                        |
| b0616             | b1176             | citE         | minC         | No                                    | -                              |                        |
| b0616             | b1394             | citE         | paaG         | No                                    | -                              |                        |

Continued on next page

Table S3: **Locus tag and gene id of detected protein interaction in Y2H data.** Locus tag and gene name of interacting proteins are listed in the first four columns. The existence of the interaction in other PPI networks is shown in the fifth column. The sixth and seventh column highlights whether the interacting proteins has been detected in a PPI module and whether one of the proteins is a central protein in a PPI module. (Continued from previous page)

| <b>Locus tag1</b> | <b>Locus tag2</b> | <b>Gene1</b> | <b>Gene2</b> | <b>Existing in other data sources</b> | <b>Id of a detected module</b> | <b>Central protein</b> |
|-------------------|-------------------|--------------|--------------|---------------------------------------|--------------------------------|------------------------|
| b0616             | b3021             | citE         | mqsA         | No                                    | -                              |                        |
| b0616             | b3773             | citE         | ilvY         | No                                    | -                              |                        |
| b0616             | b4367             | citE         | fhuF         | No                                    | -                              |                        |
| b0618             | b4505             | citC         | insX         | No                                    | -                              |                        |
| b0618             | b2907             | citC         | ubiH         | No                                    | -                              |                        |
| b0618             | b2997             | citC         | hybO         | No                                    | -                              |                        |
| b0620             | b4505             | dpiA         | insX         | No                                    | -                              |                        |
| b0620             | b1176             | dpiA         | minC         | No                                    | -                              |                        |
| b0620             | b1390             | dpiA         | paaC         | No                                    | -                              |                        |
| b0620             | b2440             | dpiA         | eutC         | No                                    | -                              |                        |
| b0620             | b2980             | dpiA         | glcC         | No                                    | -                              |                        |
| b0620             | b2997             | dpiA         | hybO         | No                                    | -                              |                        |
| b0620             | b4379             | dpiA         | yjjW         | No                                    | -                              |                        |
| b0620             | b1391             | dpiA         | paaD         | No                                    | -                              |                        |
| b0620             | b2769             | dpiA         | ygcQ         | No                                    | -                              |                        |
| b4581             | b1156             | ybeM         | tfaE         | No                                    | -                              |                        |
| b0628             | b0628             | lipA         | lipA         | Yes                                   | 10                             |                        |
| b0640             | b0044             | holA         | fixX         | No                                    | -                              |                        |
| b0640             | b0226             | holA         | dinJ         | No                                    | -                              |                        |
| b0640             | b4505             | holA         | insX         | No                                    | -                              |                        |
| b0640             | b0851             | holA         | nfsA         | No                                    | -                              |                        |
| b0640             | b0985             | holA         | gfcC         | No                                    | -                              |                        |
| b0640             | b1099             | holA         | holB         | Yes                                   | -                              |                        |
| b0640             | b1166             | holA         | ariR         | No                                    | -                              |                        |
| b0640             | b1176             | holA         | minC         | No                                    | -                              |                        |
| b0640             | b2006             | holA         | yeeW         | No                                    | -                              |                        |
| b0640             | b2285             | holA         | nuoE         | No                                    | -                              |                        |
| b0640             | b2562             | holA         | yfhL         | No                                    | -                              |                        |
| b0640             | b2980             | holA         | glcC         | No                                    | -                              |                        |
| b0640             | b3573             | holA         | ysaA         | No                                    | -                              |                        |
| b0640             | b3651             | holA         | trmH         | No                                    | -                              |                        |
| b0640             | b3890             | holA         | yiiF         | No                                    | -                              |                        |
| b0640             | b4084             | holA         | alsK         | No                                    | -                              |                        |
| b0657             | b1362             | lnt          | rzpR         | No                                    | -                              |                        |
| b0662             | b0662             | ubiF         | ubiF         | Yes                                   | 219                            |                        |
| b0674             | b0674             | asnB         | asnB         | Yes                                   | 36                             |                        |
| b0684             | b1499             | fldA         | ydeO         | No                                    | -                              |                        |
| b0684             | b2698             | fldA         | recX         | No                                    | -                              |                        |
| b0684             | b2830             | fldA         | rppH         | No                                    | -                              |                        |
| b0684             | b2980             | fldA         | glcC         | No                                    | -                              |                        |
| b0684             | b3185             | fldA         | rpmA         | No                                    | -                              |                        |
| b0684             | b3296             | fldA         | rpsD         | No                                    | -                              |                        |

Continued on next page

Table S3: **Locus tag and gene id of detected protein interaction in Y2H data.** Locus tag and gene name of interacting proteins are listed in the first four columns. The existence of the interaction in other PPI networks is shown in the fifth column. The sixth and seventh column highlights whether the interacting proteins has been detected in a PPI module and whether one of the proteins is a central protein in a PPI module. (Continued from previous page)

| <b>Locus tag1</b> | <b>Locus tag2</b> | <b>Gene1</b> | <b>Gene2</b> | <b>Existing in other data sources</b> | <b>Id of a detected module</b> | <b>Central protein</b> |
|-------------------|-------------------|--------------|--------------|---------------------------------------|--------------------------------|------------------------|
| b0684             | b3303             | fldA         | rpsE         | Yes                                   | -                              | RpsE                   |
| b0684             | b4118             | fldA         | melR         | No                                    | -                              |                        |
| b0684             | b1361             | fldA         | ydaW         | No                                    | -                              |                        |
| b0684             | b1831             | fldA         | proQ         | No                                    | -                              |                        |
| b0684             | b3825             | fldA         | pldB         | No                                    | -                              |                        |
| b0687             | b0687             | seqA         | seqA         | Yes                                   | 355                            |                        |
| b0687             | b0779             | seqA         | uvrB         | No                                    | -                              |                        |
| b0688             | b0688             | pgm          | pgm          | No                                    | 55                             |                        |
| b0700             | b0525             | rhcC         | ppiB         | Yes                                   | 201                            |                        |
| b0708             | b0708             | phr          | phr          | Yes                                   | 248                            |                        |
| b0709             | b2584             | dtpD         | pka          | No                                    | -                              |                        |
| b0719             | b4145             | ybgD         | yjeJ         | No                                    | -                              |                        |
| b0720             | b0720             | gltA         | gltA         | Yes                                   | 104                            | GltA                   |
| b0726             | b0726             | sucA         | sucA         | Yes                                   | 269                            |                        |
| b0727             | b0726             | sucB         | sucA         | Yes                                   | 269                            |                        |
| b0727             | b0727             | sucB         | sucB         | Yes                                   | 269                            |                        |
| b0738             | b1399             | tolR         | paaX         | No                                    | -                              |                        |
| b0741             | b1566             | pal          | flxA         | No                                    | -                              |                        |
| b0742             | b2980             | ybgF         | glcC         | No                                    | -                              |                        |
| b0742             | b3262             | ybgF         | yhdJ         | No                                    | -                              |                        |
| b0757             | b0044             | galK         | fixX         | No                                    | -                              |                        |
| b0757             | b0172             | galK         | frr          | No                                    | -                              |                        |
| b0757             | b1156             | galK         | tfaE         | No                                    | -                              |                        |
| b0757             | b3043             | galK         | ygiL         | No                                    | -                              |                        |
| b0759             | b0044             | galE         | fixX         | No                                    | -                              |                        |
| b0759             | b0172             | galE         | frr          | No                                    | -                              |                        |
| b0759             | b0530             | galE         | sfmA         | No                                    | -                              |                        |
| b0759             | b1156             | galE         | tfaE         | No                                    | -                              |                        |
| b0759             | b1674             | galE         | ydhY         | No                                    | -                              |                        |
| b0759             | b2713             | galE         | hydN         | No                                    | -                              |                        |
| b0759             | b2792             | galE         | yqcC         | No                                    | -                              |                        |
| b0759             | b3043             | galE         | ygiL         | No                                    | -                              |                        |
| b0759             | b3481             | galE         | nikR         | No                                    | -                              |                        |
| b0759             | b4379             | galE         | yjjW         | No                                    | -                              |                        |
| b0759             | b4502             | galE         | yeiW         | No                                    | -                              |                        |
| b0759             | b4342             | galE         | yjiT         | No                                    | -                              |                        |
| b0761             | b4379             | modE         | yjjW         | No                                    | -                              |                        |
| b0765             | b4471             | modC         | tdcG         | No                                    | -                              |                        |
| b0775             | b0223             | bioB         | yafJ         | No                                    | -                              |                        |
| b0775             | b1264             | bioB         | trpE         | No                                    | -                              | TrpE                   |
| b0775             | b2440             | bioB         | eutC         | No                                    | -                              |                        |
| b0775             | b2755             | bioB         | ygbT         | No                                    | -                              |                        |

Continued on next page

Table S3: **Locus tag and gene id of detected protein interaction in Y2H data.** Locus tag and gene name of interacting proteins are listed in the first four columns. The existence of the interaction in other PPI networks is shown in the fifth column. The sixth and seventh column highlights whether the interacting proteins has been detected in a PPI module and whether one of the proteins is a central protein in a PPI module. (Continued from previous page)

| <b>Locus tag1</b> | <b>Locus tag2</b> | <b>Gene1</b> | <b>Gene2</b> | <b>Existing in other data sources</b> | <b>Id of a detected module</b> | <b>Central protein</b> |
|-------------------|-------------------|--------------|--------------|---------------------------------------|--------------------------------|------------------------|
| b0775             | b4016             | bioB         | aceK         | No                                    | -                              |                        |
| b0775             | b1831             | bioB         | proQ         | No                                    | -                              |                        |
| b0777             | b1585             | bioC         | ynfC         | No                                    | -                              |                        |
| b0779             | b4505             | uvrB         | insX         | No                                    | -                              |                        |
| b0779             | b0601             | uvrB         | ybdM         | No                                    | -                              |                        |
| b0779             | b0640             | uvrB         | holA         | No                                    | -                              |                        |
| b0779             | b0779             | uvrB         | uvrB         | Yes                                   | 244                            |                        |
| b0779             | b1705             | uvrB         | ydiE         | No                                    | -                              |                        |
| b0779             | b2243             | uvrB         | glpC         | No                                    | -                              |                        |
| b0779             | b2440             | uvrB         | eutC         | No                                    | -                              |                        |
| b0779             | b2980             | uvrB         | glcC         | No                                    | -                              |                        |
| b0779             | b4118             | uvrB         | melR         | No                                    | -                              |                        |
| b0779             | b0535             | uvrB         | fimZ         | No                                    | -                              |                        |
| b0780             | b0477             | ybhK         | gsk          | Yes                                   | 40                             | YbhK                   |
| b0784             | b0785             | moaD         | moaE         | Yes                                   | 196                            |                        |
| b0784             | b2149             | moaD         | mglA         | No                                    | -                              |                        |
| b0784             | b3021             | moaD         | mqsA         | No                                    | -                              |                        |
| b0784             | b4587             | moaD         | insN         | No                                    | -                              |                        |
| b0785             | b4505             | moaE         | insX         | No                                    | -                              |                        |
| b0785             | b0785             | moaE         | moaE         | Yes                                   | 196                            |                        |
| b0785             | b1183             | moaE         | umuD         | No                                    | -                              |                        |
| b0785             | b1705             | moaE         | ydiE         | No                                    | -                              |                        |
| b0785             | b1895             | moaE         | uspC         | No                                    | -                              |                        |
| b0785             | b2440             | moaE         | eutC         | No                                    | -                              |                        |
| b0785             | b2980             | moaE         | glcC         | No                                    | -                              |                        |
| b0785             | b3481             | moaE         | nikR         | No                                    | -                              |                        |
| b0785             | b0872             | moaE         | hcr          | No                                    | -                              |                        |
| b0796             | b0796             | ybiH         | ybiH         | No                                    | 31                             |                        |
| b0796             | b2907             | ybiH         | ubiH         | No                                    | -                              |                        |
| b0801             | b0801             | ybiC         | ybiC         | No                                    | 141                            |                        |
| b0809             | b0809             | glnQ         | glnQ         | Yes                                   | 270                            |                        |
| b0819             | b2107             | ybiS         | rcnB         | Yes                                   | 169                            |                        |
| b0827             | b0827             | moeA         | moeA         | Yes                                   | 92                             |                        |
| b0838             | b0838             | gstB         | gstB         | No                                    | 25                             |                        |
| b0838             | b2022             | gstB         | hisB         | Yes                                   | 25                             |                        |
| b0848             | b2907             | ybjM         | ubiH         | No                                    | -                              |                        |
| b0848             | b2980             | ybjM         | glcC         | No                                    | -                              |                        |
| b0848             | b1831             | ybjM         | proQ         | No                                    | -                              |                        |
| b0849             | b0199             | grxA         | metN         | No                                    | -                              | MetN                   |
| b0849             | b0601             | grxA         | ybdM         | No                                    | -                              |                        |
| b0849             | b1156             | grxA         | tfaE         | No                                    | -                              |                        |
| b0849             | b3481             | grxA         | nikR         | No                                    | -                              |                        |

Continued on next page

Table S3: **Locus tag and gene id of detected protein interaction in Y2H data.** Locus tag and gene name of interacting proteins are listed in the first four columns. The existence of the interaction in other PPI networks is shown in the fifth column. The sixth and seventh column highlights whether the interacting proteins has been detected in a PPI module and whether one of the proteins is a central protein in a PPI module. (Continued from previous page)

| Locus tag1 | Locus tag2 | Gene1 | Gene2 | Existing in other data sources | Id of a detected module | Central protein |
|------------|------------|-------|-------|--------------------------------|-------------------------|-----------------|
| b0853      | b0601      | ybjN  | ybdM  | No                             | -                       |                 |
| b0853      | b1577      | ybjN  | ydfE  | No                             | -                       |                 |
| b0853      | b1705      | ybjN  | ydiE  | No                             | -                       |                 |
| b0853      | b2440      | ybjN  | eutC  | No                             | -                       |                 |
| b0853      | b2646      | ybjN  | ypjF  | No                             | -                       |                 |
| b0853      | b3651      | ybjN  | trmH  | No                             | -                       |                 |
| b0853      | b4587      | ybjN  | insN  | No                             | -                       |                 |
| b0856      | b0855      | potH  | potG  | Yes                            | 84                      |                 |
| b0861      | b0861      | artM  | artM  | Yes                            | 87                      |                 |
| b0864      | b0199      | artP  | metN  | No                             | -                       | MetN            |
| b0864      | b2273      | artP  | yfbN  | No                             | -                       | YfbN            |
| b0864      | b4153      | artP  | frdB  | No                             | -                       |                 |
| b0864      | b0946      | artP  | zapC  | No                             | -                       |                 |
| b0864      | b3357      | artP  | crp   | No                             | -                       |                 |
| b0873      | b0601      | hcp   | ybdM  | No                             | -                       |                 |
| b0873      | b0873      | hcp   | hcp   | No                             | 66                      |                 |
| b0873      | b2440      | hcp   | eutC  | No                             | -                       |                 |
| b0880      | b3541      | cspD  | dppD  | Yes                            | -                       |                 |
| b0882      | b0044      | clpA  | fixX  | No                             | -                       |                 |
| b0882      | b3021      | clpA  | mqsA  | No                             | -                       |                 |
| b0882      | b4587      | clpA  | insN  | No                             | -                       |                 |
| b0882      | b4502      | clpA  | yeiW  | No                             | -                       |                 |
| b0882      | []         | clpA  | []    | No                             | -                       |                 |
| b0884      | b1566      | infA  | flxA  | No                             | -                       |                 |
| b0884      | b3021      | infA  | mqsA  | No                             | -                       |                 |
| b0884      | b3010      | infA  | yqhC  | No                             | -                       |                 |
| b0885      | b0058      | aat   | rluA  | No                             | -                       |                 |
| b0885      | b2962      | aat   | yggX  | No                             | -                       |                 |
| b0888      | b0195      | trxB  | tsaA  | No                             | -                       |                 |
| b0888      | b0470      | trxB  | dnaX  | No                             | -                       |                 |
| b0888      | b1174      | trxB  | minE  | No                             | -                       |                 |
| b0888      | b1797      | trxB  | yeaR  | No                             | -                       |                 |
| b0888      | b2009      | trxB  | sbmC  | No                             | -                       |                 |
| b0888      | b2232      | trxB  | ubiG  | No                             | -                       |                 |
| b0888      | b4127      | trxB  | yjdJ  | No                             | -                       |                 |
| b0888      | b1831      | trxB  | proQ  | No                             | -                       |                 |
| b0889      | b0048      | lrp   | folA  | Yes                            | -                       | FolA            |
| b0893      | b0893      | serS  | serS  | Yes                            | 132                     | SerS            |
| b0902      | b1446      | pflA  | ydcY  | No                             | -                       |                 |
| b0910      | b1176      | cmk   | minC  | No                             | -                       |                 |
| b0910      | b1831      | cmk   | proQ  | No                             | -                       |                 |
| b0910      | b3825      | cmk   | pIdB  | No                             | -                       |                 |

Continued on next page

Table S3: **Locus tag and gene id of detected protein interaction in Y2H data.** Locus tag and gene name of interacting proteins are listed in the first four columns. The existence of the interaction in other PPI networks is shown in the fifth column. The sixth and seventh column highlights whether the interacting proteins has been detected in a PPI module and whether one of the proteins is a central protein in a PPI module. (Continued from previous page)

| <b>Locus tag1</b> | <b>Locus tag2</b> | <b>Gene1</b> | <b>Gene2</b> | <b>Existing in other data sources</b> | <b>Id of a detected module</b> | <b>Central protein</b> |
|-------------------|-------------------|--------------|--------------|---------------------------------------|--------------------------------|------------------------|
| b0918             | b4505             | kdsB         | insX         | No                                    | -                              | KdsB                   |
| b0918             | b1013             | kdsB         | rutR         | No                                    | -                              | KdsB                   |
| b0920             | b4505             | ycbC         | insX         | No                                    | -                              |                        |
| b0920             | b1156             | ycbC         | tfaE         | No                                    | -                              |                        |
| b0920             | b3732             | ycbC         | atpD         | No                                    | -                              |                        |
| b0923             | b2980             | mukE         | glcC         | No                                    | -                              |                        |
| b0923             | b3262             | mukE         | yhdJ         | No                                    | -                              |                        |
| b0927             | b3472             | ycbL         | dcrB         | No                                    | -                              |                        |
| b0928             | b0928             | aspC         | aspC         | Yes                                   | 32                             |                        |
| b0929             | b1489             | ompF         | dosP         | No                                    | -                              |                        |
| b0931             | b3430             | pncB         | glgC         | No                                    | -                              |                        |
| b0937             | b1372             | ssuE         | stfR         | No                                    | 111                            |                        |
| b0939             | b1787             | elfD         | yeaK         | No                                    | -                              |                        |
| b0954             | b1831             | fabA         | proQ         | No                                    | -                              |                        |
| b0956             | b0779             | matP         | uvrB         | No                                    | -                              |                        |
| b0956             | b2980             | matP         | glcC         | No                                    | -                              |                        |
| b0956             | b0644             | matP         | ybeQ         | No                                    | -                              |                        |
| b0956             | b1117             | matP         | lolD         | No                                    | -                              |                        |
| b0956             | b2714             | matP         | ascG         | No                                    | -                              |                        |
| b0956             | b3357             | matP         | crp          | No                                    | -                              |                        |
| b0959             | b1120             | sxy          | cobB         | Yes                                   | 126                            |                        |
| b0969             | b0189             | tusE         | rof          | No                                    | -                              |                        |
| b0969             | b0779             | tusE         | uvrB         | No                                    | -                              |                        |
| b0972             | b0977             | hyaA         | hyaF         | No                                    | -                              |                        |
| b0973             | b0975             | hyaB         | hyaD         | No                                    | -                              |                        |
| b0975             | b0972             | hyaD         | hyaA         | No                                    | -                              |                        |
| b0975             | b0973             | hyaD         | hyaB         | No                                    | -                              |                        |
| b0975             | b0975             | hyaD         | hyaD         | No                                    | 205                            |                        |
| b0975             | b2970             | hyaD         | yghF         | No                                    | 205                            |                        |
| b0985             | b2701             | gfcC         | mltB         | No                                    | 43                             |                        |
| b4517             | b0199             | gnsA         | metN         | No                                    | -                              | MetN                   |
| b4517             | b4517             | gnsA         | gnsA         | No                                    | 190                            |                        |
| b4517             | b4379             | gnsA         | yjjW         | No                                    | -                              |                        |
| b1013             | b2980             | rutR         | glcC         | No                                    | -                              |                        |
| b1015             | b1517             | putP         | lsrF         | No                                    | -                              |                        |
| b1015             | b2232             | putP         | ubiG         | No                                    | -                              |                        |
| b1015             | b3021             | putP         | mqsA         | No                                    | -                              |                        |
| b1021             | b0439             | pgaD         | lon          | No                                    | -                              |                        |
| b1021             | b1021             | pgaD         | pgaD         | No                                    | 316                            |                        |
| b1021             | b1290             | pgaD         | sapF         | No                                    | 316                            |                        |
| b1021             | b1961             | pgaD         | dcm          | No                                    | -                              |                        |
| b1021             | b3236             | pgaD         | mdh          | No                                    | -                              |                        |

Continued on next page



Table S3: **Locus tag and gene id of detected protein interaction in Y2H data.** Locus tag and gene name of interacting proteins are listed in the first four columns. The existence of the interaction in other PPI networks is shown in the fifth column. The sixth and seventh column highlights whether the interacting proteins has been detected in a PPI module and whether one of the proteins is a central protein in a PPI module. (Continued from previous page)

| <b>Locus tag1</b> | <b>Locus tag2</b> | <b>Gene1</b> | <b>Gene2</b> | <b>Existing in other data sources</b> | <b>Id of a detected module</b> | <b>Central protein</b> |
|-------------------|-------------------|--------------|--------------|---------------------------------------|--------------------------------|------------------------|
| b1021             | b3697             | pgaD         | yidA         | No                                    | -                              |                        |
| b1021             | b3706             | pgaD         | mnmE         | Yes                                   | 316                            |                        |
| b1040             | b1040             | csgD         | csgD         | No                                    | 41                             |                        |
| b1062             | b1088             | pyrC         | yceD         | No                                    | -                              |                        |
| b1062             | b2273             | pyrC         | yfbN         | No                                    | -                              | YfbN                   |
| b1062             | b3418             | pyrC         | malT         | No                                    | -                              |                        |
| b1062             | b3651             | pyrC         | trmH         | No                                    | -                              |                        |
| b1077             | b1952             | flgF         | dsrB         | No                                    | -                              |                        |
| b1082             | b1033             | flgK         | ghrA         | No                                    | -                              |                        |
| b1096             | b1096             | pabC         | pabC         | Yes                                   | 143                            |                        |
| b1103             | b1103             | hinT         | hinT         | Yes                                   | 576                            |                        |
| b1118             | b1104             | lolE         | ycfL         | No                                    | -                              |                        |
| b1118             | b1816             | lolE         | yoaE         | No                                    | -                              |                        |
| b1118             | b2167             | lolE         | fruA         | No                                    | -                              |                        |
| b1118             | b4461             | lolE         | yfjD         | No                                    | -                              |                        |
| b1118             | b3010             | lolE         | yqhC         | No                                    | -                              |                        |
| b1120             | b1120             | cobB         | cobB         | Yes                                   | 126                            |                        |
| b1127             | b1127             | pepT         | pepT         | Yes                                   | 506                            |                        |
| b1127             | b3021             | pepT         | mqsA         | No                                    | -                              |                        |
| b1134             | b0199             | nudJ         | metN         | No                                    | -                              | MetN                   |
| b1135             | b1593             | rluE         | ynfK         | No                                    | -                              |                        |
| b1158             | b0044             | pinE         | fixX         | No                                    | -                              |                        |
| b1175             | b1176             | minD         | minC         | Yes                                   | -                              |                        |
| b1175             | b1547             | minD         | stfQ         | No                                    | -                              |                        |
| b1175             | b2562             | minD         | yfhL         | No                                    | -                              |                        |
| b1175             | b0691             | minD         | ybfG         | No                                    | -                              |                        |
| b1176             | b4379             | minC         | yjjW         | No                                    | -                              |                        |
| b1179             | b4379             | ycgL         | yjjW         | No                                    | -                              |                        |
| b1192             | b4379             | ldcA         | yjjW         | No                                    | -                              |                        |
| b1194             | b3262             | ycgR         | yhdJ         | No                                    | 1                              |                        |
| b1205             | b3734             | yehH         | atpA         | No                                    | -                              |                        |
| b1224             | b1226             | narG         | narJ         | Yes                                   | -                              |                        |
| b1233             | b0413             | yehJ         | nrdR         | No                                    | -                              |                        |
| b1243             | b3813             | oppA         | uvrD         | No                                    | -                              |                        |
| b1247             | b1394             | oppF         | paaG         | No                                    | -                              |                        |
| b1248             | b1248             | yciU         | yciU         | Yes                                   | 80                             |                        |
| b1248             | b0296             | yciU         | ykgM         | No                                    | -                              |                        |
| b1258             | b1258             | yciF         | yciF         | Yes                                   | 120                            |                        |
| b1262             | b0044             | trpC         | fixX         | No                                    | -                              |                        |
| b1262             | b2232             | trpC         | ubiG         | No                                    | -                              |                        |
| b1262             | b3043             | trpC         | ygiL         | No                                    | -                              |                        |
| b1262             | b2846             | trpC         | yqeH         | No                                    | -                              |                        |

Continued on next page

Table S3: **Locus tag and gene id of detected protein interaction in Y2H data.** Locus tag and gene name of interacting proteins are listed in the first four columns. The existence of the interaction in other PPI networks is shown in the fifth column. The sixth and seventh column highlights whether the interacting proteins has been detected in a PPI module and whether one of the proteins is a central protein in a PPI module. (Continued from previous page)

| <b>Locus tag1</b> | <b>Locus tag2</b> | <b>Gene1</b> | <b>Gene2</b> | <b>Existing in other data sources</b> | <b>Id of a detected module</b> | <b>Central protein</b> |
|-------------------|-------------------|--------------|--------------|---------------------------------------|--------------------------------|------------------------|
| b1262             | b4342             | trpC         | yjiT         | No                                    | -                              |                        |
| b1275             | b1275             | cysB         | cysB         | Yes                                   | 219                            |                        |
| b1275             | b4109             | cysB         | yjdA         | No                                    | -                              |                        |
| b1276             | b0036             | acnA         | caiD         | No                                    | -                              |                        |
| b1284             | b1953             | yciT         | yodD         | No                                    | 26                             |                        |
| b1302             | b1846             | puuE         | yebE         | No                                    | -                              |                        |
| b1320             | b1320             | ycjW         | ycjW         | No                                    | 71                             |                        |
| b1324             | b1108             | tpx          | ycfP         | No                                    | 11                             |                        |
| b1330             | b0044             | ynaI         | fixX         | No                                    | -                              |                        |
| b1330             | b0530             | ynaI         | sfmA         | No                                    | -                              |                        |
| b1330             | b1105             | ynaI         | lpoB         | No                                    | -                              |                        |
| b1342             | b1342             | ydaN         | ydaN         | No                                    | 75                             |                        |
| b1360             | b1360             | ydaV         | ydaV         | No                                    | 592                            |                        |
| b1414             | b4502             | ydcF         | yeiW         | No                                    | -                              |                        |
| b1423             | b4505             | ydcJ         | insX         | No                                    | -                              |                        |
| b1423             | b3021             | ydcJ         | mqsA         | No                                    | -                              |                        |
| b1423             | b3479             | ydcJ         | nikD         | No                                    | -                              |                        |
| b1423             | b3806             | ydcJ         | cyaA         | No                                    | -                              |                        |
| b1423             | b4587             | ydcJ         | insN         | No                                    | -                              |                        |
| b1446             | b0044             | ydcY         | fixX         | No                                    | -                              |                        |
| b1446             | b0172             | ydcY         | frr          | No                                    | -                              |                        |
| b1446             | b0199             | ydcY         | metN         | No                                    | -                              | MetN                   |
| b1446             | b4505             | ydcY         | insX         | No                                    | -                              |                        |
| b1446             | b0902             | ydcY         | pflA         | No                                    | -                              |                        |
| b1446             | b3231             | ydcY         | rplM         | Yes                                   | 2                              | RplM                   |
| b1446             | b0872             | ydcY         | hcr          | No                                    | -                              |                        |
| b1446             | b1831             | ydcY         | proQ         | No                                    | -                              |                        |
| b1474             | b3891             | fdnG         | fdhE         | Yes                                   | -                              |                        |
| b1482             | b0172             | osmC         | frr          | No                                    | -                              | OsmC                   |
| b1482             | b1482             | osmC         | osmC         | No                                    | 25                             | OsmC                   |
| b1482             | b2418             | osmC         | pdxK         | No                                    | -                              | OsmC                   |
| b1486             | b3541             | ddpB         | dppD         | No                                    | -                              |                        |
| b1493             | b0199             | gadB         | metN         | No                                    | -                              | MetN                   |
| b1493             | b2107             | gadB         | rcnB         | No                                    | -                              |                        |
| b1494             | b0399             | pqqL         | phoB         | No                                    | -                              |                        |
| b1518             | b0172             | lsrG         | frr          | No                                    | -                              |                        |
| b1539             | b1539             | ydfG         | ydfG         | Yes                                   | 59                             | YdfG                   |
| b1566             | b0421             | flxA         | ispA         | Yes                                   | 49                             | IspA                   |
| b1566             | b1566             | flxA         | flxA         | No                                    | 49                             |                        |
| b1566             | b2460             | flxA         | eutQ         | No                                    | 49                             | EutQ                   |
| b1603             | b1603             | pntA         | pntA         | Yes                                   | 281                            |                        |
| b1607             | b2676             | ydgC         | nrdF         | No                                    | -                              |                        |

Continued on next page

Table S3: **Locus tag and gene id of detected protein interaction in Y2H data.** Locus tag and gene name of interacting proteins are listed in the first four columns. The existence of the interaction in other PPI networks is shown in the fifth column. The sixth and seventh column highlights whether the interacting proteins has been detected in a PPI module and whether one of the proteins is a central protein in a PPI module. (Continued from previous page)

| <b>Locus tag1</b> | <b>Locus tag2</b> | <b>Gene1</b> | <b>Gene2</b> | <b>Existing in other data sources</b> | <b>Id of a detected module</b> | <b>Central protein</b> |
|-------------------|-------------------|--------------|--------------|---------------------------------------|--------------------------------|------------------------|
| b1612             | b1612             | fumA         | fumA         | Yes                                   | 16                             |                        |
| b1618             | b0044             | uidR         | fixX         | No                                    | -                              |                        |
| b1618             | b1618             | uidR         | uidR         | No                                    | 232                            |                        |
| b1618             | b1794             | uidR         | yeaP         | No                                    | 232                            |                        |
| b1626             | b0903             | ydgK         | pflB         | No                                    | -                              |                        |
| b1631             | b1631             | rsxG         | rsxG         | No                                    | 483                            |                        |
| b1639             | b3400             | mliC         | hslR         | Yes                                   | 450                            |                        |
| b1641             | b0964             | slyB         | yccT         | No                                    | -                              |                        |
| b1645             | b4505             | ydhK         | insX         | No                                    | -                              |                        |
| b1651             | b0172             | gloA         | frr          | No                                    | -                              |                        |
| b1680             | b0199             | sufS         | metN         | No                                    | -                              | MetN                   |
| b1680             | b2755             | sufS         | ygbT         | No                                    | -                              |                        |
| b1680             | b3357             | sufS         | crp          | No                                    | -                              |                        |
| b1681             | b0199             | sufD         | metN         | No                                    | -                              | MetN                   |
| b1681             | b1682             | sufD         | sufC         | Yes                                   | 379                            |                        |
| b1682             | b1683             | sufC         | sufB         | Yes                                   | 379                            |                        |
| b1694             | b0199             | ydiF         | metN         | No                                    | -                              | MetN                   |
| b1703             | b1703             | ppsR         | ppsR         | Yes                                   | 234                            |                        |
| b1706             | b0044             | ydiU         | fixX         | No                                    | -                              |                        |
| b1706             | b2232             | ydiU         | ubiG         | No                                    | -                              |                        |
| b1706             | b3043             | ydiU         | ygiL         | No                                    | -                              |                        |
| b1706             | b2846             | ydiU         | yqeH         | No                                    | -                              |                        |
| b1706             | b4342             | ydiU         | yjiT         | No                                    | -                              |                        |
| b1712             | b0779             | ihfA         | uvrB         | No                                    | -                              |                        |
| b1713             | b1713             | pheT         | pheT         | Yes                                   | 291                            |                        |
| b1713             | b4081             | pheT         | mdtO         | No                                    | -                              |                        |
| b1719             | b1719             | thrS         | thrS         | Yes                                   | 103                            | ThrS                   |
| b1732             | b1732             | katE         | katE         | Yes                                   | 43                             |                        |
| b1732             | b1922             | katE         | fliA         | No                                    | -                              |                        |
| b1740             | b1566             | nadE         | flxA         | Yes                                   | -                              | NadE                   |
| b1740             | b1575             | nadE         | dicB         | No                                    | -                              | NadE                   |
| b1740             | b1740             | nadE         | nadE         | Yes                                   | 5                              | NadE                   |
| b1741             | b2980             | cho          | glcC         | No                                    | 1                              |                        |
| b1744             | b0464             | astE         | acrR         | No                                    | -                              |                        |
| b1744             | b2755             | astE         | ygbT         | No                                    | -                              |                        |
| b1744             | b3262             | astE         | yhdJ         | No                                    | 1                              |                        |
| b1744             | b4480             | astE         | hdfr         | No                                    | -                              |                        |
| b1748             | b2086             | astC         | yegS         | No                                    | 104                            |                        |
| b1776             | b1776             | ydjL         | ydjL         | No                                    | 395                            |                        |
| b1785             | b0946             | yeaI         | zapC         | No                                    | 96                             |                        |
| b1807             | b0464             | tsaB         | acrR         | No                                    | -                              |                        |
| b1807             | b1807             | tsaB         | tsaB         | Yes                                   | 133                            |                        |

Continued on next page

Table S3: **Locus tag and gene id of detected protein interaction in Y2H data.** Locus tag and gene name of interacting proteins are listed in the first four columns. The existence of the interaction in other PPI networks is shown in the fifth column. The sixth and seventh column highlights whether the interacting proteins has been detected in a PPI module and whether one of the proteins is a central protein in a PPI module. (Continued from previous page)

| <b>Locus tag1</b> | <b>Locus tag2</b> | <b>Gene1</b> | <b>Gene2</b> | <b>Existing in other data sources</b> | <b>Id of a detected module</b> | <b>Central protein</b> |
|-------------------|-------------------|--------------|--------------|---------------------------------------|--------------------------------|------------------------|
| b1817             | b1817             | manX         | manX         | Yes                                   | 429                            |                        |
| b1817             | b3794             | manX         | wecG         | No                                    | -                              |                        |
| b1823             | b1823             | cspC         | cspC         | Yes                                   | 8                              | CspC                   |
| b1842             | b0215             | holE         | dnaQ         | Yes                                   | -                              |                        |
| b1849             | b0421             | purT         | ispA         | Yes                                   | 49                             | IspA                   |
| b1849             | b1849             | purT         | purT         | No                                    | 49                             |                        |
| b1850             | b1850             | eda          | eda          | Yes                                   | 37                             |                        |
| b1854             | b0657             | pykA         | lnt          | Yes                                   | 436                            |                        |
| b1854             | b1621             | pykA         | malX         | Yes                                   | -                              |                        |
| b1854             | b1854             | pykA         | pykA         | Yes                                   | 436                            |                        |
| b1861             | b1861             | ruvA         | ruvA         | Yes                                   | 10                             |                        |
| b1864             | b0009             | yebC         | mog          | No                                    | -                              | YebC                   |
| b1864             | b2127             | yebC         | mlrA         | No                                    | -                              | YebC                   |
| b1864             | b3262             | yebC         | yhdJ         | No                                    | -                              | YebC                   |
| b1864             | b3825             | yebC         | pldB         | No                                    | -                              | YebC                   |
| b1868             | b0897             | yecE         | ycaC         | Yes                                   | 245                            |                        |
| b1868             | b1868             | yecE         | yecE         | No                                    | 245                            |                        |
| b1895             | b0640             | uspC         | holA         | No                                    | -                              |                        |
| b1900             | b0046             | araG         | kefF         | No                                    | -                              |                        |
| b1900             | b0197             | araG         | metQ         | Yes                                   | -                              |                        |
| b1900             | b0325             | araG         | yahK         | No                                    | -                              |                        |
| b1900             | b1900             | araG         | araG         | Yes                                   | 385                            |                        |
| b1902             | b0172             | ftnB         | frr          | No                                    | -                              |                        |
| b1902             | b3021             | ftnB         | mqsA         | No                                    | -                              |                        |
| b1902             | b3479             | ftnB         | nikD         | No                                    | -                              |                        |
| b1902             | b4587             | ftnB         | insN         | No                                    | -                              |                        |
| b1913             | b1913             | uvrC         | uvrC         | Yes                                   | 480                            |                        |
| b1926             | b0601             | fliT         | ybdM         | No                                    | -                              |                        |
| b1928             | b4505             | yedD         | insX         | No                                    | -                              |                        |
| b1928             | b0775             | yedD         | bioB         | No                                    | -                              |                        |
| b1928             | b4367             | yedD         | fhuF         | No                                    | -                              |                        |
| b1942             | b2980             | fliJ         | glcC         | No                                    | -                              |                        |
| b1943             | b0356             | fliK         | frmA         | No                                    | -                              |                        |
| b1943             | b2006             | fliK         | yeeW         | No                                    | -                              |                        |
| b1943             | b3408             | fliK         | feoA         | No                                    | -                              |                        |
| b1943             | b4137             | fliK         | cutA         | No                                    | -                              |                        |
| b1945             | b0044             | fliM         | fixX         | No                                    | -                              |                        |
| b1945             | b4505             | fliM         | insX         | No                                    | -                              |                        |
| b1960             | b2980             | vsr          | glcC         | No                                    | -                              |                        |
| b1962             | b0044             | yedJ         | fixX         | No                                    | -                              |                        |
| b1962             | b4505             | yedJ         | insX         | No                                    | -                              |                        |
| b1962             | b1831             | yedJ         | proQ         | No                                    | -                              |                        |

Continued on next page

Table S3: **Locus tag and gene id of detected protein interaction in Y2H data.** Locus tag and gene name of interacting proteins are listed in the first four columns. The existence of the interaction in other PPI networks is shown in the fifth column. The sixth and seventh column highlights whether the interacting proteins has been detected in a PPI module and whether one of the proteins is a central protein in a PPI module. (Continued from previous page)

| <b>Locus tag1</b> | <b>Locus tag2</b> | <b>Gene1</b> | <b>Gene2</b> | <b>Existing in other data sources</b> | <b>Id of a detected module</b> | <b>Central protein</b> |
|-------------------|-------------------|--------------|--------------|---------------------------------------|--------------------------------|------------------------|
| b1963             | b2462             | yedR         | eutS         | No                                    | -                              |                        |
| b1968             | b2755             | yedV         | ygbT         | No                                    | -                              |                        |
| b1970             | b2012             | hiuH         | yeeD         | No                                    | -                              |                        |
| b1973             | b2830             | zinT         | rppH         | No                                    | -                              |                        |
| b1973             | b3745             | zinT         | viaA         | No                                    | -                              |                        |
| b1976             | b0034             | mtfA         | caiF         | No                                    | -                              |                        |
| b1976             | b0245             | mtfA         | ykfI         | No                                    | -                              |                        |
| b1976             | b4023             | mtfA         | yjbD         | No                                    | -                              |                        |
| b1976             | b3084             | mtfA         | rlmG         | No                                    | -                              |                        |
| b1976             | b3745             | mtfA         | viaA         | No                                    | -                              |                        |
| b2004             | b0172             | cbeA         | frr          | No                                    | -                              |                        |
| b2004             | b2418             | cbeA         | pdxK         | No                                    | -                              |                        |
| b2006             | b0172             | yeeW         | frr          | No                                    | -                              |                        |
| b2006             | b1831             | yeeW         | proQ         | No                                    | -                              |                        |
| b2020             | b0127             | hisD         | yadG         | No                                    | -                              |                        |
| b2022             | b2022             | hisB         | hisB         | Yes                                   | 25                             |                        |
| b2025             | b0199             | hisF         | metN         | No                                    | -                              | MetN                   |
| b2025             | b0662             | hisF         | ubiF         | No                                    | -                              |                        |
| b2025             | b2562             | hisF         | yfhL         | No                                    | -                              |                        |
| b2025             | b4367             | hisF         | fhuF         | No                                    | -                              |                        |
| b2028             | b0779             | ugd          | uvrB         | No                                    | -                              |                        |
| b2029             | b2029             | gnd          | gnd          | Yes                                   | 24                             |                        |
| b2032             | b1108             | wbbK         | ycfP         | Yes                                   | 11                             | WbbK                   |
| b2041             | b0199             | rfbB         | metN         | No                                    | -                              | MetN                   |
| b2041             | b1014             | rfbB         | putA         | No                                    | 25                             |                        |
| b2041             | b2041             | rfbB         | rfbB         | Yes                                   | 25                             |                        |
| b2041             | b1252             | rfbB         | tonB         | No                                    | -                              |                        |
| b2057             | b1390             | wcaC         | paaC         | No                                    | -                              |                        |
| b2066             | b2066             | udk          | udk          | No                                    | 13                             |                        |
| b2066             | b2755             | udk          | ygbT         | No                                    | -                              |                        |
| b2073             | b0199             | yegL         | metN         | No                                    | -                              | MetN                   |
| b2073             | b0464             | yegL         | acrR         | No                                    | -                              |                        |
| b2073             | b3021             | yegL         | mqsA         | No                                    | -                              |                        |
| b2086             | b0720             | yegS         | gltA         | Yes                                   | 104                            | GltA                   |
| b2093             | b0172             | gatB         | frr          | No                                    | -                              |                        |
| b2095             | b0199             | gatZ         | metN         | No                                    | -                              | MetN                   |
| b2118             | b4505             | yehI         | insX         | No                                    | -                              |                        |
| b2118             | b3021             | yehI         | mqsA         | No                                    | -                              |                        |
| b2118             | b3170             | yehI         | rimP         | No                                    | -                              |                        |
| b2129             | b4016             | yehX         | aceK         | No                                    | -                              |                        |
| b2130             | b2130             | yehY         | yehY         | Yes                                   | 302                            |                        |
| b2143             | b2143             | cdd          | cdd          | Yes                                   | 159                            |                        |

Continued on next page

Table S3: **Locus tag and gene id of detected protein interaction in Y2H data.** Locus tag and gene name of interacting proteins are listed in the first four columns. The existence of the interaction in other PPI networks is shown in the fifth column. The sixth and seventh column highlights whether the interacting proteins has been detected in a PPI module and whether one of the proteins is a central protein in a PPI module. (Continued from previous page)

| <b>Locus tag1</b> | <b>Locus tag2</b> | <b>Gene1</b> | <b>Gene2</b> | <b>Existing in other data sources</b> | <b>Id of a detected module</b> | <b>Central protein</b> |
|-------------------|-------------------|--------------|--------------|---------------------------------------|--------------------------------|------------------------|
| b2150             | b3749             | mglB         | rbsA         | No                                    | -                              |                        |
| b2155             | b3734             | cirA         | atpA         | Yes                                   | 38                             |                        |
| b2166             | b4505             | psuK         | insX         | No                                    | -                              |                        |
| b2166             | b2980             | psuK         | glcC         | No                                    | -                              |                        |
| b2169             | b0559             | fruB         | ybcW         | No                                    | -                              |                        |
| b2169             | b2169             | fruB         | fruB         | Yes                                   | 563                            |                        |
| b2173             | b1472             | yeiR         | yddL         | No                                    | -                              |                        |
| b2173             | b1652             | yeiR         | rnt          | No                                    | -                              |                        |
| b2181             | b4145             | yeyG         | yjeJ         | No                                    | -                              |                        |
| b2193             | b0223             | narP         | yafJ         | No                                    | -                              |                        |
| b2193             | b1117             | narP         | lolD         | No                                    | -                              |                        |
| b2212             | b4505             | alkB         | insX         | No                                    | -                              |                        |
| b2212             | b3021             | alkB         | mqsA         | No                                    | -                              |                        |
| b2213             | b2456             | ada          | eutN         | No                                    | -                              |                        |
| b2213             | b4016             | ada          | aceK         | No                                    | -                              |                        |
| b2213             | b2496             | ada          | hda          | No                                    | -                              |                        |
| b2217             | b2216             | rscB         | rscD         | Yes                                   | 12                             | RcsB                   |
| b2217             | b2217             | rscB         | rscB         | Yes                                   | 12                             | RcsB                   |
| b2217             | b3021             | rscB         | mqsA         | No                                    | -                              | RcsB                   |
| b2232             | b4505             | ubiG         | insX         | No                                    | -                              |                        |
| b2232             | b2907             | ubiG         | ubiH         | No                                    | -                              |                        |
| b2232             | b2980             | ubiG         | glcC         | No                                    | -                              |                        |
| b2248             | b0467             | rhmR         | priC         | No                                    | -                              |                        |
| b2248             | b2248             | rhmR         | rhmR         | No                                    | -                              |                        |
| b2255             | b0044             | arnA         | fixX         | No                                    | -                              |                        |
| b2259             | b1952             | pmrD         | dsrB         | No                                    | -                              |                        |
| b2262             | b2262             | menB         | menB         | Yes                                   | 9                              |                        |
| b2268             | b2554             | rbn          | glrR         | No                                    | -                              |                        |
| b2272             | b0855             | yfbM         | potG         | No                                    | -                              |                        |
| b2273             | b3001             | yfbN         | gpr          | No                                    | -                              | YfbN                   |
| b2273             | b3017             | yfbN         | ftsP         | Yes                                   | -                              | YfbN                   |
| b2275             | b2980             | yfbP         | glcC         | No                                    | -                              |                        |
| b2283             | b2283             | nuoG         | nuoG         | Yes                                   | 35                             |                        |
| b2283             | b2285             | nuoG         | nuoE         | Yes                                   | 35                             |                        |
| b2283             | b3006             | nuoG         | exbB         | No                                    | -                              |                        |
| b2285             | b2283             | nuoE         | nuoG         | Yes                                   | 35                             |                        |
| b2285             | b2285             | nuoE         | nuoE         | Yes                                   | 35                             |                        |
| b2289             | b2878             | lrhA         | ygfK         | No                                    | -                              | YgfK                   |
| b2297             | b2293             | pta          | yfbT         | No                                    | -                              |                        |
| b2299             | b0133             | yfcD         | panC         | Yes                                   | -                              |                        |
| b2306             | b0413             | hisP         | nrdR         | No                                    | -                              |                        |
| b2306             | b0946             | hisP         | zapC         | No                                    | -                              |                        |

Continued on next page

Table S3: **Locus tag and gene id of detected protein interaction in Y2H data.** Locus tag and gene name of interacting proteins are listed in the first four columns. The existence of the interaction in other PPI networks is shown in the fifth column. The sixth and seventh column highlights whether the interacting proteins has been detected in a PPI module and whether one of the proteins is a central protein in a PPI module. (Continued from previous page)

| Locus tag1 | Locus tag2 | Gene1 | Gene2 | Existing in other data sources | Id of a detected module | Central protein |
|------------|------------|-------|-------|--------------------------------|-------------------------|-----------------|
| b2316      | b0185      | accD  | accA  | Yes                            | -                       |                 |
| b2316      | b0956      | accD  | matP  | No                             | -                       |                 |
| b2316      | b1176      | accD  | minC  | No                             | -                       |                 |
| b2316      | b1183      | accD  | umuD  | No                             | -                       |                 |
| b2316      | b1390      | accD  | paaC  | No                             | -                       |                 |
| b2316      | b1895      | accD  | uspC  | No                             | -                       |                 |
| b2316      | b2595      | accD  | bamD  | No                             | -                       |                 |
| b2316      | b4367      | accD  | fhuF  | No                             | -                       |                 |
| b2316      | b3262      | accD  | yhdJ  | No                             | -                       |                 |
| b2318      | b0044      | truA  | fixX  | No                             | -                       |                 |
| b2318      | b0172      | truA  | frr   | No                             | -                       |                 |
| b2318      | b2012      | truA  | yeeD  | No                             | -                       |                 |
| b2318      | b1831      | truA  | proQ  | No                             | -                       |                 |
| b2318      | b4342      | truA  | yjiT  | No                             | -                       |                 |
| b2322      | b0570      | yfcJ  | cusS  | No                             | -                       | CusS            |
| b2325      | b1703      | yfcL  | ppsR  | No                             | -                       |                 |
| b2331      | b1176      | smrB  | minC  | No                             | -                       |                 |
| b2331      | b1513      | smrB  | lsrA  | No                             | -                       |                 |
| b2331      | b1895      | smrB  | uspC  | No                             | -                       |                 |
| b2331      | b2980      | smrB  | glcC  | No                             | -                       |                 |
| b2331      | b3560      | smrB  | glyQ  | No                             | -                       |                 |
| b2331      | b3954      | smrB  | yijO  | No                             | -                       |                 |
| b2340      | b0453      | sixA  | ybaY  | No                             | -                       |                 |
| b2340      | b1973      | sixA  | zinT  | No                             | -                       |                 |
| b2340      | b2173      | sixA  | yeiR  | No                             | -                       |                 |
| b2340      | b2957      | sixA  | ansB  | No                             | -                       |                 |
| b2340      | b3021      | sixA  | mqsA  | No                             | -                       |                 |
| b2340      | b2107      | sixA  | rcnB  | No                             | -                       |                 |
| b2340      | b4501      | sixA  | torI  | No                             | -                       |                 |
| b2346      | b0185      | mlaA  | accA  | No                             | -                       |                 |
| b2346      | b1261      | mlaA  | trpB  | No                             | -                       |                 |
| b2346      | b4471      | mlaA  | tdcG  | No                             | -                       |                 |
| b2360      | b2532      | yfdQ  | trmJ  | No                             | -                       |                 |
| b2366      | b0199      | dsdA  | metN  | No                             | -                       | MetN            |
| b2369      | b0464      | evgA  | acrR  | No                             | -                       |                 |
| b2369      | b2012      | evgA  | yeeD  | No                             | -                       |                 |
| b2369      | b2263      | evgA  | menH  | No                             | -                       |                 |
| b2369      | b2731      | evgA  | fhlA  | No                             | -                       |                 |
| b2369      | b3868      | evgA  | glnG  | No                             | -                       |                 |
| b2369      | b4118      | evgA  | melR  | No                             | -                       |                 |
| b2369      | b0644      | evgA  | ybeQ  | No                             | -                       |                 |
| b2369      | b1831      | evgA  | proQ  | No                             | -                       |                 |

Continued on next page

Table S3: **Locus tag and gene id of detected protein interaction in Y2H data.** Locus tag and gene name of interacting proteins are listed in the first four columns. The existence of the interaction in other PPI networks is shown in the fifth column. The sixth and seventh column highlights whether the interacting proteins has been detected in a PPI module and whether one of the proteins is a central protein in a PPI module. (Continued from previous page)

| <b>Locus tag1</b> | <b>Locus tag2</b> | <b>Gene1</b> | <b>Gene2</b> | <b>Existing in other data sources</b> | <b>Id of a detected module</b> | <b>Central protein</b> |
|-------------------|-------------------|--------------|--------------|---------------------------------------|--------------------------------|------------------------|
| b2369             | b4342             | evgA         | yjiT         | No                                    | -                              |                        |
| b2373             | b2373             | oxc          | oxc          | Yes                                   | 289                            |                        |
| b2374             | b0199             | frc          | metN         | No                                    | -                              | MetN                   |
| b2374             | b0413             | frc          | nrdR         | No                                    | -                              |                        |
| b2379             | b0199             | alaC         | metN         | No                                    | -                              | MetN                   |
| b2379             | b2379             | alaC         | alaC         | No                                    | 499                            |                        |
| b2384             | b0199             | ypdE         | metN         | No                                    | -                              | MetN                   |
| b2384             | b1156             | ypdE         | tfaE         | No                                    | -                              |                        |
| b2384             | b2379             | ypdE         | alaC         | Yes                                   | -                              |                        |
| b2384             | b3481             | ypdE         | nikR         | No                                    | -                              |                        |
| b2409             | b0199             | yfeR         | metN         | No                                    | -                              | MetN                   |
| b2412             | b0095             | zipA         | ftsZ         | Yes                                   | -                              |                        |
| b2414             | b0199             | cysK         | metN         | No                                    | -                              | MetN                   |
| b2418             | b2123             | pdxK         | yehR         | No                                    | -                              |                        |
| b2418             | b2714             | pdxK         | ascG         | No                                    | -                              |                        |
| b2420             | b3021             | yfeS         | mqsA         | No                                    | -                              |                        |
| b2420             | b2107             | yfeS         | rcnB         | No                                    | -                              |                        |
| b2421             | b0530             | cysM         | sfmA         | No                                    | -                              |                        |
| b2421             | b0712             | cysM         | ybgK         | No                                    | -                              |                        |
| b2421             | b0719             | cysM         | ybgD         | No                                    | -                              |                        |
| b2421             | b0933             | cysM         | ssuB         | No                                    | -                              |                        |
| b2421             | b1247             | cysM         | oppF         | No                                    | -                              |                        |
| b2421             | b1973             | cysM         | zinT         | No                                    | -                              |                        |
| b2421             | b2012             | cysM         | yeeD         | No                                    | -                              |                        |
| b2421             | b2149             | cysM         | mglA         | No                                    | -                              |                        |
| b2421             | b2335             | cysM         | yfcR         | No                                    | -                              |                        |
| b2421             | b2713             | cysM         | hydN         | No                                    | -                              |                        |
| b2421             | b3215             | cysM         | yhcA         | No                                    | -                              |                        |
| b2421             | b1831             | cysM         | proQ         | No                                    | -                              |                        |
| b2438             | b4505             | eutK         | insX         | No                                    | -                              |                        |
| b2438             | b2149             | eutK         | mglA         | No                                    | -                              |                        |
| b2438             | b2273             | eutK         | yfbN         | No                                    | -                              | YfbN                   |
| b2440             | b2451             | eutC         | eutA         | No                                    | -                              |                        |
| b2451             | b0601             | eutA         | ybdM         | No                                    | -                              |                        |
| b2451             | b2440             | eutA         | eutC         | No                                    | -                              |                        |
| b2456             | b1176             | eutN         | minC         | No                                    | -                              |                        |
| b2456             | b1705             | eutN         | ydiE         | No                                    | -                              |                        |
| b2456             | b2143             | eutN         | cdd          | No                                    | -                              |                        |
| b2458             | b0601             | eutD         | ybdM         | No                                    | -                              | EutD                   |
| b2460             | b2458             | eutQ         | eutD         | No                                    | -                              | EutQ, EutD             |
| b2460             | b2460             | eutQ         | eutQ         | No                                    | 49                             | EutQ                   |
| b2460             | b2868             | eutQ         | xdhC         | No                                    | -                              | EutQ                   |

Continued on next page



Table S3: **Locus tag and gene id of detected protein interaction in Y2H data.** Locus tag and gene name of interacting proteins are listed in the first four columns. The existence of the interaction in other PPI networks is shown in the fifth column. The sixth and seventh column highlights whether the interacting proteins has been detected in a PPI module and whether one of the proteins is a central protein in a PPI module. (Continued from previous page)

| <b>Locus tag1</b> | <b>Locus tag2</b> | <b>Gene1</b> | <b>Gene2</b> | <b>Existing in other data sources</b> | <b>Id of a detected module</b> | <b>Central protein</b> |
|-------------------|-------------------|--------------|--------------|---------------------------------------|--------------------------------|------------------------|
| b2471             | b0172             | yffB         | frr          | No                                    | -                              |                        |
| b2471             | b0199             | yffB         | metN         | No                                    | -                              | MetN                   |
| b2471             | b0902             | yffB         | pflA         | No                                    | -                              |                        |
| b2471             | b2440             | yffB         | eutC         | No                                    | -                              |                        |
| b2471             | b2471             | yffB         | yffB         | No                                    | 168                            |                        |
| b2471             | b0872             | yffB         | hcr          | No                                    | -                              |                        |
| b2471             | b1831             | yffB         | proQ         | No                                    | -                              |                        |
| b2472             | b2012             | dapE         | yeeD         | No                                    | -                              |                        |
| b2472             | b2055             | dapE         | wcaE         | No                                    | -                              |                        |
| b2472             | b4237             | dapE         | nrdG         | No                                    | -                              |                        |
| b2479             | b0172             | gcvR         | frr          | No                                    | -                              |                        |
| b2479             | b2701             | gcvR         | mltB         | No                                    | -                              |                        |
| b2480             | b2456             | bcp          | eutN         | No                                    | -                              |                        |
| b2491             | b2149             | hyfR         | mglA         | No                                    | -                              |                        |
| b2491             | b3357             | hyfR         | crp          | No                                    | -                              |                        |
| b2495             | b1334             | yfgD         | fnr          | No                                    | -                              |                        |
| b2495             | b1973             | yfgD         | zinT         | No                                    | -                              |                        |
| b2495             | b3021             | yfgD         | mqsA         | No                                    | -                              |                        |
| b2495             | b3262             | yfgD         | yhdJ         | No                                    | -                              |                        |
| b2495             | b3357             | yfgD         | crp          | No                                    | -                              |                        |
| b2498             | b2498             | upp          | upp          | Yes                                   | 44                             |                        |
| b2499             | b0719             | purM         | ybgD         | No                                    | -                              |                        |
| b2501             | b0200             | ppk          | gmhB         | No                                    | -                              |                        |
| b2501             | b0223             | ppk          | yafJ         | No                                    | -                              |                        |
| b2501             | b1717             | ppk          | rpmI         | No                                    | -                              |                        |
| b2501             | b3239             | ppk          | yhcO         | No                                    | -                              |                        |
| b2501             | b3953             | ppk          | frwD         | No                                    | -                              |                        |
| b2501             | b0946             | ppk          | zapC         | No                                    | -                              |                        |
| b2502             | b0199             | ppx          | metN         | No                                    | -                              | MetN                   |
| b2502             | b2502             | ppx          | ppx          | Yes                                   | 178                            |                        |
| b2502             | b4299             | ppx          | yjhI         | No                                    | -                              |                        |
| b2509             | b1308             | xseA         | pspE         | No                                    | -                              |                        |
| b2513             | b0998             | yfgM         | torD         | No                                    | -                              |                        |
| b2517             | b0095             | rlmN         | ftsZ         | No                                    | -                              | RlmN                   |
| b2517             | b2517             | rlmN         | rlmN         | Yes                                   | 99                             | RlmN                   |
| b2518             | b0172             | ndk          | frr          | No                                    | -                              |                        |
| b2525             | b0172             | fdx          | frr          | No                                    | -                              |                        |
| b2525             | b1266             | fdx          | yciV         | No                                    | -                              |                        |
| b2525             | b1831             | fdx          | proQ         | No                                    | -                              |                        |
| b2529             | b0470             | iscU         | dnaX         | No                                    | -                              | IscU                   |
| b2529             | b2527             | iscU         | hscB         | Yes                                   | -                              | IscU                   |
| b2531             | b2531             | iscR         | iscR         | No                                    | 287                            |                        |

Continued on next page

Table S3: **Locus tag and gene id of detected protein interaction in Y2H data.** Locus tag and gene name of interacting proteins are listed in the first four columns. The existence of the interaction in other PPI networks is shown in the fifth column. The sixth and seventh column highlights whether the interacting proteins has been detected in a PPI module and whether one of the proteins is a central protein in a PPI module. (Continued from previous page)

| Locus tag1 | Locus tag2 | Gene1 | Gene2 | Existing in other data sources | Id of a detected module | Central protein |
|------------|------------|-------|-------|--------------------------------|-------------------------|-----------------|
| b2533      | b4379      | suhB  | yjjW  | No                             | -                       |                 |
| b2542      | b0044      | hcaD  | fixX  | No                             | -                       |                 |
| b2542      | b2713      | hcaD  | hydN  | No                             | -                       |                 |
| b2542      | b3043      | hcaD  | ygiL  | No                             | -                       |                 |
| b2542      | b3481      | hcaD  | nikR  | No                             | -                       |                 |
| b2542      | b4379      | hcaD  | yjjW  | No                             | -                       |                 |
| b2554      | b4379      | glrR  | yjjW  | No                             | -                       |                 |
| b2566      | b4505      | era   | insX  | No                             | -                       |                 |
| b2566      | b0956      | era   | matP  | No                             | -                       |                 |
| b2566      | b1013      | era   | rutR  | No                             | -                       |                 |
| b2566      | b2345      | era   | yfdF  | No                             | -                       |                 |
| b2566      | b3021      | era   | mqsA  | No                             | -                       |                 |
| b2566      | b2714      | era   | ascG  | No                             | -                       |                 |
| b2566      | b3262      | era   | yhdJ  | No                             | 1                       |                 |
| b2569      | b0313      | lepA  | betI  | No                             | -                       | LepA            |
| b2569      | b1342      | lepA  | ydaN  | Yes                            | 75                      | LepA            |
| b2569      | b4306      | lepA  | yjhP  | No                             | -                       | LepA            |
| b2572      | b2573      | rseA  | rpoE  | No                             | -                       |                 |
| b2573      | b4505      | rpoE  | insX  | No                             | -                       |                 |
| b2573      | b0956      | rpoE  | matP  | No                             | -                       |                 |
| b2573      | b1620      | rpoE  | malI  | No                             | -                       |                 |
| b2573      | b2572      | rpoE  | rseA  | No                             | -                       |                 |
| b2573      | b2980      | rpoE  | glcC  | No                             | -                       |                 |
| b2573      | b3021      | rpoE  | mqsA  | No                             | -                       |                 |
| b2573      | b3262      | rpoE  | yhdJ  | No                             | -                       |                 |
| b2580      | b0044      | ung   | fixX  | No                             | -                       |                 |
| b2580      | b1117      | ung   | lolD  | No                             | -                       |                 |
| b2592      | b2012      | clpB  | yeeD  | No                             | -                       | ClpB            |
| b2592      | b1585      | clpB  | ynfC  | No                             | -                       | ClpB            |
| b2597      | b0172      | raiA  | frr   | No                             | 11                      |                 |
| b2597      | b2597      | raiA  | raiA  | Yes                            | 11                      |                 |
| b2601      | b0044      | aroF  | fixX  | No                             | -                       |                 |
| b2601      | b3043      | aroF  | ygiL  | No                             | -                       |                 |
| b2607      | b2607      | trmD  | trmD  | Yes                            | 36                      |                 |
| b2617      | b0414      | bamE  | ribD  | No                             | -                       | RibD            |
| b2620      | b2620      | smpB  | smpB  | Yes                            | 498                     |                 |
| b2627      | b1717      | yfjK  | rpmI  | No                             | -                       |                 |
| b2627      | b3239      | yfjK  | yhcO  | No                             | -                       |                 |
| b2627      | b3742      | yfjK  | mioC  | No                             | -                       |                 |
| b2646      | b4181      | ypjF  | yjfl  | No                             | -                       |                 |
| b2660      | b3775      | lhgO  | ppiC  | Yes                            | 478                     |                 |
| b2662      | b2012      | gabT  | yeeD  | No                             | -                       | GabT            |

Continued on next page

Table S3: **Locus tag and gene id of detected protein interaction in Y2H data.** Locus tag and gene name of interacting proteins are listed in the first four columns. The existence of the interaction in other PPI networks is shown in the fifth column. The sixth and seventh column highlights whether the interacting proteins has been detected in a PPI module and whether one of the proteins is a central protein in a PPI module. (Continued from previous page)

| <b>Locus tag1</b> | <b>Locus tag2</b> | <b>Gene1</b> | <b>Gene2</b> | <b>Existing in other data sources</b> | <b>Id of a detected module</b> | <b>Central protein</b> |
|-------------------|-------------------|--------------|--------------|---------------------------------------|--------------------------------|------------------------|
| b2662             | b4306             | gabT         | yjhP         | No                                    | -                              | GabT                   |
| b2669             | b0964             | stpA         | yccT         | No                                    | -                              |                        |
| b2673             | b2676             | nrdH         | nrdF         | No                                    | -                              |                        |
| b2675             | b0779             | nrdE         | uvrB         | No                                    | -                              |                        |
| b2677             | b0874             | proV         | ybjE         | No                                    | -                              |                        |
| b2677             | b2677             | proV         | proV         | Yes                                   | 312                            |                        |
| b2685             | b2685             | emrA         | emrA         | Yes                                   | 19                             |                        |
| b2688             | b0199             | gshA         | metN         | No                                    | -                              | MetN                   |
| b2688             | b0262             | gshA         | afuC         | No                                    | -                              |                        |
| b2696             | b0466             | csrA         | ybaM         | No                                    | -                              |                        |
| b2701             | b2980             | mltB         | glcC         | No                                    | -                              |                        |
| b2701             | b3021             | mltB         | mqsA         | No                                    | -                              |                        |
| b2701             | b3357             | mltB         | crp          | No                                    | -                              |                        |
| b2713             | b0872             | hydN         | hcr          | No                                    | -                              |                        |
| b2728             | b2990             | hypC         | hybG         | Yes                                   | 155                            |                        |
| b2729             | b2990             | hypD         | hybG         | Yes                                   | 155                            |                        |
| b2730             | b4505             | hypE         | insX         | No                                    | -                              |                        |
| b2730             | b0909             | hypE         | ycaL         | No                                    | -                              |                        |
| b2730             | b1921             | hypE         | fliZ         | No                                    | -                              |                        |
| b2730             | b2721             | hypE         | hycE         | No                                    | -                              |                        |
| b2730             | b2730             | hypE         | hypE         | Yes                                   | 261                            |                        |
| b2730             | b4398             | hypE         | creB         | No                                    | -                              |                        |
| b2730             | b2712             | hypE         | hypF         | No                                    | -                              |                        |
| b2743             | b4181             | pcm          | yjfl         | No                                    | -                              |                        |
| b2745             | b1831             | truD         | proQ         | No                                    | -                              |                        |
| b2748             | b0083             | ftsB         | ftsL         | Yes                                   | 70                             |                        |
| b2748             | b0096             | ftsB         | lpxC         | No                                    | -                              |                        |
| b2755             | b1834             | ygbT         | yebT         | No                                    | -                              |                        |
| b2755             | b1968             | ygbT         | yedV         | No                                    | -                              |                        |
| b2755             | b2755             | ygbT         | ygbT         | No                                    | -                              |                        |
| b2764             | b2764             | cysJ         | cysJ         | Yes                                   | 51                             |                        |
| b2764             | b0947             | cysJ         | ycbX         | Yes                                   | 51                             |                        |
| b2786             | b0882             | barA         | clpA         | Yes                                   | -                              |                        |
| b2791             | b0835             | truC         | rimO         | No                                    | -                              |                        |
| b2795             | b4051             | ygdH         | qorA         | No                                    | -                              |                        |
| b2799             | b2799             | fucO         | fucO         | Yes                                   | 41                             |                        |
| b2799             | b3287             | fucO         | def          | No                                    | -                              |                        |
| b2803             | b2803             | fucK         | fucK         | No                                    | 201                            |                        |
| b2808             | b3357             | gcvA         | crp          | No                                    | -                              |                        |
| b2810             | b2810             | csdA         | csdA         | Yes                                   | 277                            |                        |
| b2819             | b4505             | recD         | insX         | No                                    | -                              |                        |
| b2819             | b4587             | recD         | insN         | No                                    | -                              |                        |

Continued on next page

Table S3: **Locus tag and gene id of detected protein interaction in Y2H data.** Locus tag and gene name of interacting proteins are listed in the first four columns. The existence of the interaction in other PPI networks is shown in the fifth column. The sixth and seventh column highlights whether the interacting proteins has been detected in a PPI module and whether one of the proteins is a central protein in a PPI module. (Continued from previous page)

| <b>Locus tag1</b> | <b>Locus tag2</b> | <b>Gene1</b> | <b>Gene2</b> | <b>Existing in other data sources</b> | <b>Id of a detected module</b> | <b>Central protein</b> |
|-------------------|-------------------|--------------|--------------|---------------------------------------|--------------------------------|------------------------|
| b2829             | b2582             | ptsP         | trxC         | No                                    | -                              |                        |
| b2829             | b2980             | ptsP         | glcC         | No                                    | 1                              |                        |
| b2829             | b3351             | ptsP         | kefG         | No                                    | -                              |                        |
| b2829             | b3781             | ptsP         | trxA         | No                                    | -                              |                        |
| b2833             | b3204             | ygdR         | ptsN         | No                                    | -                              |                        |
| b2838             | b4505             | lysA         | insX         | No                                    | -                              |                        |
| b2838             | b4124             | lysA         | dcuR         | No                                    | -                              |                        |
| b2839             | b4505             | lysR         | insX         | No                                    | -                              |                        |
| b2839             | b4367             | lysR         | fhuF         | No                                    | -                              |                        |
| b2839             | b3357             | lysR         | crp          | No                                    | -                              |                        |
| b2847             | b2980             | yqeI         | glcC         | No                                    | -                              |                        |
| b2852             | b2745             | ygeH         | truD         | No                                    | -                              |                        |
| b2869             | b2869             | ygeV         | ygeV         | Yes                                   | 33                             |                        |
| b2892             | b4505             | recJ         | insX         | No                                    | -                              |                        |
| b2892             | b2980             | recJ         | glcC         | No                                    | -                              |                        |
| b2894             | b2894             | xerD         | xerD         | Yes                                   | 494                            |                        |
| b2894             | b2980             | xerD         | glcC         | No                                    | -                              |                        |
| b2903             | b2904             | gcvP         | gcvH         | Yes                                   | 24                             | GcvP                   |
| b2904             | b1176             | gcvH         | minC         | No                                    | -                              |                        |
| b2906             | b2957             | visC         | ansB         | Yes                                   | 11                             |                        |
| b2918             | b0464             | argK         | acrR         | No                                    | -                              |                        |
| b2918             | b0601             | argK         | ybdM         | No                                    | -                              |                        |
| b2918             | b1176             | argK         | minC         | No                                    | -                              |                        |
| b2918             | b1394             | argK         | paaG         | No                                    | -                              |                        |
| b2918             | b4367             | argK         | fhuF         | No                                    | -                              |                        |
| b2918             | b0424             | argK         | yajL         | No                                    | -                              |                        |
| b2918             | b1593             | argK         | ynfK         | No                                    | -                              |                        |
| b2918             | b3262             | argK         | yhdJ         | No                                    | 1                              |                        |
| b2925             | b2925             | fbaA         | fbaA         | Yes                                   | 518                            |                        |
| b2926             | b1096             | pgk          | pabC         | No                                    | -                              |                        |
| b2938             | b2527             | speA         | hscB         | No                                    | -                              |                        |
| b2938             | b2713             | speA         | hydN         | No                                    | -                              |                        |
| b2938             | b2938             | speA         | speA         | Yes                                   | 246                            |                        |
| b2938             | b1560             | speA         | ydfU         | No                                    | -                              |                        |
| b2947             | b0946             | gshB         | zapC         | No                                    | -                              |                        |
| b2950             | b2950             | yggR         | yggR         | No                                    | 436                            |                        |
| b2951             | b0044             | yggS         | fixX         | No                                    | -                              |                        |
| b2952             | b2326             | yggT         | epmC         | No                                    | -                              |                        |
| b2952             | b3967             | yggT         | murI         | No                                    | 3                              |                        |
| b2955             | b0044             | yggW         | fixX         | No                                    | -                              |                        |
| b2955             | b2149             | yggW         | mglA         | No                                    | -                              |                        |
| b2955             | b2713             | yggW         | hydN         | No                                    | -                              |                        |

Continued on next page

Table S3: **Locus tag and gene id of detected protein interaction in Y2H data.** Locus tag and gene name of interacting proteins are listed in the first four columns. The existence of the interaction in other PPI networks is shown in the fifth column. The sixth and seventh column highlights whether the interacting proteins has been detected in a PPI module and whether one of the proteins is a central protein in a PPI module. (Continued from previous page)

| <b>Locus tag1</b> | <b>Locus tag2</b> | <b>Gene1</b> | <b>Gene2</b> | <b>Existing in other data sources</b> | <b>Id of a detected module</b> | <b>Central protein</b> |
|-------------------|-------------------|--------------|--------------|---------------------------------------|--------------------------------|------------------------|
| b2955             | b2997             | yggW         | hybO         | No                                    | -                              |                        |
| b2955             | b3357             | yggW         | crp          | No                                    | -                              |                        |
| b2959             | b1446             | yggL         | ydcY         | No                                    | -                              |                        |
| b2959             | b2760             | yggL         | casA         | No                                    | -                              |                        |
| b2979             | b0601             | glcD         | ybdM         | No                                    | -                              |                        |
| b2979             | b2440             | glcD         | eutC         | No                                    | -                              |                        |
| b2990             | b4505             | hybG         | insX         | No                                    | -                              |                        |
| b2990             | b0909             | hybG         | ycaL         | Yes                                   | 155                            |                        |
| b2990             | b2721             | hybG         | hycE         | Yes                                   | -                              |                        |
| b2990             | b2729             | hybG         | hypD         | Yes                                   | 155                            |                        |
| b2993             | b4375             | hybD         | prfC         | Yes                                   | 227                            |                        |
| b3005             | b3005             | exbD         | exbD         | Yes                                   | 273                            |                        |
| b3006             | b3006             | exbB         | exbB         | Yes                                   | 273                            |                        |
| b3017             | b3001             | ftsP         | gpr          | No                                    | -                              |                        |
| b3017             | b3017             | ftsP         | ftsP         | No                                    | 57                             |                        |
| b3021             | b0464             | mqsA         | acrR         | No                                    | -                              |                        |
| b3021             | b0956             | mqsA         | matP         | No                                    | -                              |                        |
| b3021             | b1334             | mqsA         | fnr          | No                                    | -                              |                        |
| b3021             | b1698             | mqsA         | ydiR         | No                                    | -                              |                        |
| b3021             | b1705             | mqsA         | ydiE         | No                                    | -                              |                        |
| b3021             | b1973             | mqsA         | zinT         | No                                    | -                              |                        |
| b3021             | b2755             | mqsA         | ygbT         | No                                    | -                              |                        |
| b3021             | b2980             | mqsA         | glcC         | No                                    | -                              |                        |
| b3021             | b3021             | mqsA         | mqsA         | Yes                                   | 161                            |                        |
| b3021             | b3185             | mqsA         | rpmA         | No                                    | -                              |                        |
| b3021             | b3262             | mqsA         | yhdJ         | No                                    | -                              |                        |
| b3021             | b3825             | mqsA         | pldB         | No                                    | -                              |                        |
| b3021             | b4342             | mqsA         | yjiT         | No                                    | -                              |                        |
| b3030             | b3030             | parE         | parE         | Yes                                   | 41                             | ParE                   |
| b3031             | b3608             | yqiA         | gpsA         | No                                    | -                              |                        |
| b3032             | b0044             | cpdA         | fixX         | No                                    | -                              |                        |
| b3041             | b3041             | ribB         | ribB         | Yes                                   | 289                            |                        |
| b3064             | b4505             | tsaD         | insX         | No                                    | -                              |                        |
| b3064             | b1807             | tsaD         | tsaB         | Yes                                   | 133                            |                        |
| b3064             | b3064             | tsaD         | tsaD         | Yes                                   | 133                            |                        |
| b3066             | b4505             | dnaG         | insX         | No                                    | -                              |                        |
| b3066             | b2440             | dnaG         | eutC         | No                                    | -                              |                        |
| b3067             | b0059             | rpoD         | rapA         | No                                    | -                              |                        |
| b3067             | b3067             | rpoD         | rpoD         | Yes                                   | 105                            |                        |
| b3067             | b3995             | rpoD         | rsd          | Yes                                   | -                              |                        |
| b3070             | b0640             | yqjH         | holA         | No                                    | -                              |                        |
| b3082             | b2646             | higA         | ypjF         | No                                    | -                              |                        |

Continued on next page

Table S3: **Locus tag and gene id of detected protein interaction in Y2H data.** Locus tag and gene name of interacting proteins are listed in the first four columns. The existence of the interaction in other PPI networks is shown in the fifth column. The sixth and seventh column highlights whether the interacting proteins has been detected in a PPI module and whether one of the proteins is a central protein in a PPI module. (Continued from previous page)

| Locus tag1 | Locus tag2 | Gene1 | Gene2 | Existing in other data sources | Id of a detected module | Central protein |
|------------|------------|-------|-------|--------------------------------|-------------------------|-----------------|
| b3082      | b3083      | higA  | higB  | No                             | -                       |                 |
| b3087      | b0239      | ygjR  | frsA  | No                             | -                       |                 |
| b3087      | b1183      | ygjR  | umuD  | No                             | -                       |                 |
| b3087      | b2755      | ygjR  | ygbT  | No                             | -                       |                 |
| b3087      | b3021      | ygjR  | mqsA  | No                             | -                       |                 |
| b3087      | b4016      | ygjR  | aceK  | No                             | -                       |                 |
| b3087      | b3848      | ygjR  | yigZ  | No                             | -                       |                 |
| b3102      | b0044      | yqjG  | fixX  | No                             | -                       | YqjG            |
| b3102      | b0662      | yqjG  | ubiF  | No                             | -                       | YqjG            |
| b3102      | b0775      | yqjG  | bioB  | No                             | -                       | YqjG            |
| b3105      | b3106      | yhaJ  | yhaK  | Yes                            | -                       |                 |
| b3105      | b3734      | yhaJ  | atpA  | No                             | -                       |                 |
| b3105      | b4502      | yhaJ  | yeiW  | No                             | -                       |                 |
| b3126      | b2012      | garL  | yeeD  | No                             | -                       |                 |
| b3137      | b1922      | kbaY  | fliA  | No                             | -                       |                 |
| b3157      | b0044      | yhbT  | fixX  | No                             | -                       |                 |
| b3160      | b1831      | yhbW  | proQ  | No                             | -                       |                 |
| b3183      | b3021      | obgE  | mqsA  | Yes                            | -                       |                 |
| b3187      | b3021      | ispB  | mqsA  | No                             | -                       |                 |
| b3189      | b2012      | murA  | yeeD  | No                             | -                       |                 |
| b3189      | b3043      | murA  | ygiL  | No                             | -                       |                 |
| b3204      | b2533      | ptsN  | suhB  | No                             | -                       |                 |
| b3204      | b2646      | ptsN  | ypjF  | No                             | -                       |                 |
| b3204      | b2980      | ptsN  | glcC  | No                             | -                       |                 |
| b3204      | b3262      | ptsN  | yhdJ  | No                             | -                       |                 |
| b3207      | b3488      | yrbL  | yhiJ  | No                             | -                       |                 |
| b3209      | b0044      | elbB  | fixX  | No                             | -                       |                 |
| b3209      | b2440      | elbB  | eutC  | No                             | -                       |                 |
| b3209      | b0296      | elbB  | ykgM  | No                             | -                       |                 |
| b3209      | b3262      | elbB  | yhdJ  | No                             | -                       |                 |
| b3211      | b2319      | yhcC  | usg   | No                             | -                       | YhcC            |
| b3214      | b2533      | gltF  | suhB  | No                             | -                       |                 |
| b3215      | b3357      | yhcA  | crp   | No                             | -                       |                 |
| b3219      | b2533      | yhcF  | suhB  | No                             | -                       |                 |
| b3219      | b2646      | yhcF  | ypjF  | No                             | -                       |                 |
| b3228      | b2646      | sspB  | ypjF  | No                             | -                       |                 |
| b3229      | b0731      | sspA  | mngA  | Yes                            | 340                     |                 |
| b3229      | b3229      | sspA  | sspA  | Yes                            | 340                     |                 |
| b3236      | b2460      | mdh   | eutQ  | No                             | -                       | EutQ            |
| b3248      | b3129      | yhdE  | prlF  | No                             | -                       |                 |
| b3256      | b2316      | accC  | accD  | Yes                            | -                       |                 |
| b3256      | b2421      | accC  | cysM  | Yes                            | -                       |                 |

Continued on next page

Table S3: **Locus tag and gene id of detected protein interaction in Y2H data.** Locus tag and gene name of interacting proteins are listed in the first four columns. The existence of the interaction in other PPI networks is shown in the fifth column. The sixth and seventh column highlights whether the interacting proteins has been detected in a PPI module and whether one of the proteins is a central protein in a PPI module. (Continued from previous page)

| <b>Locus tag1</b> | <b>Locus tag2</b> | <b>Gene1</b> | <b>Gene2</b> | <b>Existing in other data sources</b> | <b>Id of a detected module</b> | <b>Central protein</b> |
|-------------------|-------------------|--------------|--------------|---------------------------------------|--------------------------------|------------------------|
| b3256             | b3256             | accC         | accC         | Yes                                   | 65                             |                        |
| b3259             | b3264             | prmA         | envR         | No                                    | -                              | PrmA                   |
| b3264             | b1399             | envR         | paaX         | No                                    | -                              |                        |
| b3264             | b1541             | envR         | ydfZ         | No                                    | -                              | YdfZ                   |
| b3264             | b2533             | envR         | suhB         | No                                    | -                              |                        |
| b3264             | b3262             | envR         | yhdJ         | No                                    | -                              |                        |
| b3281             | b0564             | aroE         | appY         | No                                    | -                              |                        |
| b3281             | b3651             | aroE         | trmH         | No                                    | -                              |                        |
| b3281             | b3262             | aroE         | yhdJ         | No                                    | -                              |                        |
| b3284             | b1108             | smg          | ycfP         | No                                    | 11                             |                        |
| b3287             | b0662             | def          | ubiF         | No                                    | -                              |                        |
| b3287             | b2646             | def          | ypjF         | No                                    | -                              |                        |
| b3287             | b3651             | def          | trmH         | No                                    | -                              |                        |
| b3288             | b1831             | fnt          | proQ         | No                                    | -                              |                        |
| b3302             | b0775             | rpmD         | bioB         | No                                    | -                              |                        |
| b3302             | b2273             | rpmD         | yfbN         | No                                    | -                              | YfbN                   |
| b3304             | b0574             | rplR         | cusB         | No                                    | -                              |                        |
| b3304             | b3866             | rplR         | yihI         | No                                    | -                              |                        |
| b3306             | b3065             | rpsH         | rpsU         | Yes                                   | 17                             |                        |
| b3306             | b3186             | rpsH         | rplU         | No                                    | -                              | RplU                   |
| b3306             | b3253             | rpsH         | acuI         | No                                    | -                              |                        |
| b3306             | b3296             | rpsH         | rpsD         | Yes                                   | -                              |                        |
| b3306             | b3301             | rpsH         | rplO         | No                                    | -                              | RplO                   |
| b3306             | b3306             | rpsH         | rpsH         | Yes                                   | 17                             |                        |
| b3306             | b3316             | rpsH         | rpsS         | Yes                                   | 17                             |                        |
| b3306             | b3317             | rpsH         | rplB         | No                                    | -                              | RplB                   |
| b3306             | b3480             | rpsH         | nikE         | No                                    | -                              |                        |
| b3306             | b4202             | rpsH         | rpsR         | Yes                                   | 17                             |                        |
| b3306             | b1432             | rpsH         | insQ         | No                                    | -                              |                        |
| b3316             | b2608             | rpsS         | rimM         | No                                    | -                              |                        |
| b3329             | b1399             | gspH         | paaX         | No                                    | -                              |                        |
| b3329             | b2374             | gspH         | frc          | No                                    | -                              |                        |
| b3329             | b3005             | gspH         | exbD         | No                                    | -                              |                        |
| b3340             | b2473             | fusA         | ypfH         | Yes                                   | 5                              | FusA                   |
| b3352             | b0628             | yheS         | lipA         | No                                    | -                              |                        |
| b3352             | b3408             | yheS         | feoA         | No                                    | -                              |                        |
| b3361             | b0470             | fic          | dnaX         | No                                    | -                              |                        |
| b3361             | b2001             | fic          | yeeR         | Yes                                   | 329                            |                        |
| b3361             | b3361             | fic          | fic          | No                                    | 329                            |                        |
| b3361             | b3362             | fic          | yhfG         | Yes                                   | 329                            |                        |
| b3361             | b1046             | fic          | clsC         | No                                    | -                              |                        |
| b3365             | b3414             | nirB         | nfuA         | No                                    | -                              |                        |

Continued on next page

Table S3: **Locus tag and gene id of detected protein interaction in Y2H data.** Locus tag and gene name of interacting proteins are listed in the first four columns. The existence of the interaction in other PPI networks is shown in the fifth column. The sixth and seventh column highlights whether the interacting proteins has been detected in a PPI module and whether one of the proteins is a central protein in a PPI module. (Continued from previous page)

| <b>Locus tag1</b> | <b>Locus tag2</b> | <b>Gene1</b> | <b>Gene2</b> | <b>Existing in other data sources</b> | <b>Id of a detected module</b> | <b>Central protein</b> |
|-------------------|-------------------|--------------|--------------|---------------------------------------|--------------------------------|------------------------|
| b3374             | b1421             | frlD         | trg          | No                                    | -                              |                        |
| b3374             | b2975             | frlD         | glcA         | No                                    | 53                             |                        |
| b3374             | b3247             | frlD         | rng          | No                                    | -                              |                        |
| b3374             | b3374             | frlD         | frlD         | No                                    | 53                             |                        |
| b3374             | b3386             | frlD         | rpe          | Yes                                   | 53                             | Rpe                    |
| b3389             | b0044             | aroB         | fixX         | No                                    | -                              |                        |
| b3389             | b0719             | aroB         | ybgD         | No                                    | -                              |                        |
| b3389             | b2012             | aroB         | yeeD         | No                                    | -                              |                        |
| b3389             | b3043             | aroB         | ygiL         | No                                    | -                              |                        |
| b3389             | b3389             | aroB         | aroB         | No                                    | 5                              |                        |
| b3400             | b4505             | hslR         | insX         | No                                    | -                              |                        |
| b3400             | b0470             | hslR         | dnaX         | No                                    | -                              |                        |
| b3400             | b0601             | hslR         | ybdM         | No                                    | -                              |                        |
| b3400             | b0724             | hslR         | sdhB         | No                                    | -                              |                        |
| b3400             | b1176             | hslR         | minC         | No                                    | -                              |                        |
| b3400             | b2105             | hslR         | rcnR         | No                                    | -                              |                        |
| b3400             | b2173             | hslR         | yeiR         | No                                    | -                              |                        |
| b3400             | b2440             | hslR         | eutC         | No                                    | -                              |                        |
| b3400             | b2980             | hslR         | glcC         | No                                    | -                              |                        |
| b3400             | b3400             | hslR         | hslR         | Yes                                   | 450                            |                        |
| b3400             | b3418             | hslR         | malT         | No                                    | -                              |                        |
| b3400             | b1831             | hslR         | proQ         | No                                    | -                              |                        |
| b3400             | b3357             | hslR         | crp          | No                                    | -                              |                        |
| b3407             | b3407             | yhgF         | yhgF         | No                                    | 417                            |                        |
| b3409             | b3409             | feoB         | feoB         | No                                    | 165                            |                        |
| b3410             | b0975             | feoC         | hyaD         | No                                    | -                              |                        |
| b3410             | b4379             | feoC         | yjjW         | No                                    | -                              |                        |
| b3418             | b0601             | malT         | ybdM         | No                                    | -                              |                        |
| b3418             | b1394             | malT         | paaG         | No                                    | -                              |                        |
| b3418             | b2440             | malT         | eutC         | No                                    | -                              |                        |
| b3418             | b2699             | malT         | recA         | No                                    | -                              | RecA                   |
| b3418             | b3380             | malT         | yhfW         | No                                    | -                              |                        |
| b3418             | b3418             | malT         | malT         | Yes                                   | 493                            |                        |
| b3418             | b3357             | malT         | crp          | No                                    | -                              |                        |
| b3439             | b4342             | yhhW         | yjiT         | No                                    | -                              |                        |
| b3448             | b3448             | yhhA         | yhhA         | No                                    | 253                            |                        |
| b3449             | b1183             | ugpQ         | umuD         | No                                    | -                              |                        |
| b3449             | b2567             | ugpQ         | rnc          | No                                    | -                              |                        |
| b3449             | b3385             | ugpQ         | gph          | No                                    | -                              |                        |
| b3454             | b2608             | livF         | rimM         | No                                    | -                              |                        |
| b3454             | b3042             | livF         | yqiC         | No                                    | -                              |                        |
| b3480             | b3480             | nikE         | nikE         | Yes                                   | 3                              |                        |

Continued on next page



Table S3: **Locus tag and gene id of detected protein interaction in Y2H data.** Locus tag and gene name of interacting proteins are listed in the first four columns. The existence of the interaction in other PPI networks is shown in the fifth column. The sixth and seventh column highlights whether the interacting proteins has been detected in a PPI module and whether one of the proteins is a central protein in a PPI module. (Continued from previous page)

| Locus tag1 | Locus tag2 | Gene1 | Gene2 | Existing in other data sources | Id of a detected module | Central protein |
|------------|------------|-------|-------|--------------------------------|-------------------------|-----------------|
| b3481      | b0034      | nikR  | caiF  | No                             | -                       |                 |
| b3481      | b0044      | nikR  | fixX  | No                             | -                       |                 |
| b3481      | b2440      | nikR  | eutC  | No                             | -                       |                 |
| b3481      | b2667      | nikR  | ygaV  | No                             | -                       |                 |
| b3481      | b4367      | nikR  | fhuF  | No                             | -                       |                 |
| b3481      | b1831      | nikR  | proQ  | No                             | -                       |                 |
| b3481      | b4502      | nikR  | yeiW  | No                             | -                       |                 |
| b3495      | b1868      | uspA  | yecE  | No                             | 245                     |                 |
| b3495      | b3495      | uspA  | uspA  | Yes                            | 245                     |                 |
| b3498      | b1133      | prlC  | mnmA  | No                             | -                       |                 |
| b3501      | b0977      | arsR  | hyaF  | No                             | -                       |                 |
| b3507      | b0188      | dctR  | tilS  | No                             | 12                      |                 |
| b3540      | b2326      | dppF  | epmC  | No                             | -                       |                 |
| b3543      | b2130      | dppB  | yehY  | No                             | -                       |                 |
| b3549      | b0199      | tag   | metN  | No                             | -                       | MetN            |
| b3556      | b0797      | cspA  | rhIE  | No                             | -                       | RhIE            |
| b3556      | b1831      | cspA  | proQ  | No                             | -                       |                 |
| b3559      | b3560      | glyS  | glyQ  | Yes                            | -                       |                 |
| b3560      | b0060      | glyQ  | polB  | No                             | -                       |                 |
| b3560      | b0601      | glyQ  | ybdM  | No                             | -                       |                 |
| b3560      | b2997      | glyQ  | hybO  | No                             | -                       |                 |
| b3560      | b3559      | glyQ  | glyS  | Yes                            | -                       |                 |
| b3560      | b3262      | glyQ  | yhdJ  | No                             | -                       |                 |
| b3561      | b3561      | wecH  | wecH  | No                             | 370                     |                 |
| b3566      | b3986      | xylF  | rplL  | No                             | -                       | RplL            |
| b3567      | b4222      | xylG  | ytfP  | No                             | -                       |                 |
| b3568      | b0044      | xylH  | fixX  | No                             | -                       |                 |
| b3568      | b0530      | xylH  | sfmA  | No                             | -                       |                 |
| b3568      | b4398      | xylH  | creB  | No                             | -                       |                 |
| b3574      | b2980      | yiaJ  | glcC  | No                             | 1                       |                 |
| b3574      | b3262      | yiaJ  | yhdJ  | No                             | 1                       |                 |
| b3583      | b0034      | yiaS  | caiF  | No                             | -                       |                 |
| b3583      | b0044      | yiaS  | fixX  | No                             | -                       |                 |
| b3583      | b2149      | yiaS  | mglA  | No                             | -                       |                 |
| b3583      | b2713      | yiaS  | hydN  | No                             | -                       |                 |
| b3583      | b3185      | yiaS  | rpmA  | No                             | -                       |                 |
| b3583      | b3488      | yiaS  | yhiJ  | No                             | -                       |                 |
| b3583      | b3262      | yiaS  | yhdJ  | No                             | -                       |                 |
| b3583      | b4480      | yiaS  | hdfR  | No                             | -                       |                 |
| b3592      | b0044      | yibF  | fixX  | No                             | -                       |                 |
| b3594      | b2319      | yibA  | usg   | Yes                            | -                       | YibA            |
| b3594      | b3594      | yibA  | yibA  | Yes                            | 128                     | YibA            |

Continued on next page

Table S3: **Locus tag and gene id of detected protein interaction in Y2H data.** Locus tag and gene name of interacting proteins are listed in the first four columns. The existence of the interaction in other PPI networks is shown in the fifth column. The sixth and seventh column highlights whether the interacting proteins has been detected in a PPI module and whether one of the proteins is a central protein in a PPI module. (Continued from previous page)

| Locus tag1 | Locus tag2 | Gene1 | Gene2 | Existing in other data sources | Id of a detected module | Central protein |
|------------|------------|-------|-------|--------------------------------|-------------------------|-----------------|
| b3594      | b3357      | yibA  | crp   | No                             | -                       | YibA            |
| b3594      | b1597      | yibA  | asr   | Yes                            | 128                     | YibA            |
| b3601      | b2415      | mtlR  | ptsH  | No                             | -                       |                 |
| b3601      | b2646      | mtlR  | ypjF  | No                             | -                       |                 |
| b3601      | b3357      | mtlR  | crp   | No                             | -                       |                 |
| b3608      | b3608      | gpsA  | gpsA  | Yes                            | 176                     |                 |
| b3617      | b3617      | kbl   | kbl   | Yes                            | 32                      |                 |
| b3633      | b0719      | waaA  | ybgD  | No                             | -                       |                 |
| b3635      | b1881      | mutM  | cheZ  | No                             | -                       |                 |
| b3635      | b2285      | mutM  | nuoE  | No                             | -                       |                 |
| b3635      | b3129      | mutM  | prlF  | No                             | -                       |                 |
| b3635      | b4379      | mutM  | yjjW  | No                             | -                       |                 |
| b3635      | b2714      | mutM  | ascG  | No                             | -                       |                 |
| b3645      | b0245      | dinD  | ykfI  | No                             | -                       |                 |
| b3645      | b2522      | dinD  | sseB  | No                             | -                       |                 |
| b3651      | b3651      | trmH  | trmH  | Yes                            | 128                     |                 |
| b3661      | b3651      | nlpA  | trmH  | No                             | -                       |                 |
| b3669      | b3043      | uhpA  | ygiL  | No                             | -                       |                 |
| b3669      | b0946      | uhpA  | zapC  | No                             | -                       |                 |
| b3669      | b1831      | uhpA  | proQ  | No                             | -                       |                 |
| b3670      | b4379      | ilvN  | yjjW  | No                             | -                       |                 |
| b3670      | b2326      | ilvN  | epmC  | No                             | -                       |                 |
| b3671      | b3671      | ilvB  | ilvB  | Yes                            | 170                     |                 |
| b3674      | b3032      | yidF  | cpdA  | No                             | -                       |                 |
| b3680      | b0998      | yidL  | torD  | No                             | -                       |                 |
| b3686      | b3686      | ibpB  | ibpB  | Yes                            | 29                      |                 |
| b3700      | b1831      | recF  | proQ  | No                             | -                       |                 |
| b3701      | b0172      | dnaN  | frr   | No                             | -                       | DnaN            |
| b3701      | b0640      | dnaN  | holA  | Yes                            | -                       | DnaN            |
| b3701      | b2181      | dnaN  | yejG  | No                             | -                       | DnaN            |
| b3702      | b2361      | dnaA  | yfdR  | No                             | -                       |                 |
| b3704      | b0119      | rnpA  | yacL  | No                             | -                       |                 |
| b3706      | b2907      | mnmE  | ubiH  | No                             | -                       |                 |
| b3708      | b0477      | tnaA  | gsk   | No                             | -                       |                 |
| b3708      | b3708      | tnaA  | tnaA  | Yes                            | 364                     |                 |
| b3723      | b0464      | bglG  | acrR  | No                             | -                       | BglG            |
| b3723      | b0470      | bglG  | dnaX  | No                             | -                       | BglG            |
| b3723      | b2440      | bglG  | eutC  | No                             | -                       | BglG            |
| b3723      | b3723      | bglG  | bglG  | Yes                            | 157                     | BglG            |
| b3723      | b0946      | bglG  | zapC  | No                             | -                       | BglG            |
| b3730      | b3730      | glmU  | glmU  | Yes                            | 20                      |                 |
| b3731      | b3731      | atpC  | atpC  | Yes                            | 38                      |                 |

Continued on next page

Table S3: **Locus tag and gene id of detected protein interaction in Y2H data.** Locus tag and gene name of interacting proteins are listed in the first four columns. The existence of the interaction in other PPI networks is shown in the fifth column. The sixth and seventh column highlights whether the interacting proteins has been detected in a PPI module and whether one of the proteins is a central protein in a PPI module. (Continued from previous page)

| <b>Locus tag1</b> | <b>Locus tag2</b> | <b>Gene1</b> | <b>Gene2</b> | <b>Existing in other data sources</b> | <b>Id of a detected module</b> | <b>Central protein</b> |
|-------------------|-------------------|--------------|--------------|---------------------------------------|--------------------------------|------------------------|
| b3732             | b3731             | atpD         | atpC         | Yes                                   | 38                             |                        |
| b3732             | b3734             | atpD         | atpA         | Yes                                   | 38                             |                        |
| b3733             | b1399             | atpG         | paaX         | No                                    | -                              |                        |
| b3733             | b2646             | atpG         | ypjF         | No                                    | -                              |                        |
| b3733             | b2980             | atpG         | glcC         | No                                    | -                              |                        |
| b3733             | b3520             | atpG         | yhjB         | No                                    | -                              | YhjB                   |
| b3733             | b3731             | atpG         | atpC         | Yes                                   | 38                             |                        |
| b3733             | b4367             | atpG         | fhuF         | No                                    | -                              |                        |
| b3734             | b0172             | atpA         | frr          | No                                    | -                              |                        |
| b3734             | b1156             | atpA         | tfaE         | No                                    | -                              |                        |
| b3734             | b3484             | atpA         | yhhI         | No                                    | -                              |                        |
| b3734             | b3731             | atpA         | atpC         | Yes                                   | 38                             |                        |
| b3734             | b3732             | atpA         | atpD         | Yes                                   | 38                             |                        |
| b3734             | b0644             | atpA         | ybeQ         | No                                    | -                              |                        |
| b3734             | b4342             | atpA         | yjiT         | No                                    | -                              |                        |
| b3735             | b0286             | atpH         | paoA         | No                                    | -                              |                        |
| b3735             | b0470             | atpH         | dnaX         | No                                    | -                              |                        |
| b3735             | b1070             | atpH         | flgN         | No                                    | -                              |                        |
| b3735             | b1881             | atpH         | cheZ         | No                                    | -                              |                        |
| b3735             | b2105             | atpH         | rcnR         | No                                    | -                              |                        |
| b3735             | b2440             | atpH         | eutC         | No                                    | -                              |                        |
| b3740             | b2646             | rsmG         | ypjF         | No                                    | -                              |                        |
| b3742             | b2980             | mioC         | glcC         | No                                    | -                              |                        |
| b3744             | b3744             | asnA         | asnA         | Yes                                   | 44                             |                        |
| b3749             | b0172             | rbsA         | frr          | No                                    | -                              |                        |
| b3749             | b0809             | rbsA         | glnQ         | No                                    | -                              |                        |
| b3749             | b2755             | rbsA         | ygbT         | No                                    | -                              |                        |
| b3749             | b3021             | rbsA         | mqsA         | No                                    | -                              |                        |
| b3749             | b3749             | rbsA         | rbsA         | Yes                                   | 335                            |                        |
| b3749             | b3262             | rbsA         | yhdJ         | No                                    | -                              |                        |
| b3753             | b3021             | rbsR         | mqsA         | No                                    | -                              |                        |
| b3764             | b0215             | yifE         | dnaQ         | No                                    | -                              |                        |
| b3764             | b0464             | yifE         | acrR         | No                                    | -                              |                        |
| b3764             | b3043             | yifE         | ygiL         | No                                    | -                              |                        |
| b3764             | b3825             | yifE         | pldB         | No                                    | -                              |                        |
| b3774             | b0760             | ilvC         | modF         | No                                    | -                              |                        |
| b3775             | b3775             | ppiC         | ppiC         | Yes                                   | 478                            |                        |
| b3783             | b2988             | rho          | gss          | Yes                                   | 102                            |                        |
| b3783             | b3783             | rho          | rho          | Yes                                   | 102                            |                        |
| b3783             | b3910             | rho          | yiiM         | Yes                                   | 102                            |                        |
| b3806             | b0223             | cyaA         | yafJ         | No                                    | -                              |                        |
| b3806             | b0962             | cyaA         | helD         | No                                    | -                              |                        |

Continued on next page

Table S3: **Locus tag and gene id of detected protein interaction in Y2H data.** Locus tag and gene name of interacting proteins are listed in the first four columns. The existence of the interaction in other PPI networks is shown in the fifth column. The sixth and seventh column highlights whether the interacting proteins has been detected in a PPI module and whether one of the proteins is a central protein in a PPI module. (Continued from previous page)

| <b>Locus tag1</b> | <b>Locus tag2</b> | <b>Gene1</b> | <b>Gene2</b> | <b>Existing in other data sources</b> | <b>Id of a detected module</b> | <b>Central protein</b> |
|-------------------|-------------------|--------------|--------------|---------------------------------------|--------------------------------|------------------------|
| b3806             | b1264             | cyaA         | trpE         | No                                    | -                              | TrpE                   |
| b3806             | b3021             | cyaA         | mqsA         | No                                    | -                              |                        |
| b3806             | b3129             | cyaA         | prlF         | No                                    | -                              |                        |
| b3806             | b3773             | cyaA         | ilvY         | No                                    | -                              |                        |
| b3806             | b1198             | cyaA         | dhaM         | No                                    | -                              | DhaM                   |
| b3806             | b3262             | cyaA         | yhdJ         | No                                    | -                              |                        |
| b3806             | b3357             | cyaA         | crp          | No                                    | -                              |                        |
| b3810             | b3967             | yigA         | murI         | No                                    | -                              |                        |
| b3811             | b0064             | xerC         | araC         | No                                    | -                              |                        |
| b3811             | b0851             | xerC         | nfsA         | No                                    | -                              |                        |
| b3811             | b2980             | xerC         | glcC         | No                                    | -                              |                        |
| b3811             | b4379             | xerC         | yjjW         | No                                    | -                              |                        |
| b3811             | b1362             | xerC         | rzpR         | No                                    | -                              |                        |
| b3843             | b3492             | ubiD         | yhiN         | No                                    | 72                             |                        |
| b3867             | b4099             | hemN         | phnI         | Yes                                   | -                              |                        |
| b3867             | b0376             | hemN         | ampH         | No                                    | -                              |                        |
| b3869             | b1156             | glnL         | tfaE         | No                                    | -                              |                        |
| b3869             | b2980             | glnL         | glcC         | No                                    | -                              |                        |
| b3869             | b0535             | glnL         | fimZ         | No                                    | -                              |                        |
| b3870             | b2755             | glnA         | ygbT         | No                                    | -                              |                        |
| b3872             | b0724             | yihL         | sdhB         | No                                    | -                              |                        |
| b3872             | b1176             | yihL         | minC         | No                                    | -                              |                        |
| b3872             | b3021             | yihL         | mqsA         | No                                    | -                              |                        |
| b3872             | b4367             | yihL         | fhuF         | No                                    | -                              |                        |
| b3872             | b0855             | yihL         | potG         | No                                    | -                              |                        |
| b3877             | b2755             | yihP         | ygbT         | No                                    | -                              |                        |
| b3911             | b1399             | cpxA         | paaX         | No                                    | -                              |                        |
| b3912             | b3911             | cpxR         | cpxA         | Yes                                   | 315                            |                        |
| b3919             | b0903             | tpiA         | pflB         | Yes                                   | 140                            |                        |
| b3919             | b1127             | tpiA         | pepT         | Yes                                   | -                              |                        |
| b3921             | b3357             | yiiR         | crp          | No                                    | -                              |                        |
| b3923             | b1264             | uspD         | trpE         | No                                    | -                              | TrpE                   |
| b3923             | b3495             | uspD         | uspA         | Yes                                   | 245                            |                        |
| b3929             | b0470             | rraA         | dnaX         | No                                    | -                              |                        |
| b3929             | b0601             | rraA         | ybdM         | No                                    | -                              |                        |
| b3929             | b3357             | rraA         | crp          | No                                    | -                              |                        |
| b3933             | b1399             | ftsN         | paaX         | No                                    | -                              |                        |
| b3933             | b4379             | ftsN         | yjjW         | No                                    | -                              |                        |
| b3934             | b2456             | cytR         | eutN         | No                                    | -                              |                        |
| b3934             | b2667             | cytR         | ygaV         | No                                    | -                              |                        |
| b3934             | b2980             | cytR         | glcC         | No                                    | -                              |                        |
| b3934             | b3021             | cytR         | mqsA         | No                                    | -                              |                        |

Continued on next page

Table S3: **Locus tag and gene id of detected protein interaction in Y2H data.** Locus tag and gene name of interacting proteins are listed in the first four columns. The existence of the interaction in other PPI networks is shown in the fifth column. The sixth and seventh column highlights whether the interacting proteins has been detected in a PPI module and whether one of the proteins is a central protein in a PPI module. (Continued from previous page)

| Locus tag1 | Locus tag2 | Gene1 | Gene2 | Existing in other data sources | Id of a detected module | Central protein |
|------------|------------|-------|-------|--------------------------------|-------------------------|-----------------|
| b3936      | b0399      | rpmE  | phoB  | No                             | -                       |                 |
| b3936      | b0775      | rpmE  | bioB  | No                             | -                       |                 |
| b3936      | b1156      | rpmE  | tfaE  | No                             | -                       |                 |
| b3936      | b2456      | rpmE  | eutN  | No                             | -                       |                 |
| b3946      | b2184      | fsaB  | yehH  | No                             | -                       |                 |
| b3946      | b3513      | fsaB  | mdtE  | No                             | -                       |                 |
| b3950      | b2012      | frwB  | yeeD  | No                             | -                       |                 |
| b3950      | b2334      | frwB  | yfcQ  | No                             | -                       |                 |
| b3950      | b2980      | frwB  | glcC  | No                             | -                       |                 |
| b3954      | b0650      | yijO  | hscC  | No                             | -                       |                 |
| b3954      | b0779      | yijO  | uvrB  | No                             | -                       |                 |
| b3954      | b3953      | yijO  | frwD  | No                             | -                       |                 |
| b3958      | b0719      | argC  | ybgD  | No                             | -                       |                 |
| b3972      | b0044      | murB  | fixX  | No                             | -                       |                 |
| b3972      | b1831      | murB  | proQ  | No                             | -                       |                 |
| b3981      | b3067      | secE  | rpoD  | No                             | -                       |                 |
| b3983      | b1362      | rplK  | rzpR  | No                             | -                       |                 |
| b3987      | b0059      | rpoB  | rapA  | No                             | -                       | RpoB            |
| b4025      | b4025      | pgi   | pgi   | Yes                            | 52                      |                 |
| b4041      | b1620      | plsB  | mall  | No                             | -                       |                 |
| b4048      | b1105      | yjbM  | lpoB  | No                             | -                       |                 |
| b4063      | b4505      | soxR  | insX  | No                             | -                       |                 |
| b4063      | b0895      | soxR  | dmsB  | No                             | -                       |                 |
| b4076      | b2957      | nrfG  | ansB  | No                             | -                       |                 |
| b4079      | b0873      | fdhF  | hcp   | No                             | -                       |                 |
| b4081      | b1713      | mdtO  | pheT  | No                             | -                       |                 |
| b4081      | b4081      | mdtO  | mdtO  | No                             | -                       |                 |
| b4088      | b2440      | alsB  | eutC  | No                             | -                       |                 |
| b4088      | b1560      | alsB  | ydfU  | No                             | -                       |                 |
| b4101      | b3749      | phnG  | rbsA  | No                             | -                       |                 |
| b4141      | b1372      | yjeH  | stfR  | No                             | 111                     |                 |
| b4158      | b0199      | yjeO  | metN  | No                             | -                       | MetN            |
| b4158      | b3304      | yjeO  | rplR  | No                             | -                       |                 |
| b4158      | b0946      | yjeO  | zapC  | No                             | -                       |                 |
| b4167      | b4180      | nnr   | rlmB  | No                             | -                       |                 |
| b4170      | b4170      | mutL  | mutL  | Yes                            | 528                     |                 |
| b4173      | b2283      | hflX  | nuoG  | No                             | -                       |                 |
| b4181      | b4181      | yjfl  | yjfl  | No                             | 83                      |                 |
| b4191      | b2584      | ulaR  | pka   | Yes                            | -                       | UlaR            |
| b4202      | b4200      | rpsR  | rpsF  | Yes                            | -                       |                 |
| b4227      | b0463      | ytfQ  | acrA  | No                             | -                       |                 |
| b4227      | b0775      | ytfQ  | bioB  | No                             | -                       |                 |

Continued on next page

Table S3: **Locus tag and gene id of detected protein interaction in Y2H data.** Locus tag and gene name of interacting proteins are listed in the first four columns. The existence of the interaction in other PPI networks is shown in the fifth column. The sixth and seventh column highlights whether the interacting proteins has been detected in a PPI module and whether one of the proteins is a central protein in a PPI module. (Continued from previous page)

| <b>Locus tag1</b> | <b>Locus tag2</b> | <b>Gene1</b> | <b>Gene2</b> | <b>Existing in other data sources</b> | <b>Id of a detected module</b> | <b>Central protein</b> |
|-------------------|-------------------|--------------|--------------|---------------------------------------|--------------------------------|------------------------|
| b4227             | b1156             | ytfQ         | tfaE         | No                                    | -                              |                        |
| b4227             | b2456             | ytfQ         | eutN         | No                                    | -                              |                        |
| b4227             | b0644             | ytfQ         | ybeQ         | No                                    | -                              |                        |
| b4227             | b0872             | ytfQ         | hcr          | No                                    | -                              |                        |
| b4233             | b0095             | mpl          | ftsZ         | No                                    | -                              |                        |
| b4233             | b3106             | mpl          | yhaK         | No                                    | -                              |                        |
| b4233             | b4233             | mpl          | mpl          | No                                    | 134                            |                        |
| b4234             | b3825             | yjgA         | pldB         | No                                    | -                              |                        |
| b4237             | b4237             | nrdG         | nrdG         | Yes                                   | 169                            |                        |
| b4237             | b4238             | nrdG         | nrdD         | Yes                                   | 169                            | NrdD                   |
| b4238             | b0864             | nrdD         | artP         | No                                    | -                              | NrdD                   |
| b4238             | b3992             | nrdD         | thiF         | No                                    | -                              | NrdD                   |
| b4238             | b4238             | nrdD         | nrdD         | Yes                                   | 169                            | NrdD                   |
| b4239             | b0537             | treC         | intD         | No                                    | -                              |                        |
| b4241             | b2012             | treR         | yeeD         | No                                    | -                              |                        |
| b4241             | b2980             | treR         | glcC         | No                                    | -                              |                        |
| b4258             | b4258             | valS         | valS         | Yes                                   | 40                             |                        |
| b4259             | b4259             | holC         | holC         | Yes                                   | 62                             | HolC                   |
| b4266             | b1831             | idnO         | proQ         | No                                    | -                              |                        |
| b4266             | b2123             | idnO         | yehR         | No                                    | -                              |                        |
| b4268             | b0245             | idnK         | ykfl         | No                                    | -                              |                        |
| b4268             | b0601             | idnK         | ybdM         | No                                    | -                              |                        |
| b4268             | b2415             | idnK         | ptsH         | No                                    | -                              |                        |
| b4268             | b2440             | idnK         | eutC         | No                                    | -                              |                        |
| b4268             | b2646             | idnK         | ypjF         | No                                    | -                              |                        |
| b4268             | b3067             | idnK         | rpoD         | No                                    | -                              |                        |
| b4268             | b2714             | idnK         | ascG         | No                                    | -                              |                        |
| b4271             | b1127             | intB         | pepT         | No                                    | -                              |                        |
| b4290             | b0956             | fecB         | matP         | No                                    | -                              |                        |
| b4290             | b1501             | fecB         | ydeP         | No                                    | -                              |                        |
| b4290             | b1705             | fecB         | ydiE         | No                                    | -                              |                        |
| b4290             | b2805             | fecB         | fucR         | No                                    | -                              |                        |
| b4290             | b3721             | fecB         | bgIB         | No                                    | -                              |                        |
| b4290             | b1550             | fecB         | gnsB         | No                                    | -                              |                        |
| b4290             | b2123             | fecB         | yehR         | No                                    | -                              |                        |
| b4301             | b0088             | sgcE         | murD         | Yes                                   | 185                            |                        |
| b4361             | b4052             | dnaC         | dnaB         | Yes                                   | 16                             | DnaB                   |
| b4376             | b3472             | osmY         | dcrB         | No                                    | 104                            |                        |
| b4377             | b4377             | yjjU         | yjjU         | No                                    | 641                            |                        |
| b4383             | b1831             | deoB         | proQ         | No                                    | -                              |                        |
| b4389             | b0610             | radA         | rnk          | No                                    | -                              |                        |
| b4391             | b2980             | yjjK         | glcC         | No                                    | -                              |                        |

Continued on next page

Table S3: **Locus tag and gene id of detected protein interaction in Y2H data.** Locus tag and gene name of interacting proteins are listed in the first four columns. The existence of the interaction in other PPI networks is shown in the fifth column. The sixth and seventh column highlights whether the interacting proteins has been detected in a PPI module and whether one of the proteins is a central protein in a PPI module. (Continued from previous page)

| <b>Locus tag1</b> | <b>Locus tag2</b> | <b>Gene1</b> | <b>Gene2</b> | <b>Existing in other data sources</b> | <b>Id of a detected module</b> | <b>Central protein</b> |
|-------------------|-------------------|--------------|--------------|---------------------------------------|--------------------------------|------------------------|
| b0097             | b1620             | secM         | malI         | No                                    | -                              |                        |
| b0125             | b4505             | hpt          | insX         | No                                    | -                              |                        |
| b0125             | b3513             | hpt          | mdtE         | No                                    | -                              |                        |
| b0125             | b4126             | hpt          | yjdI         | No                                    | -                              |                        |
| b0125             | b4502             | hpt          | yeiW         | No                                    | -                              |                        |
| b0125             | ∅                 | hpt          | ∅            | No                                    | -                              |                        |
| b0435             | b0888             | bolA         | trxB         | No                                    | -                              |                        |
| b0435             | b2130             | bolA         | yehY         | Yes                                   | -                              |                        |
| b0435             | b2997             | bolA         | hybO         | No                                    | -                              |                        |
| b0435             | b0435             | bolA         | bolA         | Yes                                   | 404                            |                        |
| b0583             | b3357             | entD         | crp          | No                                    | -                              |                        |
| b0655             | b0652             | gltI         | gltL         | Yes                                   | 303                            |                        |
| b0655             | b0655             | gltI         | gltI         | Yes                                   | 303                            |                        |
| b0740             | b0425             | tolB         | panE         | No                                    | -                              |                        |
| b0740             | b0464             | tolB         | acrR         | No                                    | -                              |                        |
| b0740             | b0633             | tolB         | rlpA         | No                                    | -                              |                        |
| b0740             | b0947             | tolB         | ycbX         | No                                    | -                              |                        |
| b0740             | b1105             | tolB         | lpoB         | No                                    | -                              |                        |
| b0740             | b2714             | tolB         | ascG         | No                                    | -                              |                        |
| b0794             | b0041             | ybhF         | fixA         | No                                    | -                              |                        |
| b0872             | b4505             | hcr          | insX         | No                                    | -                              |                        |
| b0872             | b0601             | hcr          | ybdM         | No                                    | -                              |                        |
| b0872             | b2285             | hcr          | nuoE         | No                                    | -                              |                        |
| b0872             | b2868             | hcr          | xdhC         | No                                    | -                              |                        |
| b0872             | b2997             | hcr          | hybO         | No                                    | -                              |                        |
| b0872             | b3513             | hcr          | mdtE         | No                                    | -                              |                        |
| b0872             | b4126             | hcr          | yjdI         | No                                    | -                              |                        |
| b0872             | b4502             | hcr          | yeiW         | No                                    | -                              |                        |
| b0894             | b2980             | dmsA         | glcC         | No                                    | -                              |                        |
| b0894             | b3087             | dmsA         | ygjR         | No                                    | -                              |                        |
| b0894             | b3825             | dmsA         | pldB         | No                                    | -                              |                        |
| b0946             | b0464             | zapC         | acrR         | No                                    | -                              |                        |
| b0946             | b0601             | zapC         | ybdM         | No                                    | -                              |                        |
| b0946             | b1394             | zapC         | paaG         | No                                    | -                              |                        |
| b0946             | b2980             | zapC         | glcC         | No                                    | -                              |                        |
| b0946             | b4587             | zapC         | insN         | No                                    | -                              |                        |
| b0946             | b0946             | zapC         | zapC         | No                                    | 96                             |                        |
| b0946             | b2714             | zapC         | ascG         | No                                    | -                              |                        |
| b0946             | b3357             | zapC         | crp          | No                                    | -                              |                        |
| b0947             | b2764             | ycbX         | cysJ         | Yes                                   | 51                             |                        |
| b0947             | b0947             | ycbX         | ycbX         | Yes                                   | 51                             |                        |
| b0952             | b0464             | ymbA         | acrR         | No                                    | -                              |                        |

Continued on next page

Table S3: **Locus tag and gene id of detected protein interaction in Y2H data.** Locus tag and gene name of interacting proteins are listed in the first four columns. The existence of the interaction in other PPI networks is shown in the fifth column. The sixth and seventh column highlights whether the interacting proteins has been detected in a PPI module and whether one of the proteins is a central protein in a PPI module. (Continued from previous page)

| <b>Locus tag1</b> | <b>Locus tag2</b> | <b>Gene1</b> | <b>Gene2</b> | <b>Existing in other data sources</b> | <b>Id of a detected module</b> | <b>Central protein</b> |
|-------------------|-------------------|--------------|--------------|---------------------------------------|--------------------------------|------------------------|
| b0952             | b2173             | ymbA         | yeiR         | No                                    | -                              |                        |
| b0952             | b4379             | ymbA         | yjjW         | No                                    | -                              |                        |
| b0952             | b1391             | ymbA         | paaD         | No                                    | -                              |                        |
| b0968             | b4502             | yccX         | yeiW         | No                                    | -                              |                        |
| b1060             | b2440             | bssS         | eutC         | No                                    | -                              |                        |
| b1060             | b3262             | bssS         | yhdJ         | No                                    | -                              |                        |
| b1105             | b3986             | lpoB         | rpIL         | No                                    | -                              | RpIL                   |
| b1117             | b0151             | lolD         | fhuC         | No                                    | -                              |                        |
| b1191             | b4016             | cvrA         | aceK         | No                                    | -                              |                        |
| b1287             | b0889             | yciW         | lrp          | No                                    | -                              |                        |
| b1287             | b1275             | yciW         | cysB         | No                                    | -                              |                        |
| b1338             | b3042             | abgA         | yqiC         | No                                    | -                              |                        |
| b1361             | b4043             | ydaW         | lexA         | No                                    | -                              |                        |
| b1407             | b0975             | ydbD         | hyaD         | No                                    | -                              |                        |
| b1407             | b2325             | ydbD         | yfcL         | No                                    | -                              |                        |
| b1479             | b1973             | maeA         | zinT         | No                                    | -                              |                        |
| b1479             | b2335             | maeA         | yfcR         | No                                    | -                              |                        |
| b1479             | b3215             | maeA         | yhcA         | No                                    | -                              |                        |
| b1624             | b1624             | ydgJ         | ydgJ         | Yes                                   | 73                             |                        |
| b1697             | b1698             | ydiQ         | ydiR         | No                                    | -                              |                        |
| b1714             | b0223             | pheS         | yafJ         | No                                    | -                              |                        |
| b1714             | b0401             | pheS         | brnQ         | Yes                                   | 405                            |                        |
| b1714             | b0851             | pheS         | nfsA         | No                                    | -                              |                        |
| b1714             | b1713             | pheS         | pheT         | Yes                                   | -                              |                        |
| b1714             | b1990             | pheS         | erfK         | Yes                                   | 405                            |                        |
| b1714             | b3021             | pheS         | mqsA         | No                                    | -                              |                        |
| b1714             | b4587             | pheS         | insN         | No                                    | -                              |                        |
| b1714             | b1714             | pheS         | pheS         | Yes                                   | 405                            |                        |
| b1772             | b0199             | ydjH         | metN         | No                                    | -                              | MetN                   |
| b1772             | b0964             | ydjH         | yccT         | No                                    | -                              |                        |
| b1786             | b4081             | yeaJ         | mdtO         | No                                    | -                              |                        |
| b1836             | b0422             | yebV         | xseB         | No                                    | -                              |                        |
| b1836             | b1284             | yebV         | yciT         | No                                    | 26                             |                        |
| b1836             | b1658             | yebV         | purR         | No                                    | 26                             | PurR                   |
| b1836             | b1827             | yebV         | kdgR         | Yes                                   | 26                             | KdgR                   |
| b1836             | b3261             | yebV         | fis          | No                                    | -                              |                        |
| b1836             | b1836             | yebV         | yebV         | No                                    | 26                             |                        |
| b1836             | b1953             | yebV         | yodD         | Yes                                   | 26                             |                        |
| b1837             | b2440             | yebW         | eutC         | No                                    | -                              |                        |
| b2107             | b0819             | rcnB         | ybiS         | Yes                                   | 169                            |                        |
| b2125             | b0146             | yehT         | sfsA         | No                                    | 31                             | SfsA, YehT             |
| b2125             | b0199             | yehT         | metN         | No                                    | -                              | MetN, YehT             |

Continued on next page



Table S3: **Locus tag and gene id of detected protein interaction in Y2H data.** Locus tag and gene name of interacting proteins are listed in the first four columns. The existence of the interaction in other PPI networks is shown in the fifth column. The sixth and seventh column highlights whether the interacting proteins has been detected in a PPI module and whether one of the proteins is a central protein in a PPI module. (Continued from previous page)

| <b>Locus tag1</b> | <b>Locus tag2</b> | <b>Gene1</b> | <b>Gene2</b> | <b>Existing in other data sources</b> | <b>Id of a detected module</b> | <b>Central protein</b> |
|-------------------|-------------------|--------------|--------------|---------------------------------------|--------------------------------|------------------------|
| b2125             | b2125             | yehT         | yehT         | No                                    | 31                             | YehT                   |
| b2134             | b2285             | pbpG         | nuoE         | No                                    | -                              |                        |
| b2134             | b3021             | pbpG         | mqsA         | No                                    | -                              |                        |
| b2134             | b3082             | pbpG         | higA         | No                                    | -                              |                        |
| b2134             | b4016             | pbpG         | aceK         | No                                    | -                              |                        |
| b2134             | b1105             | pbpG         | lpoB         | No                                    | -                              |                        |
| b2134             | b2123             | pbpG         | yehR         | No                                    | -                              |                        |
| b2134             | b2496             | pbpG         | hda          | No                                    | -                              |                        |
| b2134             | b2511             | pbpG         | der          | No                                    | -                              |                        |
| b4502             | b2980             | yeiW         | glcC         | No                                    | -                              |                        |
| b4502             | b3239             | yeiW         | yhcO         | No                                    | -                              |                        |
| b2201             | b0464             | ccmA         | acrR         | No                                    | -                              |                        |
| b2201             | b3239             | ccmA         | yhcO         | No                                    | -                              |                        |
| b2264             | b2264             | menD         | menD         | Yes                                   | 188                            |                        |
| b2264             | b3526             | menD         | kdgK         | Yes                                   | 188                            |                        |
| b2496             | b3021             | hda          | mqsA         | No                                    | -                              |                        |
| b2496             | b2496             | hda          | hda          | Yes                                   | 203                            |                        |
| b2608             | b0077             | rimM         | ilvI         | No                                    | -                              |                        |
| b2608             | b0601             | rimM         | ybdM         | No                                    | -                              |                        |
| b2608             | b2907             | rimM         | ubiH         | No                                    | -                              |                        |
| b2608             | b1831             | rimM         | proQ         | No                                    | -                              |                        |
| b2708             | b4505             | gutQ         | insX         | No                                    | -                              |                        |
| b2712             | b0199             | hypF         | metN         | No                                    | -                              | MetN                   |
| b2712             | b0530             | hypF         | sfmA         | No                                    | -                              |                        |
| b2712             | b0796             | hypF         | ybiH         | No                                    | -                              |                        |
| b2712             | b1176             | hypF         | minC         | No                                    | -                              |                        |
| b2712             | b1895             | hypF         | uspC         | No                                    | -                              |                        |
| b2712             | b3304             | hypF         | rplR         | No                                    | -                              |                        |
| b2712             | b0946             | hypF         | zapC         | No                                    | -                              |                        |
| b2714             | b2714             | ascG         | ascG         | No                                    | 31                             |                        |
| b2769             | b2770             | ygcQ         | ygcR         | No                                    | -                              |                        |
| b2798             | b1916             | ygdG         | sdiA         | No                                    | -                              |                        |
| b2844             | b2844             | yqeF         | yqeF         | No                                    | 20                             |                        |
| b2909             | b2646             | ygfB         | ypjF         | No                                    | -                              |                        |
| b2909             | b2980             | ygfB         | glcC         | No                                    | -                              |                        |
| b2909             | b3180             | ygfB         | yhbY         | No                                    | -                              |                        |
| b2909             | b1831             | ygfB         | proQ         | No                                    | -                              |                        |
| b2909             | b3262             | ygfB         | yhdJ         | No                                    | -                              |                        |
| b2909             | b3825             | ygfB         | pldb         | No                                    | -                              |                        |
| b2953             | b1156             | yggU         | tfaE         | No                                    | -                              |                        |
| b2953             | b2456             | yggU         | eutN         | No                                    | -                              |                        |
| b3076             | b0356             | ebgA         | frmA         | No                                    | -                              |                        |

Continued on next page

Table S3: **Locus tag and gene id of detected protein interaction in Y2H data.** Locus tag and gene name of interacting proteins are listed in the first four columns. The existence of the interaction in other PPI networks is shown in the fifth column. The sixth and seventh column highlights whether the interacting proteins has been detected in a PPI module and whether one of the proteins is a central protein in a PPI module. (Continued from previous page)

| Locus tag1 | Locus tag2 | Gene1 | Gene2 | Existing in other data sources | Id of a detected module | Central protein |
|------------|------------|-------|-------|--------------------------------|-------------------------|-----------------|
| b3076      | b1080      | ebgA  | flgI  | No                             | -                       |                 |
| b3076      | b1670      | ebgA  | ydhU  | No                             | -                       |                 |
| b3076      | b1850      | ebgA  | eda   | No                             | -                       |                 |
| b3076      | b2622      | ebgA  | intA  | Yes                            | -                       | IntA            |
| b3162      | b3162      | deaD  | deaD  | Yes                            | 66                      | DeaD            |
| b3191      | b0463      | m1aB  | acrA  | No                             | -                       |                 |
| b3191      | b1703      | m1aB  | ppsR  | No                             | -                       |                 |
| b3210      | b2181      | arcB  | yejG  | No                             | -                       |                 |
| b3210      | b1117      | arcB  | lolD  | No                             | -                       |                 |
| b3270      | b0185      | yhdY  | accA  | No                             | -                       |                 |
| b3270      | b2316      | yhdY  | accD  | No                             | -                       |                 |
| b3998      | b3998      | nfi   | nfi   | Yes                            | 274                     |                 |
| b3967      | b0223      | murI  | yafJ  | No                             | -                       |                 |
| b3967      | b0610      | murI  | rnk   | No                             | -                       |                 |
| b3967      | b1703      | murI  | ppsR  | No                             | -                       |                 |
| b3967      | b2980      | murI  | glcC  | No                             | -                       |                 |
| b3967      | b3540      | murI  | dppF  | No                             | -                       |                 |
| b3967      | b4379      | murI  | yjjW  | No                             | -                       |                 |
| b3967      | b3967      | murI  | murI  | Yes                            | 3                       |                 |
| b3910      | b3910      | yiiM  | yiiM  | No                             | 102                     |                 |
| b3871      | b0948      | typA  | rlmL  | No                             | -                       | TypA            |
| b3871      | b1831      | typA  | proQ  | No                             | -                       | TypA            |
| b3871      | b3871      | typA  | typA  | Yes                            | 90                      | TypA            |
| b3856      | b3856      | mobB  | mobB  | Yes                            | 92                      |                 |
| b3833      | b1183      | ubiE  | umuD  | No                             | -                       |                 |
| b3833      | b3385      | ubiE  | gph   | No                             | -                       |                 |
| b4481      | b2105      | wecF  | rcnR  | No                             | -                       |                 |
| b4481      | b2676      | wecF  | nrdF  | No                             | -                       |                 |
| b4481      | b3357      | wecF  | crp   | No                             | -                       |                 |
| b3778      | b1831      | rep   | proQ  | No                             | -                       |                 |
| b4480      | b0223      | hdfR  | yafJ  | No                             | -                       |                 |
| b4480      | b0464      | hdfR  | acrR  | No                             | -                       |                 |
| b4480      | b1183      | hdfR  | umuD  | No                             | -                       |                 |
| b4479      | b4479      | dgoR  | dgoR  | Yes                            | 90                      |                 |
| b3554      | b3550      | yaF   | yaC   | No                             | -                       |                 |
| b3546      | b4505      | eptB  | insX  | No                             | -                       |                 |
| b3546      | b2980      | eptB  | glcC  | No                             | -                       |                 |
| b3546      | b3021      | eptB  | mqsA  | No                             | -                       |                 |
| b3546      | b3357      | eptB  | crp   | No                             | -                       |                 |
| b3533      | b1631      | bcsA  | rsxG  | No                             | -                       |                 |
| b3526      | b3526      | kdgK  | kdgK  | No                             | 188                     |                 |
| b3497      | b0044      | rsmJ  | fixX  | No                             | -                       |                 |

Continued on next page

Table S3: **Locus tag and gene id of detected protein interaction in Y2H data.** Locus tag and gene name of interacting proteins are listed in the first four columns. The existence of the interaction in other PPI networks is shown in the fifth column. The sixth and seventh column highlights whether the interacting proteins has been detected in a PPI module and whether one of the proteins is a central protein in a PPI module. (Continued from previous page)

| <b>Locus tag1</b> | <b>Locus tag2</b> | <b>Gene1</b> | <b>Gene2</b> | <b>Existing in other data sources</b> | <b>Id of a detected module</b> | <b>Central protein</b> |
|-------------------|-------------------|--------------|--------------|---------------------------------------|--------------------------------|------------------------|
| b3497             | b1156             | rsmJ         | tfaE         | No                                    | -                              |                        |
| b3497             | b2012             | rsmJ         | yeeD         | No                                    | -                              |                        |
| b3497             | b4379             | rsmJ         | yjjW         | No                                    | -                              |                        |
| b3497             | b1831             | rsmJ         | proQ         | No                                    | -                              |                        |
| b3497             | b2522             | rsmJ         | sseB         | No                                    | -                              |                        |
| b3497             | b4342             | rsmJ         | yjiT         | No                                    | -                              |                        |
| b3472             | b2086             | dcrB         | yegS         | No                                    | 104                            |                        |
| b3472             | b3472             | dcrB         | dcrB         | No                                    | 104                            |                        |
| b3424             | b0889             | glpG         | lrp          | No                                    | -                              |                        |
| b3375             | b0464             | frlR         | acrR         | No                                    | -                              |                        |
| b3375             | b2980             | frlR         | glcC         | No                                    | -                              |                        |
| b3375             | b2714             | frlR         | ascG         | No                                    | -                              |                        |
| b3375             | b3357             | frlR         | crp          | No                                    | -                              |                        |
| b4474             | b2996             | frlC         | hybA         | No                                    | -                              |                        |
| b3357             | b0119             | crp          | yacL         | Yes                                   | -                              |                        |
| b3357             | b2255             | crp          | arnA         | No                                    | -                              |                        |
| b3357             | b3982             | crp          | nusG         | No                                    | -                              |                        |
| b4039             | b4039             | ubiC         | ubiC         | Yes                                   | 56                             |                        |
| b4060             | b0172             | yjcB         | frr          | No                                    | -                              |                        |
| b4060             | b1156             | yjcB         | tfaE         | No                                    | -                              |                        |
| b4060             | b2456             | yjcB         | eutN         | No                                    | -                              |                        |
| b4060             | b1831             | yjcB         | proQ         | No                                    | -                              |                        |
| b4084             | b4084             | alsK         | alsK         | No                                    | 382                            |                        |
| b4097             | b3492             | phnK         | yhiN         | No                                    | -                              |                        |
| b4097             | b4096             | phnK         | phnL         | No                                    | 52                             |                        |
| b4188             | b0044             | yjfN         | fixX         | No                                    | -                              |                        |
| b4188             | b1973             | yjfN         | zinT         | No                                    | -                              |                        |
| b4188             | b2334             | yjfN         | yfcQ         | No                                    | -                              |                        |
| b4188             | b2997             | yjfN         | hybO         | No                                    | -                              |                        |
| b4207             | b2713             | fklB         | hydN         | No                                    | -                              | FklB                   |
| b4207             | b2996             | fklB         | hybA         | No                                    | -                              | FklB                   |
| b4207             | b4286             | fklB         | yjhV         | No                                    | -                              | FklB                   |
| b4207             | b4207             | fklB         | fklB         | Yes                                   | 233                            | FklB                   |
| b4352             | b3495             | yjiA         | uspA         | No                                    | 245                            |                        |
| b0073             | b0077             | leuB         | ilvI         | No                                    | -                              |                        |
| b0073             | b0223             | leuB         | yafJ         | No                                    | -                              |                        |
| b0685             | b3021             | ybfE         | mqsA         | No                                    | -                              |                        |
| b0685             | b1831             | ybfE         | proQ         | No                                    | -                              |                        |
| b0685             | b3825             | ybfE         | pldb         | No                                    | -                              |                        |
| b1597             | b0956             | asr          | matP         | No                                    | -                              |                        |
| b1597             | b1580             | asr          | rspB         | No                                    | -                              |                        |
| b2891             | b1916             | prfB         | sdiA         | No                                    | -                              |                        |

Continued on next page

Table S3: **Locus tag and gene id of detected protein interaction in Y2H data.** Locus tag and gene name of interacting proteins are listed in the first four columns. The existence of the interaction in other PPI networks is shown in the fifth column. The sixth and seventh column highlights whether the interacting proteins has been detected in a PPI module and whether one of the proteins is a central protein in a PPI module. (Continued from previous page)

| <b>Locus tag1</b> | <b>Locus tag2</b> | <b>Gene1</b> | <b>Gene2</b> | <b>Existing in other data sources</b> | <b>Id of a detected module</b> | <b>Central protein</b> |
|-------------------|-------------------|--------------|--------------|---------------------------------------|--------------------------------|------------------------|
| b3826             | b1973             | yigL         | zinT         | No                                    | -                              |                        |
| b3826             | b1831             | yigL         | proQ         | No                                    | -                              |                        |
| b4346             | b4180             | mcrB         | rlmB         | No                                    | -                              |                        |
| b4346             | b4346             | mcrB         | mcrB         | Yes                                   | 532                            |                        |
| b4555             | b0601             | yicS         | ybdM         | No                                    | -                              |                        |
| b4555             | b0719             | yicS         | ybgD         | No                                    | -                              |                        |
| b4555             | b2012             | yicS         | yeeD         | No                                    | -                              |                        |
| b4555             | b1831             | yicS         | proQ         | No                                    | -                              |                        |
| b4555             | b4502             | yicS         | yeiW         | No                                    | -                              |                        |
| b0467             | b3042             | priC         | yqiC         | No                                    | -                              |                        |
| b1355             | b2714             | ydaG         | ascG         | No                                    | -                              |                        |
| b0516             | b0504             | allC         | allS         | No                                    | -                              |                        |
| b2725             | b3749             | hycA         | rbsA         | No                                    | -                              |                        |
| b2154             | b0551             | yeiG         | quuD         | No                                    | -                              |                        |
| b0817             | b0935             | mntR         | ssuD         | No                                    | -                              |                        |
| b0662             | b2326             | ubiF         | epmC         | No                                    | -                              |                        |
| b0662             | b4505             | ubiF         | insX         | No                                    | -                              |                        |
| b0695             | b3204             | kdpD         | ptsN         | No                                    | -                              |                        |
| b0727             | b0116             | sucB         | lpd          | Yes                                   | -                              |                        |
| b0750             | b0601             | nadA         | ybdM         | No                                    | -                              |                        |
| b1812             | b3360             | pabB         | pabA         | Yes                                   | 143                            |                        |
| b1939             | b3360             | fliG         | pabA         | No                                    | -                              |                        |
| b1941             | b3306             | fliI         | rpsH         | No                                    | -                              |                        |
| b1603             | b3306             | pntA         | rpsH         | No                                    | -                              |                        |
| b1089             | b3306             | rpmF         | rpsH         | No                                    | -                              |                        |
| b1559             | b3262             | quuQ         | yhdJ         | No                                    | -                              |                        |
| b1559             | b2582             | quuQ         | trxC         | No                                    | -                              |                        |
| b1559             | b4043             | quuQ         | lexA         | No                                    | -                              |                        |
| b1258             | b0779             | yicF         | uvrB         | No                                    | -                              |                        |
| b1450             | b3077             | mcbR         | ebgC         | No                                    | -                              |                        |
| b1450             | b3492             | mcbR         | yhiN         | No                                    | -                              |                        |
| b1638             | b3479             | pdxH         | nikD         | No                                    | -                              |                        |
| b1523             | b1099             | yneG         | holB         | No                                    | -                              |                        |
| b1523             | b4181             | yneG         | yjfl         | No                                    | -                              |                        |
| b2066             | b0607             | udk          | uspG         | No                                    | -                              |                        |
| b2079             | b1926             | baeR         | fliT         | No                                    | -                              |                        |
| b2249             | b3306             | yfaY         | rpsH         | No                                    | -                              |                        |
| b2869             | b3306             | ygeV         | rpsH         | No                                    | -                              |                        |
| b2869             | b3170             | ygeV         | rimP         | No                                    | -                              |                        |
| b1939             | b2440             | fliG         | eutC         | No                                    | -                              |                        |
| b1939             | b2714             | fliG         | ascG         | No                                    | -                              |                        |
| b1939             | b0948             | fliG         | rlmL         | No                                    | -                              |                        |

Continued on next page

Table S3: **Locus tag and gene id of detected protein interaction in Y2H data.** Locus tag and gene name of interacting proteins are listed in the first four columns. The existence of the interaction in other PPI networks is shown in the fifth column. The sixth and seventh column highlights whether the interacting proteins has been detected in a PPI module and whether one of the proteins is a central protein in a PPI module. (Continued from previous page)

| <b>Locus tag1</b> | <b>Locus tag2</b> | <b>Gene1</b> | <b>Gene2</b> | <b>Existing in other data sources</b> | <b>Id of a detected module</b> | <b>Central protein</b> |
|-------------------|-------------------|--------------|--------------|---------------------------------------|--------------------------------|------------------------|
| b1945             | b1939             | fliM         | fliG         | Yes                                   | 6                              |                        |
| b2416             | b2980             | ptsI         | glcC         | No                                    | -                              |                        |
| b2416             | b0535             | ptsI         | fimZ         | No                                    | -                              |                        |
| b1945             | b2325             | fliM         | yfcL         | No                                    | -                              |                        |
| b4109             | b0700             | yjdA         | rhcC         | No                                    | -                              |                        |
| b4109             | b1275             | yjdA         | cysB         | No                                    | -                              |                        |
| b2478             | b2478             | dapA         | dapA         | Yes                                   | 10                             |                        |
| b3723             | b2701             | bglG         | mltB         | No                                    | -                              | BglG                   |
| b3470             | b2530             | tusA         | iscS         | Yes                                   | -                              | IscS                   |
| b3448             | b0881             | yhhA         | clpS         | No                                    | -                              |                        |
| b3698             | b1390             | yidB         | paaC         | No                                    | -                              |                        |
| b3704             | b3195             | rnpA         | mfaF         | No                                    | -                              |                        |
| b4558             | b3314             | yifL         | rpsC         | No                                    | -                              |                        |
| b3742             | b2382             | mioC         | ypdC         | No                                    | -                              |                        |
| b3742             | b4118             | mioC         | melR         | No                                    | -                              |                        |
| b3764             | b2334             | yifE         | yfcQ         | No                                    | -                              |                        |
| b3807             | b2334             | cyaY         | yfcQ         | No                                    | -                              |                        |
| b3807             | b1174             | cyaY         | minE         | No                                    | -                              |                        |
| b3858             | b1973             | yihD         | zinT         | No                                    | -                              |                        |
| b3923             | b0286             | uspD         | paoA         | No                                    | -                              |                        |
| b3923             | b0530             | uspD         | sfmA         | No                                    | -                              |                        |
| b3923             | b1973             | uspD         | zinT         | No                                    | -                              |                        |
| b3936             | b0835             | rpmE         | rimO         | No                                    | -                              |                        |
| b3964             | b0835             | yijD         | rimO         | No                                    | -                              |                        |
| b3964             | b2456             | yijD         | eutN         | No                                    | -                              |                        |
| b3922             | b1585             | yiiS         | ynfC         | No                                    | -                              |                        |
| b3922             | b2456             | yiiS         | eutN         | No                                    | -                              |                        |
| b3922             | b1174             | yiiS         | minE         | No                                    | -                              |                        |
| b3995             | b2415             | rsd          | ptsH         | No                                    | -                              |                        |
| b3781             | b0041             | trxA         | fixA         | No                                    | -                              |                        |
| b3781             | b2562             | trxA         | yfhL         | No                                    | -                              |                        |
| b3781             | b2997             | trxA         | hybO         | No                                    | -                              |                        |
| b3781             | b4367             | trxA         | fhuF         | No                                    | -                              |                        |
| b3781             | b2720             | trxA         | hycF         | No                                    | -                              |                        |
| b3378             | b1585             | yhfU         | ynfC         | No                                    | -                              |                        |
| b0058             | b0885             | rluA         | aat          | No                                    | -                              |                        |
| b0058             | b3043             | rluA         | ygiL         | No                                    | -                              |                        |
| b0058             | b4342             | rluA         | yjiT         | No                                    | -                              |                        |
| b0058             | b0398             | rluA         | sbcD         | No                                    | -                              |                        |
| b0038             | b4011             | caiB         | yjaA         | No                                    | -                              |                        |
| b0049             | b0719             | apaH         | ybgD         | No                                    | -                              |                        |
| b0049             | b0530             | apaH         | sfmA         | No                                    | -                              |                        |

Continued on next page

Table S3: **Locus tag and gene id of detected protein interaction in Y2H data.** Locus tag and gene name of interacting proteins are listed in the first four columns. The existence of the interaction in other PPI networks is shown in the fifth column. The sixth and seventh column highlights whether the interacting proteins has been detected in a PPI module and whether one of the proteins is a central protein in a PPI module. (Continued from previous page)

| <b>Locus tag1</b> | <b>Locus tag2</b> | <b>Gene1</b> | <b>Gene2</b> | <b>Existing in other data sources</b> | <b>Id of a detected module</b> | <b>Central protein</b> |
|-------------------|-------------------|--------------|--------------|---------------------------------------|--------------------------------|------------------------|
| b0052             | b0052             | pdxA         | pdxA         | Yes                                   | 331                            |                        |
| b0052             | b3043             | pdxA         | ygiL         | No                                    | -                              |                        |
| b0052             | b0719             | pdxA         | ybgD         | No                                    | -                              |                        |
| b0059             | b0948             | rapA         | rlmL         | No                                    | -                              |                        |
| b0059             | b3262             | rapA         | yhdJ         | No                                    | -                              |                        |
| b0059             | b2980             | rapA         | glcC         | No                                    | -                              |                        |
| b0064             | b3043             | araC         | ygiL         | No                                    | -                              |                        |
| b0064             | b0719             | araC         | ybgD         | No                                    | -                              |                        |
| b0064             | b1837             | araC         | yebW         | No                                    | -                              |                        |
| b0067             | b0719             | thiP         | ybgD         | No                                    | -                              |                        |
| b0076             | b3256             | leuO         | accC         | No                                    | -                              |                        |
| b0076             | b2079             | leuO         | baeR         | No                                    | -                              |                        |
| b0076             | b1105             | leuO         | lpoB         | No                                    | -                              |                        |
| b0080             | b0080             | cra          | cra          | Yes                                   | 262                            |                        |
| b0088             | b0450             | murD         | glnK         | No                                    | -                              |                        |
| b0098             | b0719             | secA         | ybgD         | No                                    | -                              | SecA                   |
| b0092             | b0530             | ddlB         | sfmA         | No                                    | -                              |                        |
| b0092             | b0719             | ddlB         | ybgD         | No                                    | -                              |                        |
| b0099             | b3043             | mutT         | ygiL         | No                                    | -                              |                        |
| b0099             | b0719             | mutT         | ybgD         | No                                    | -                              |                        |
| b3352             | b1778             | yheS         | msrB         | No                                    | -                              |                        |
| b3352             | b2334             | yheS         | yfcQ         | No                                    | -                              |                        |
| b3352             | b2335             | yheS         | yfcR         | No                                    | -                              |                        |
| b3352             | b0530             | yheS         | sfmA         | No                                    | -                              |                        |
| b3431             | b0719             | glgX         | ybgD         | No                                    | -                              |                        |
| b3431             | b2334             | glgX         | yfcQ         | No                                    | -                              |                        |
| b3431             | b1585             | glgX         | ynfC         | No                                    | -                              |                        |
| b3431             | b3043             | glgX         | ygiL         | No                                    | -                              |                        |
| b3431             | b4219             | glgX         | msrA         | No                                    | -                              |                        |
| b3431             | b0530             | glgX         | sfmA         | No                                    | -                              |                        |
| b3671             | b3670             | ilvB         | ilvN         | Yes                                   | 170                            |                        |
| b3722             | b3170             | bglF         | rimP         | No                                    | -                              |                        |
| b4297             | b4297             | yjhG         | yjhG         | Yes                                   | 3                              |                        |
| b4006             | b4006             | purH         | purH         | No                                    | 206                            |                        |
| b3189             | b0530             | murA         | sfmA         | No                                    | -                              |                        |
| b3197             | b3043             | kdsD         | ygiL         | No                                    | -                              |                        |
| b3197             | b0719             | kdsD         | ybgD         | No                                    | -                              |                        |
| b0578             | b0578             | nfsB         | nfsB         | Yes                                   | 214                            |                        |
| b0587             | b1200             | fepE         | dhaK         | No                                    | -                              |                        |
| b0587             | b0043             | fepE         | fixC         | No                                    | -                              |                        |
| b0587             | b0006             | fepE         | yaaA         | No                                    | -                              |                        |
| b0587             | b1604             | fepE         | ydgH         | No                                    | -                              |                        |

Continued on next page

Table S3: **Locus tag and gene id of detected protein interaction in Y2H data.** Locus tag and gene name of interacting proteins are listed in the first four columns. The existence of the interaction in other PPI networks is shown in the fifth column. The sixth and seventh column highlights whether the interacting proteins has been detected in a PPI module and whether one of the proteins is a central protein in a PPI module. (Continued from previous page)

| <b>Locus tag1</b> | <b>Locus tag2</b> | <b>Gene1</b> | <b>Gene2</b> | <b>Existing in other data sources</b> | <b>Id of a detected module</b> | <b>Central protein</b> |
|-------------------|-------------------|--------------|--------------|---------------------------------------|--------------------------------|------------------------|
| b3749             | b3418             | rbsA         | malT         | No                                    | -                              |                        |
| b4093             | b0413             | phnO         | nrdR         | No                                    | -                              |                        |
| b4244             | b4245             | pyrI         | pyrB         | Yes                                   | 578                            |                        |
| b4302             | b2701             | sgcA         | mltB         | No                                    | -                              |                        |
| b4302             | b1013             | sgcA         | rutR         | No                                    | -                              |                        |
| b4302             | b4505             | sgcA         | insX         | No                                    | -                              |                        |
| b4302             | b1176             | sgcA         | minC         | No                                    | -                              |                        |
| b4302             | b3982             | sgcA         | nusG         | No                                    | -                              |                        |
| b4302             | b2714             | sgcA         | ascG         | No                                    | -                              |                        |
| b4393             | b2334             | trpR         | yfcQ         | No                                    | -                              |                        |
| b1355             | b2701             | ydaG         | mltB         | No                                    | -                              |                        |
| b1355             | b4299             | ydaG         | yjhI         | No                                    | -                              |                        |
| b1355             | b4379             | ydaG         | yjjW         | No                                    | -                              |                        |
| b0151             | b4011             | fluC         | yjaA         | No                                    | -                              |                        |
| b0320             | b0319             | yahF         | yahE         | No                                    | -                              |                        |
| b0347             | b0321             | mhpA         | yahG         | No                                    | -                              |                        |
| b0717             | b2696             | ybgP         | csrA         | No                                    | -                              |                        |
| b0719             | b2123             | ybgD         | yehR         | No                                    | -                              |                        |
| b0721             | b1698             | sdhC         | ydiR         | No                                    | -                              |                        |
| b2809             | b3314             | ygdI         | rpsC         | No                                    | -                              |                        |
| b4217             | b4062             | ytfK         | soxS         | No                                    | -                              |                        |
| b4217             | b1604             | ytfK         | ydgH         | No                                    | -                              |                        |
| b3466             | b1973             | yhhL         | zinT         | No                                    | -                              |                        |
| b0968             | b1174             | yccX         | minE         | No                                    | -                              |                        |
| b0968             | b0530             | yccX         | sfmA         | No                                    | -                              |                        |
| b2754             | b2334             | ygbF         | yfcQ         | No                                    | -                              |                        |
| b2754             | b1973             | ygbF         | zinT         | No                                    | -                              |                        |
| b2953             | b1585             | yggU         | ynfC         | No                                    | -                              |                        |
| b1362             | b0998             | rzpR         | torD         | No                                    | -                              |                        |
| b0435             | b4379             | bolA         | yjjW         | No                                    | -                              |                        |
| b0435             | b2415             | bolA         | ptsH         | No                                    | -                              |                        |
| b0435             | b1390             | bolA         | paaC         | No                                    | -                              |                        |
| b0435             | b4299             | bolA         | yjhI         | No                                    | -                              |                        |
| b0435             | b2562             | bolA         | yfhL         | No                                    | -                              |                        |
| b1117             | b3925             | lolD         | glpX         | No                                    | -                              |                        |
| b0938             | b1585             | elfA         | ynfC         | No                                    | -                              |                        |
| b2702             | b1391             | srlA         | paaD         | No                                    | -                              |                        |
| b2135             | b3540             | yohC         | dppF         | No                                    | -                              |                        |
| b2135             | b3043             | yohC         | ygiL         | No                                    | -                              |                        |
| b0294             | b2770             | ecpR         | ygcR         | No                                    | -                              |                        |
| b0795             | b0719             | ybhG         | ybgD         | No                                    | -                              |                        |
| b4331             | b0719             | kptA         | ybgD         | No                                    | -                              |                        |

Continued on next page

Table S3: **Locus tag and gene id of detected protein interaction in Y2H data.** Locus tag and gene name of interacting proteins are listed in the first four columns. The existence of the interaction in other PPI networks is shown in the fifth column. The sixth and seventh column highlights whether the interacting proteins has been detected in a PPI module and whether one of the proteins is a central protein in a PPI module. (Continued from previous page)

| <b>Locus tag1</b> | <b>Locus tag2</b> | <b>Gene1</b> | <b>Gene2</b> | <b>Existing in other data sources</b> | <b>Id of a detected module</b> | <b>Central protein</b> |
|-------------------|-------------------|--------------|--------------|---------------------------------------|--------------------------------|------------------------|
| b4331             | b3043             | kptA         | ygiL         | No                                    | -                              |                        |
| b4331             | b0530             | kptA         | sfmA         | No                                    | -                              |                        |
| b4342             | b4161             | yjiT         | rsgA         | No                                    | -                              | RsgA                   |
| b4206             | b3043             | ytfB         | ygiL         | No                                    | -                              |                        |
| b4206             | b0719             | ytfB         | ybgD         | No                                    | -                              |                        |
| b3067             | b0064             | rpoD         | araC         | No                                    | -                              |                        |
| b4043             | b0064             | lexA         | araC         | No                                    | -                              |                        |
| b3067             | b3905             | rpoD         | rhaS         | Yes                                   | -                              | RhaS                   |
| b3067             | b3906             | rpoD         | rhaR         | Yes                                   | 105                            |                        |
| b3067             | b4118             | rpoD         | melR         | Yes                                   | -                              |                        |
| b3067             | b1735             | rpoD         | chbR         | No                                    | -                              |                        |
| b0064             | b0064             | araC         | araC         | Yes                                   | 74                             |                        |
| b0064             | b1735             | araC         | chbR         | No                                    | -                              |                        |
| b3906             | b4043             | rhaR         | lexA         | No                                    | -                              |                        |
| b3906             | b1735             | rhaR         | chbR         | No                                    | -                              |                        |
| b3067             | b4043             | rpoD         | lexA         | No                                    | -                              |                        |
| b3067             | b2382             | rpoD         | ypdC         | No                                    | -                              |                        |
| b4043             | b4043             | lexA         | lexA         | Yes                                   | 86                             |                        |
| b4043             | b1735             | lexA         | chbR         | No                                    | -                              |                        |
| b1735             | b3067             | chbR         | rpoD         | No                                    | -                              |                        |
| b1735             | b4043             | chbR         | lexA         | No                                    | -                              |                        |
| b1735             | b1735             | chbR         | chbR         | No                                    | 1                              |                        |
| b2382             | b3067             | ypdC         | rpoD         | No                                    | -                              |                        |
| b2382             | b4043             | ypdC         | lexA         | No                                    | -                              |                        |
| b2382             | b0064             | ypdC         | araC         | No                                    | -                              |                        |
| b2382             | b2382             | ypdC         | ypdC         | No                                    | 225                            |                        |
| b3905             | b4043             | rhaS         | lexA         | No                                    | -                              | RhaS                   |
| b3905             | b0064             | rhaS         | araC         | No                                    | -                              | RhaS                   |
| b3905             | b1735             | rhaS         | chbR         | No                                    | -                              | RhaS                   |
| b3905             | b2382             | rhaS         | ypdC         | No                                    | -                              | RhaS                   |
| b0026             | b0975             | ileS         | hyaD         | Yes                                   | -                              |                        |
| b0026             | b4253             | ileS         | yjgL         | Yes                                   | -                              |                        |
| b0642             | b0139             | leuS         | htrE         | Yes                                   | -                              |                        |
| b2411             | b0642             | ligA         | leuS         | Yes                                   | -                              |                        |
| b1274             | b0642             | topA         | leuS         | Yes                                   | -                              |                        |
| b2411             | b2411             | ligA         | ligA         | Yes                                   | 181                            |                        |
| b2411             | b0975             | ligA         | hyaD         | No                                    | -                              |                        |
| b2411             | b3751             | ligA         | rbsB         | No                                    | -                              |                        |
| b1274             | b2411             | topA         | ligA         | No                                    | -                              |                        |
| b1274             | b0975             | topA         | hyaD         | Yes                                   | -                              |                        |
| b1274             | b3751             | topA         | rbsB         | No                                    | -                              |                        |
| b3751             | b2411             | rbsB         | ligA         | No                                    | -                              |                        |

Continued on next page



Table S3: **Locus tag and gene id of detected protein interaction in Y2H data.** Locus tag and gene name of interacting proteins are listed in the first four columns. The existence of the interaction in other PPI networks is shown in the fifth column. The sixth and seventh column highlights whether the interacting proteins has been detected in a PPI module and whether one of the proteins is a central protein in a PPI module. (Continued from previous page)

| <b>Locus tag1</b> | <b>Locus tag2</b> | <b>Gene1</b> | <b>Gene2</b> | <b>Existing in other data sources</b> | <b>Id of a detected module</b> | <b>Central protein</b> |
|-------------------|-------------------|--------------|--------------|---------------------------------------|--------------------------------|------------------------|
| b3751             | b1274             | rbsB         | topA         | No                                    | -                              |                        |
| b3751             | b0975             | rbsB         | hyaD         | No                                    | -                              |                        |
| b3751             | b3751             | rbsB         | rbsB         | Yes                                   | 335                            |                        |
| b3751             | b4253             | rbsB         | yjgL         | No                                    | -                              |                        |
| b4253             | b2411             | yjgL         | ligA         | No                                    | -                              |                        |
| b4253             | b0975             | yjgL         | hyaD         | No                                    | -                              |                        |
| b4253             | b3751             | yjgL         | rbsB         | No                                    | -                              |                        |
| b0139             | b2411             | htrE         | ligA         | No                                    | -                              |                        |
| b0139             | b0975             | htrE         | hyaD         | No                                    | -                              |                        |
| b0139             | b3751             | htrE         | rbsB         | No                                    | -                              |                        |
| b0780             | b2411             | ybhK         | ligA         | No                                    | -                              | YbhK                   |
| b0780             | b1274             | ybhK         | topA         | No                                    | -                              | YbhK                   |
| b0780             | b0975             | ybhK         | hyaD         | No                                    | -                              | YbhK                   |
| b0780             | b3751             | ybhK         | rbsB         | No                                    | -                              | YbhK                   |
| b0780             | b4253             | ybhK         | yjgL         | No                                    | -                              | YbhK                   |
| b0780             | b0139             | ybhK         | htrE         | No                                    | -                              | YbhK                   |
| b0780             | b0780             | ybhK         | ybhK         | Yes                                   | 40                             | YbhK                   |
| b0026             | b2411             | ileS         | ligA         | No                                    | -                              |                        |
| b0026             | b0780             | ileS         | ybhK         | No                                    | -                              | YbhK                   |
| b0642             | b0975             | leuS         | hyaD         | No                                    | -                              |                        |
| b0642             | b3751             | leuS         | rbsB         | No                                    | -                              |                        |
| b0642             | b0780             | leuS         | ybhK         | No                                    | -                              | YbhK                   |
| b0450             | b0450             | glnK         | glnK         | Yes                                   | 115                            |                        |
| b0450             | b3869             | glnK         | glnL         | Yes                                   | 115                            |                        |
| b0450             | b0451             | glnK         | amtB         | No                                    | -                              |                        |
| b0167             | b0450             | glnD         | glnK         | Yes                                   | -                              |                        |
| b2553             | b2553             | glnB         | glnB         | Yes                                   | 115                            |                        |
| b2553             | b3869             | glnB         | glnL         | Yes                                   | 115                            |                        |
| b2553             | b0167             | glnB         | glnD         | Yes                                   | -                              |                        |
| b2553             | b0451             | glnB         | amtB         | No                                    | -                              |                        |
| b2553             | b4255             | glnB         | rraB         | Yes                                   | -                              |                        |
| b3869             | b0167             | glnL         | glnD         | No                                    | -                              |                        |
| b3869             | b3869             | glnL         | glnL         | Yes                                   | 115                            |                        |
| b0451             | b3869             | amtB         | glnL         | No                                    | -                              |                        |
| b4255             | b3869             | rraB         | glnL         | No                                    | -                              |                        |
| b1225             | b1224             | narH         | narG         | Yes                                   | 92                             |                        |
| b1468             | b1225             | narZ         | narH         | Yes                                   | -                              |                        |
| b1225             | b3081             | narH         | fadH         | Yes                                   | -                              |                        |
| b1225             | b1466             | narH         | narW         | Yes                                   | -                              |                        |
| b1224             | b1467             | narG         | narY         | Yes                                   | -                              |                        |
| b3081             | b1467             | fadH         | narY         | Yes                                   | 163                            |                        |
| b1467             | b1466             | narY         | narW         | Yes                                   | 163                            |                        |

Continued on next page

Table S3: **Locus tag and gene id of detected protein interaction in Y2H data.** Locus tag and gene name of interacting proteins are listed in the first four columns. The existence of the interaction in other PPI networks is shown in the fifth column. The sixth and seventh column highlights whether the interacting proteins has been detected in a PPI module and whether one of the proteins is a central protein in a PPI module. (Continued from previous page)

| Locus tag1 | Locus tag2 | Gene1 | Gene2 | Existing in other data sources | Id of a detected module | Central protein |
|------------|------------|-------|-------|--------------------------------|-------------------------|-----------------|
| b0932      | b1467      | pepN  | narY  | Yes                            | -                       |                 |
| b1468      | b0932      | narZ  | pepN  | No                             | -                       |                 |
| b1468      | b1466      | narZ  | narW  | Yes                            | 163                     |                 |
| b1224      | b0932      | narG  | pepN  | No                             | -                       |                 |
| b1224      | b1466      | narG  | narW  | Yes                            | -                       |                 |
| b3081      | b0932      | fadH  | pepN  | No                             | -                       |                 |
| b0932      | b0932      | pepN  | pepN  | Yes                            | 413                     |                 |
| b1466      | b0932      | narW  | pepN  | No                             | -                       |                 |
| b1466      | b1466      | narW  | narW  | Yes                            | 163                     |                 |
| b1466      | b1468      | narW  | narZ  | Yes                            | 163                     |                 |
| b1466      | b1224      | narW  | narG  | Yes                            | -                       |                 |
| b1466      | b3081      | narW  | fadH  | No                             | 163                     |                 |
| b1225      | b0932      | narH  | pepN  | No                             | -                       |                 |
| b0026      | b3751      | ileS  | rbsB  | Yes                            | -                       |                 |
| b0072      | b0071      | leuC  | leuD  | Yes                            | 55                      |                 |
| b0082      | b4171      | rsmH  | miaA  | No                             | -                       |                 |
| b0091      | b0091      | murC  | murC  | Yes                            | 370                     |                 |
| b0099      | b4153      | mutT  | frdB  | No                             | -                       |                 |
| b0467      | b0779      | priC  | uvrB  | No                             | -                       |                 |
| b0581      | b2726      | ybdK  | hypA  | No                             | -                       |                 |
| b0723      | b2897      | sdhA  | cptB  | No                             | -                       | YdhA            |
| b1176      | b1176      | minC  | minC  | Yes                            | 448                     |                 |
| b1225      | b1467      | narH  | narY  | Yes                            | -                       |                 |
| b1807      | b3064      | tsaB  | tsaD  | Yes                            | 133                     |                 |
| b1887      | b3262      | cheW  | yhdJ  | No                             | -                       |                 |
| b1939      | b1105      | fliG  | lpoB  | No                             | -                       |                 |
| b1945      | b1946      | fliM  | fliN  | Yes                            | 6                       |                 |
| b2382      | b1735      | ypdC  | chbR  | No                             | -                       |                 |
| b2553      | b0450      | glnB  | glnK  | Yes                            | 115                     |                 |
| b3671      | b3769      | ilvB  | ilvM  | Yes                            | 170                     |                 |
| b3936      | b3021      | rpmE  | mqsA  | No                             | -                       |                 |
| b3995      | b3067      | rsd   | rpoD  | Yes                            | -                       |                 |
| b4259      | b4372      | holC  | holD  | Yes                            | 62                      | HolC            |
| b4372      | b4259      | holD  | holC  | Yes                            | 62                      | HolC            |
| b0435      | b2667      | bolA  | ygaV  | No                             | -                       |                 |
| b1117      | b2193      | lolD  | narP  | No                             | -                       |                 |
| b2583      | b3169      | yfiP  | nusA  | No                             | -                       |                 |
| b0399      | b0399      | phoB  | phoB  | Yes                            | 487                     |                 |
| b4399      | b4398      | creC  | creB  | Yes                            | 313                     |                 |
| b3405      | b0399      | ompR  | phoB  | No                             | -                       | OmpR            |
| b0571      | b0571      | cusR  | cusR  | No                             | 82                      | CusR            |
| b1969      | b0571      | yedW  | cusR  | No                             | -                       | CusR            |

Continued on next page

Table S3: **Locus tag and gene id of detected protein interaction in Y2H data.** Locus tag and gene name of interacting proteins are listed in the first four columns. The existence of the interaction in other PPI networks is shown in the fifth column. The sixth and seventh column highlights whether the interacting proteins has been detected in a PPI module and whether one of the proteins is a central protein in a PPI module. (Continued from previous page)

| <b>Locus tag1</b> | <b>Locus tag2</b> | <b>Gene1</b> | <b>Gene2</b> | <b>Existing in other data sources</b> | <b>Id of a detected module</b> | <b>Central protein</b> |
|-------------------|-------------------|--------------|--------------|---------------------------------------|--------------------------------|------------------------|
| b4398             | b4398             | creB         | creB         | No                                    | 313                            |                        |
| b0695             | b0694             | kdpD         | kdpE         | Yes                                   | 462                            |                        |
| b2079             | b2079             | baeR         | baeR         | No                                    | 95                             |                        |
| b3303             | b3318             | rpsE         | rplW         | Yes                                   | -                              | RpsE, RplW             |
| b0014             | b0473             | dnaK         | htpG         | Yes                                   | -                              | DnaK, HtpG             |
| b1269             | b0948             | rluB         | rlmL         | Yes                                   | 2                              | RluB                   |
| b2610             | b3464             | ffh          | ftsY         | Yes                                   | 360                            |                        |
| b3464             | b2610             | ftsY         | ffh          | Yes                                   | 360                            |                        |
| b4372             | b0470             | holD         | dnaX         | Yes                                   | -                              |                        |
| b1237             | b2669             | hns          | stpA         | Yes                                   | 97                             |                        |
| b2369             | b2370             | evgA         | evgS         | Yes                                   | 525                            |                        |
| b2576             | b1269             | srnB         | rluB         | Yes                                   | 2                              | RluB                   |
| b3256             | b3255             | accC         | accB         | Yes                                   | 65                             |                        |
| b1713             | b1714             | pheT         | pheS         | Yes                                   | -                              |                        |
| b3783             | b3982             | rho          | nusG         | Yes                                   | -                              |                        |
| b0033             | b0033             | carB         | carB         | Yes                                   | 51                             |                        |
| b0470             | b0215             | dnaX         | dnaQ         | Yes                                   | 36                             |                        |
| b2469             | b2193             | narQ         | narP         | Yes                                   | 435                            |                        |
| b4058             | b0779             | uvrA         | uvrB         | Yes                                   | -                              |                        |
| b4259             | b1099             | holC         | holB         | Yes                                   | -                              | HolC                   |
| b0640             | b0184             | holA         | dnaE         | Yes                                   | -                              | DnaE                   |
| b3934             | b3357             | cytR         | crp          | Yes                                   | 421                            |                        |
| b3357             | b3934             | crp          | cytR         | Yes                                   | 421                            |                        |
| b4355             | b1887             | tsr          | cheW         | Yes                                   | 30                             |                        |
| b1221             | b2469             | narL         | narQ         | No                                    | -                              |                        |
| b0215             | b1842             | dnaQ         | holE         | Yes                                   | -                              |                        |
| b0014             | b1000             | dnaK         | cbpA         | Yes                                   | -                              | DnaK                   |
| b0640             | b0215             | holA         | dnaQ         | Yes                                   | -                              |                        |
| b3164             | b2576             | pnp          | srnB         | Yes                                   | 2                              |                        |
| b2180             | b1246             | yejF         | oppD         | Yes                                   | -                              |                        |
| b1084             | b2576             | rne          | srnB         | Yes                                   | 2                              |                        |
| b1941             | b1941             | fliI         | fliI         | Yes                                   | 6                              |                        |
| b0723             | b0724             | sdhA         | sdhB         | Yes                                   | 46                             | SdhA                   |
| b2837             | b2837             | galR         | galR         | Yes                                   | 362                            |                        |
| b1763             | b2892             | topB         | recJ         | Yes                                   | -                              | TopB                   |
| b2576             | b2576             | srnB         | srnB         | Yes                                   | 2                              |                        |
| b1946             | b1946             | fliN         | fliN         | Yes                                   | 6                              |                        |
| b3778             | b3778             | rep          | rep          | Yes                                   | 384                            |                        |
| b3418             | b0015             | malT         | dnaJ         | Yes                                   | -                              | DnaJ                   |
| b1071             | b1922             | flgM         | fliA         | Yes                                   | -                              |                        |
| b1938             | b1939             | fliF         | fliG         | Yes                                   | 6                              |                        |
| b2837             | b2151             | galR         | galS         | No                                    | -                              |                        |

Continued on next page

Table S3: **Locus tag and gene id of detected protein interaction in Y2H data.** Locus tag and gene name of interacting proteins are listed in the first four columns. The existence of the interaction in other PPI networks is shown in the fifth column. The sixth and seventh column highlights whether the interacting proteins has been detected in a PPI module and whether one of the proteins is a central protein in a PPI module. (Continued from previous page)

| <b>Locus tag1</b> | <b>Locus tag2</b> | <b>Gene1</b> | <b>Gene2</b> | <b>Existing in other data sources</b> | <b>Id of a detected module</b> | <b>Central protein</b> |
|-------------------|-------------------|--------------|--------------|---------------------------------------|--------------------------------|------------------------|
| b3781             | b0888             | trxA         | trxB         | Yes                                   | 454                            |                        |
| b0098             | b0736             | secA         | ybgC         | Yes                                   | -                              | SecA                   |
| b1089             | b3637             | rpmF         | rpmB         | Yes                                   | 2                              | RpmB                   |
| b4143             | b3616             | groL         | tdh          | Yes                                   | 1                              | GroL                   |
| b4143             | b2614             | groL         | grpE         | Yes                                   | -                              | GroL                   |
| b3813             | b3778             | uvrD         | rep          | No                                    | -                              |                        |
| b0098             | b3175             | secA         | secG         | Yes                                   | 7                              | SecA                   |
| b3701             | b3701             | dnaN         | dnaN         | Yes                                   | 15                             | DnaN                   |
| b0595             | b0595             | entB         | entB         | Yes                                   | 233                            |                        |
| b3741             | b3706             | mnmG         | mnmE         | Yes                                   | -                              |                        |
| b1200             | b1201             | dhaK         | dhaR         | Yes                                   | -                              |                        |
| b2213             | b3067             | ada          | rpoD         | Yes                                   | 105                            |                        |
| b3357             | b3067             | crp          | rpoD         | Yes                                   | -                              |                        |
| b0199             | b2719             | metN         | hycG         | Yes                                   | -                              | MetN                   |
| b1740             | b3702             | nadE         | dnaA         | Yes                                   | -                              | NadE                   |
| b4372             | b1763             | hold         | topB         | Yes                                   | -                              | TopB                   |
| b2207             | b2206             | napD         | napA         | Yes                                   | -                              |                        |
| b2528             | b2525             | iscA         | fdx          | Yes                                   | -                              |                        |
| b2529             | b2529             | iscU         | iscU         | Yes                                   | 58                             | IscU                   |
| b3701             | b2496             | dnaN         | hda          | Yes                                   | -                              | DnaN                   |
| b4143             | b3520             | groL         | yhjB         | Yes                                   | -                              | GroL                   |
| b2286             | b2283             | nuoC         | nuoG         | Yes                                   | 35                             |                        |
| b4143             | b1704             | groL         | aroH         | Yes                                   | 1                              | GroL                   |
| b0888             | b2673             | trxB         | nrdH         | No                                    | -                              |                        |
| b0470             | b4059             | dnaX         | ssb          | No                                    | -                              |                        |
| b3723             | b0316             | bglG         | yahB         | Yes                                   | 157                            |                        |
| b0600             | b0184             | ybdL         | dnaE         | Yes                                   | 36                             | DnaE                   |
| b0421             | b1566             | ispA         | flxA         | Yes                                   | 49                             | IspA                   |
| b3418             | b0042             | malT         | fixB         | Yes                                   | -                              |                        |
| b3418             | b1942             | malT         | fliJ         | Yes                                   | -                              |                        |
| b2950             | b1854             | yggR         | pykA         | Yes                                   | 436                            |                        |
| b1410             | b2707             | ynbC         | srlR         | Yes                                   | -                              |                        |
| b0903             | b2707             | pflB         | srlR         | Yes                                   | -                              |                        |
| b3418             | b2517             | malT         | rlmN         | Yes                                   | -                              | RlmN                   |
| b1945             | b1945             | fliM         | fliM         | Yes                                   | 6                              |                        |
| b1884             | b2573             | cheR         | rpoE         | Yes                                   | -                              |                        |
| b1946             | b1941             | fliN         | fliI         | Yes                                   | 6                              |                        |
| b0225             | b0226             | yafQ         | dinJ         | Yes                                   | 347                            |                        |
| b1286             | b3303             | rnb          | rpsE         | Yes                                   | -                              | RpsE                   |
| b2838             | b3912             | lysA         | cpxR         | Yes                                   | 315                            |                        |
| b0918             | b1649             | kdsB         | nemR         | Yes                                   | 192                            | KdsB                   |
| b3813             | b3829             | uvrD         | metE         | Yes                                   | -                              |                        |

Continued on next page

Table S3: **Locus tag and gene id of detected protein interaction in Y2H data.** Locus tag and gene name of interacting proteins are listed in the first four columns. The existence of the interaction in other PPI networks is shown in the fifth column. The sixth and seventh column highlights whether the interacting proteins has been detected in a PPI module and whether one of the proteins is a central protein in a PPI module. (Continued from previous page)

| <b>Locus tag1</b> | <b>Locus tag2</b> | <b>Gene1</b> | <b>Gene2</b> | <b>Existing in other data sources</b> | <b>Id of a detected module</b> | <b>Central protein</b> |
|-------------------|-------------------|--------------|--------------|---------------------------------------|--------------------------------|------------------------|
| b2222             | b2595             | atoA         | bamD         | Yes                                   | -                              |                        |
| b2515             | b0292             | ispG         | ecpB         | Yes                                   | -                              |                        |
| b3182             | b3172             | dacB         | argG         | Yes                                   | 135                            |                        |
| b3317             | b3326             | rplB         | gspE         | Yes                                   | 2                              | RplB                   |
| b3061             | b3423             | ttdA         | glpR         | Yes                                   | 330                            |                        |
| b3506             | b3506             | slp          | slp          | Yes                                   | 23                             |                        |
| b2574             | b0750             | nadB         | nadA         | Yes                                   | 331                            |                        |
| b3357             | b0034             | crp          | caiF         | No                                    | -                              |                        |
| b3035             | b0740             | tolC         | tolB         | No                                    | -                              | TolC                   |
| b2781             | b2566             | mazG         | era          | Yes                                   | 1                              |                        |
| b3983             | b0172             | rplK         | frr          | No                                    | -                              |                        |
| b3357             | b3418             | crp          | malT         | No                                    | -                              |                        |
| b3701             | b0184             | dnaN         | dnaE         | Yes                                   | -                              | DnaN, DnaE             |
| b1924             | b1926             | fliD         | fliT         | Yes                                   | -                              |                        |
| b1807             | b4168             | tsaB         | tsaE         | No                                    | -                              |                        |
| b2207             | b2997             | napD         | hybO         | No                                    | -                              |                        |
| b3869             | b3868             | glnL         | glnG         | Yes                                   | 115                            |                        |
| b0695             | b0695             | kdpD         | kdpD         | Yes                                   | 462                            |                        |
| b0995             | b0993             | torR         | torS         | Yes                                   | 463                            |                        |
| b1130             | b1130             | phoP         | phoP         | No                                    | 452                            |                        |
| b3341             | b1269             | rpsG         | rluB         | Yes                                   | -                              | RluB, RpsG             |
| b0820             | b1290             | ybiT         | sapF         | Yes                                   | -                              |                        |
| b2802             | b2802             | fucI         | fucI         | Yes                                   | 13                             |                        |
| b2751             | b2752             | cysN         | cysD         | Yes                                   | 427                            |                        |
| b3780             | b3780             | rhlB         | rhlB         | Yes                                   | 2                              |                        |
| b4143             | b2731             | groL         | fhlA         | Yes                                   | -                              | GroL                   |
| b0078             | b0078             | ilvH         | ilvH         | Yes                                   | 492                            |                        |
| b2810             | b2811             | csdA         | csdE         | Yes                                   | 277                            |                        |
| b4051             | b4051             | qorA         | qorA         | No                                    | -                              |                        |
| b0759             | b0759             | galE         | galE         | Yes                                   | 497                            |                        |
| b3256             | b0414             | accC         | ribD         | Yes                                   | -                              | RibD                   |
| b2114             | b3317             | metG         | rplB         | Yes                                   | -                              | RplB                   |
| b2500             | b2500             | purN         | purN         | No                                    | 44                             |                        |
| b3301             | b2517             | rplO         | rlmN         | Yes                                   | -                              | RplO, RlmN             |
| b2573             | b2573             | rpoE         | rpoE         | Yes                                   | 14                             |                        |
| b0084             | b3208             | ftsI         | mtgA         | No                                    | -                              |                        |
| b3701             | b3386             | dnaN         | rpe          | Yes                                   | -                              | DnaN, Rpe              |
| b3729             | b1411             | glmS         | ynbD         | Yes                                   | 202                            | GlmS                   |
| b0397             | b1410             | sbcC         | ynbC         | Yes                                   | -                              |                        |
| b2509             | b1579             | xseA         | intQ         | Yes                                   | 189                            |                        |
| b2616             | b1435             | recN         | ydcP         | Yes                                   | 8                              |                        |
| b4016             | b1136             | aceK         | icd          | Yes                                   | 357                            |                        |

Continued on next page

Table S3: **Locus tag and gene id of detected protein interaction in Y2H data.** Locus tag and gene name of interacting proteins are listed in the first four columns. The existence of the interaction in other PPI networks is shown in the fifth column. The sixth and seventh column highlights whether the interacting proteins has been detected in a PPI module and whether one of the proteins is a central protein in a PPI module. (Continued from previous page)

| <b>Locus tag1</b> | <b>Locus tag2</b> | <b>Gene1</b> | <b>Gene2</b> | <b>Existing in other data sources</b> | <b>Id of a detected module</b> | <b>Central protein</b> |
|-------------------|-------------------|--------------|--------------|---------------------------------------|--------------------------------|------------------------|
| b2017             | b4539             | yefM         | yoeB         | Yes                                   | 241                            |                        |
| b0595             | b0594             | entB         | entE         | No                                    | -                              |                        |
| b0849             | b3610             | grxA         | grxC         | No                                    | -                              |                        |
| b1120             | b0959             | cobB         | sxy          | Yes                                   | 126                            |                        |
| b4372             | b1410             | holD         | ynbC         | Yes                                   | -                              |                        |
| b1176             | b1613             | minC         | manA         | Yes                                   | -                              |                        |
| b1200             | b3030             | dhaK         | parE         | Yes                                   | -                              | ParE                   |
| b0091             | b4230             | murC         | ytfT         | Yes                                   | -                              |                        |
| b2319             | b1854             | usg          | pykA         | Yes                                   | -                              |                        |
| b1082             | b1070             | flgK         | flgN         | Yes                                   | -                              |                        |
| b1884             | b4146             | cheR         | epmB         | Yes                                   | -                              |                        |
| b3315             | b2232             | rplV         | ubiG         | Yes                                   | 2                              | RplV                   |
| b3743             | b1967             | asnC         | hchA         | Yes                                   | -                              |                        |
| b4143             | b2385             | groL         | ypdF         | Yes                                   | -                              | GroL                   |
| b2679             | b0286             | proX         | paoA         | Yes                                   | -                              |                        |
| b1235             | b0382             | rssB         | iraP         | No                                    | -                              |                        |
| b1884             | b1941             | cheR         | fliI         | Yes                                   | -                              |                        |
| b1926             | b1926             | fliT         | fliT         | Yes                                   | 309                            |                        |
| b2573             | b1941             | rpoE         | fliI         | Yes                                   | -                              |                        |
| b1807             | b4373             | tsaB         | rimI         | No                                    | -                              |                        |
| b3995             | b3995             | rsd          | rsd          | No                                    | 14                             |                        |
| b2719             | b2719             | hycG         | hycG         | Yes                                   | 150                            |                        |
| b2719             | b0199             | hycG         | metN         | Yes                                   | -                              | MetN                   |
| b2719             | b0817             | hycG         | mntR         | Yes                                   | -                              |                        |
| b4280             | b4280             | yjhC         | yjhC         | Yes                                   | 18                             |                        |
| b0817             | b0199             | mntR         | metN         | Yes                                   | 18                             | MetN                   |
| b0817             | b0817             | mntR         | mntR         | Yes                                   | 18                             |                        |
| b0817             | b2719             | mntR         | hycG         | Yes                                   | -                              |                        |
| b0817             | b0254             | mntR         | perR         | Yes                                   | 18                             |                        |
| b0817             | b3520             | mntR         | yhjB         | Yes                                   | 18                             | YhjB                   |
| b0254             | b0254             | perR         | perR         | Yes                                   | 18                             |                        |
| b4280             | b0817             | yjhC         | mntR         | Yes                                   | 18                             |                        |

**Table S4 Co-expressed genes/proteins which are detected in the same PPI module and their biological functions.**

| PPI Module Number | Co-expressed Genes                                                                                    | Biological Function                                                     |
|-------------------|-------------------------------------------------------------------------------------------------------|-------------------------------------------------------------------------|
| Module 5          | rzpR, ypfH, yecF, yidL, ydhZ, yobD, ypdI, ydjH, ydiV, ydfX, ydaS, frC, insN-2, yedF, yeaD, yhcA, yfjZ | Pathogenicity                                                           |
| Module 11         | ycfP, gadC, wbbK, raiA, yqjD, smg, yjbJ, sgcX                                                         |                                                                         |
| Module 20         | acpP, acpS, fabH, ybgJ, fabG, glmU                                                                    | Fatty acid biosynthesis                                                 |
| Module 24         | dapB, gnd, gcvP, gcvH, gcvT, ysgA, ppc                                                                |                                                                         |
| Module 24         | acnB, ybhP, dadX, glcB, aldB, deoB                                                                    |                                                                         |
| Module 82         | CusS, CusR                                                                                            | CusSR Two-Component Signal Transduction System, dicarboxylate-dependent |
| Module 92         | mog, mobA, mobB, moeA                                                                                 | Mo-molybdopterin cofactor metabolic process                             |
| Module 93         | yihL, yihU, yihV                                                                                      | O-antigen capsule regulation                                            |
| Module 104        | yegS, astC, osmY, gltA                                                                                | Response to stress                                                      |
| Module 112        | mtlD, ydeT, ydfI, yncM, yncI                                                                          | Mannitol metabolic process                                              |
| Module 119        | envz, ompR                                                                                            | EnvZ Two-Component Signal Transduction System, osmotic responsive       |
| Module 131        | mtgA, recJ, recQ, sbcB, ssb, rnhA                                                                     | DNA repair, SOS response                                                |
| Module 187        | narX, narL                                                                                            | NarX Two-Component Signal Transduction System, nitrate dependent        |
| Module 228        | rstA, rstB                                                                                            | RstBA Two-Component Signal Transduction System                          |
| Module 301        | purA, purL, yigB, nadC                                                                                | Nucleotide biosynthetic process                                         |
| Module 315        | cpxA, cpxR                                                                                            | CpxAR Two-Component Signal Transduction System                          |
| Module 329        | fic, ymdC, yhfG                                                                                       | Stationary phase proteins                                               |
| Module 435        | narP, narQ                                                                                            | NarQ Two-Component Signal Transduction System, nitrate dependent        |
| Module 452        | phoP, phoQ                                                                                            | PhoQP Two-Component Signal Transduction System, magnesium-dependent     |
| Module 454        | trxA, trxB, ycdX                                                                                      | Thioredoxin-disulfide reductase activity                                |
